# Supplementary material for: The calmodulin redox sensor controls myogenesis
Source: PubMed Central journal article supplement (PMC7498019; doi:10.1371/journal.pone.0239047), 2020-09-17

Representative immunofluorescence images  
acquired for myogenic factors and muscle proteins  
on days 0-4 of differentiation for wild type (WT)  
and *CALM1* M109Q (2A4) C2C12 cells

Day 0 p-p53

WT

2A4

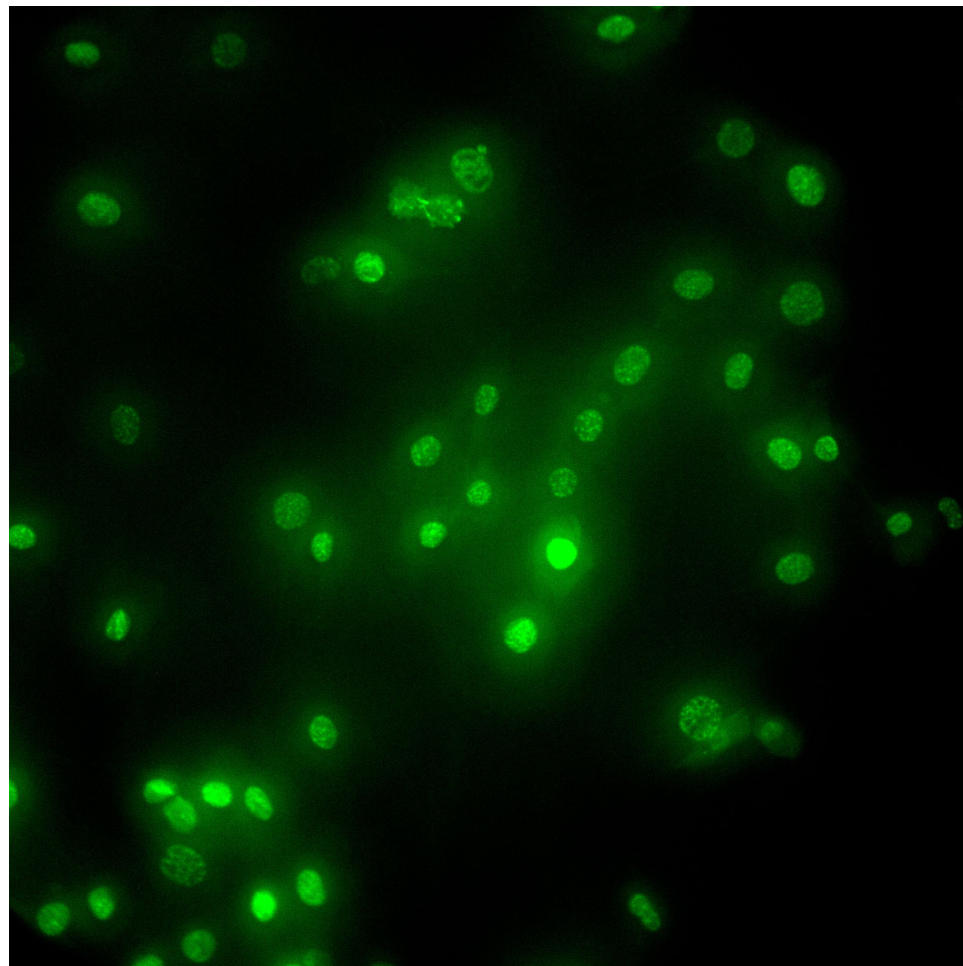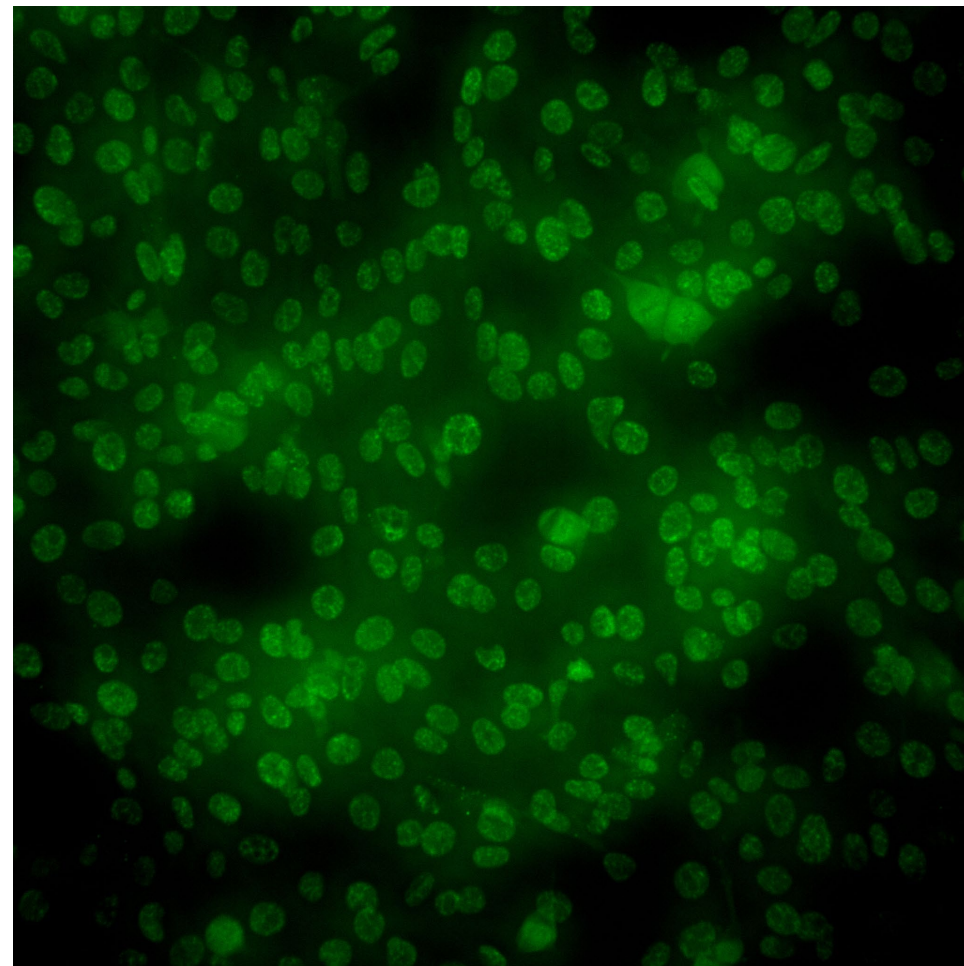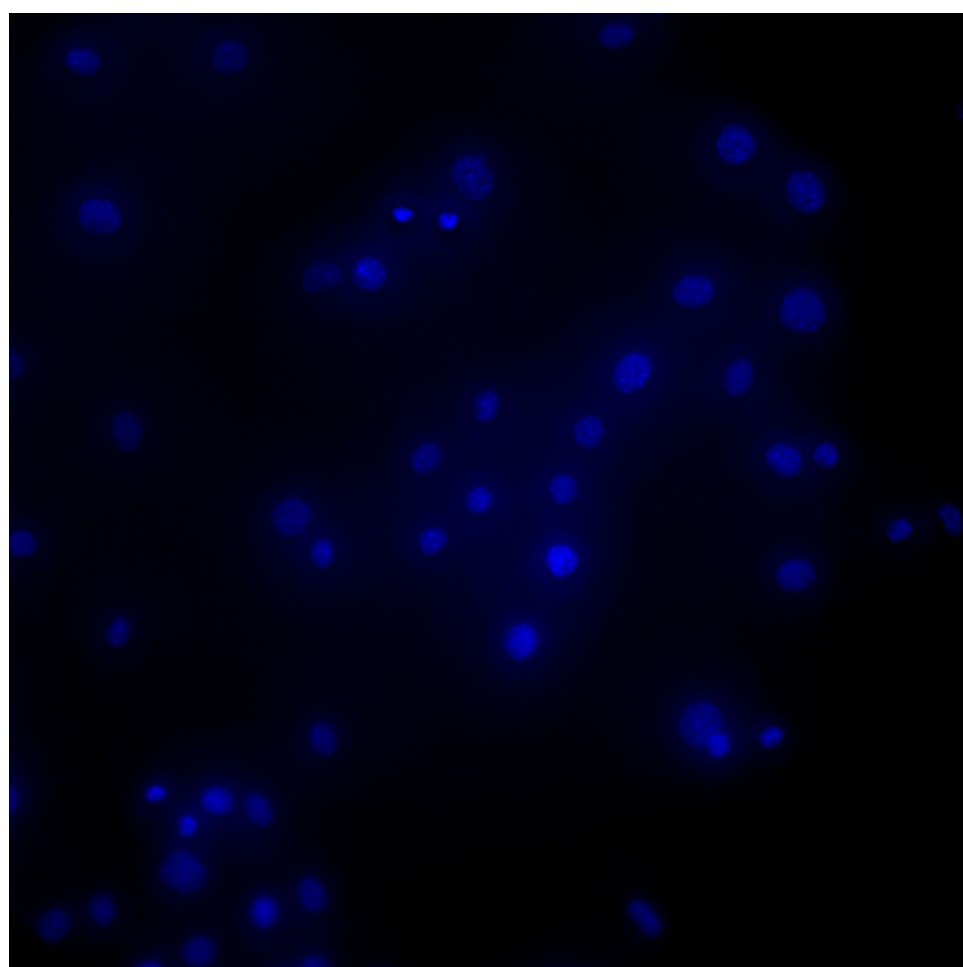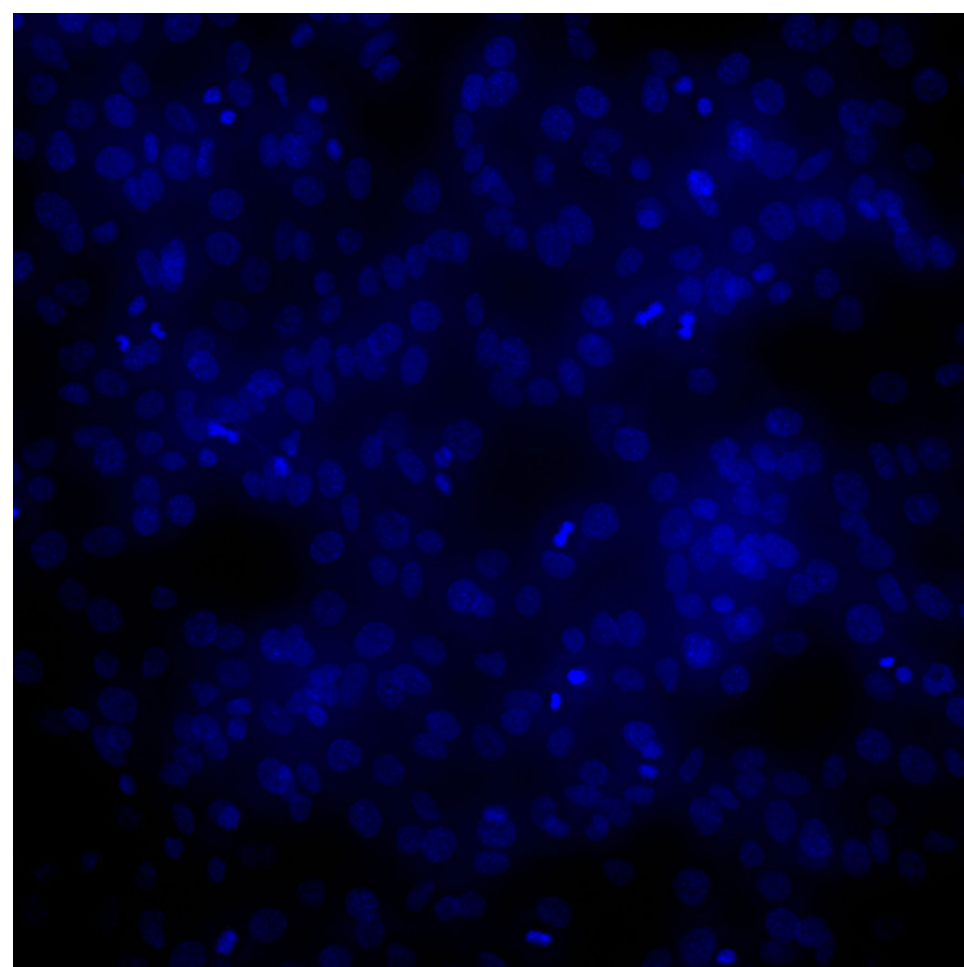



Day 1 p-p53

WT

2A4

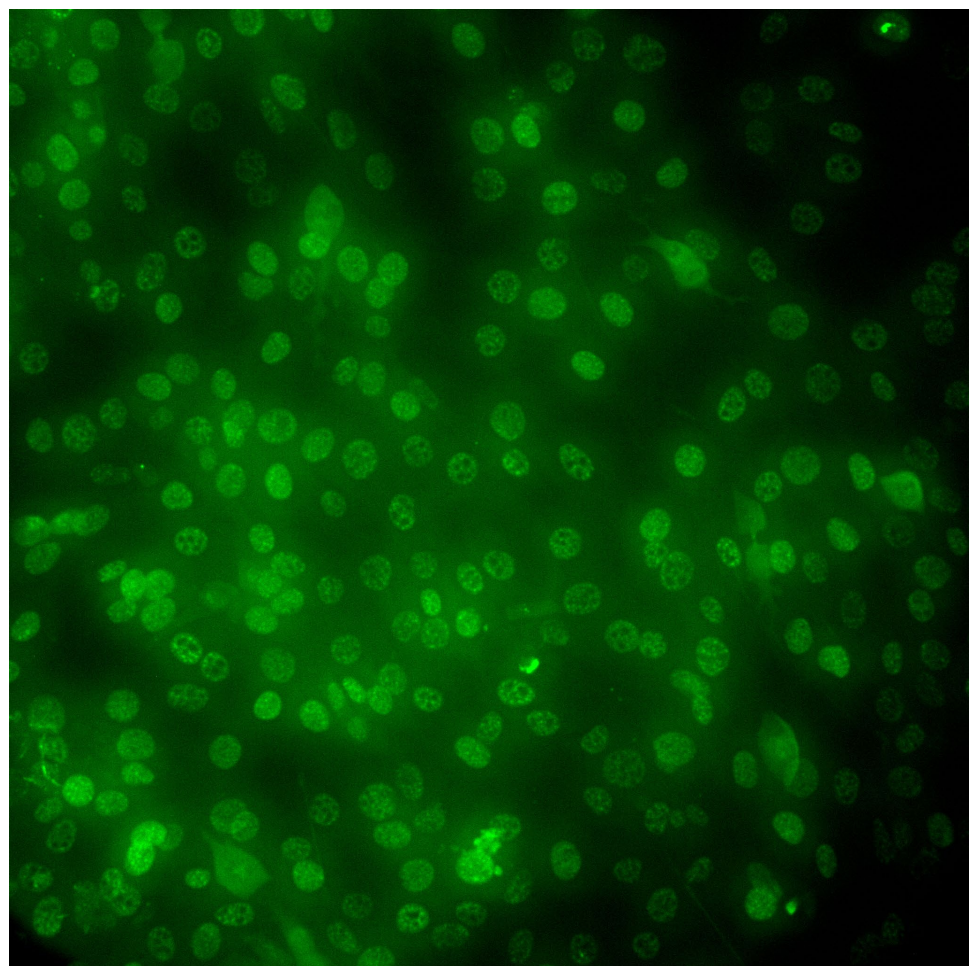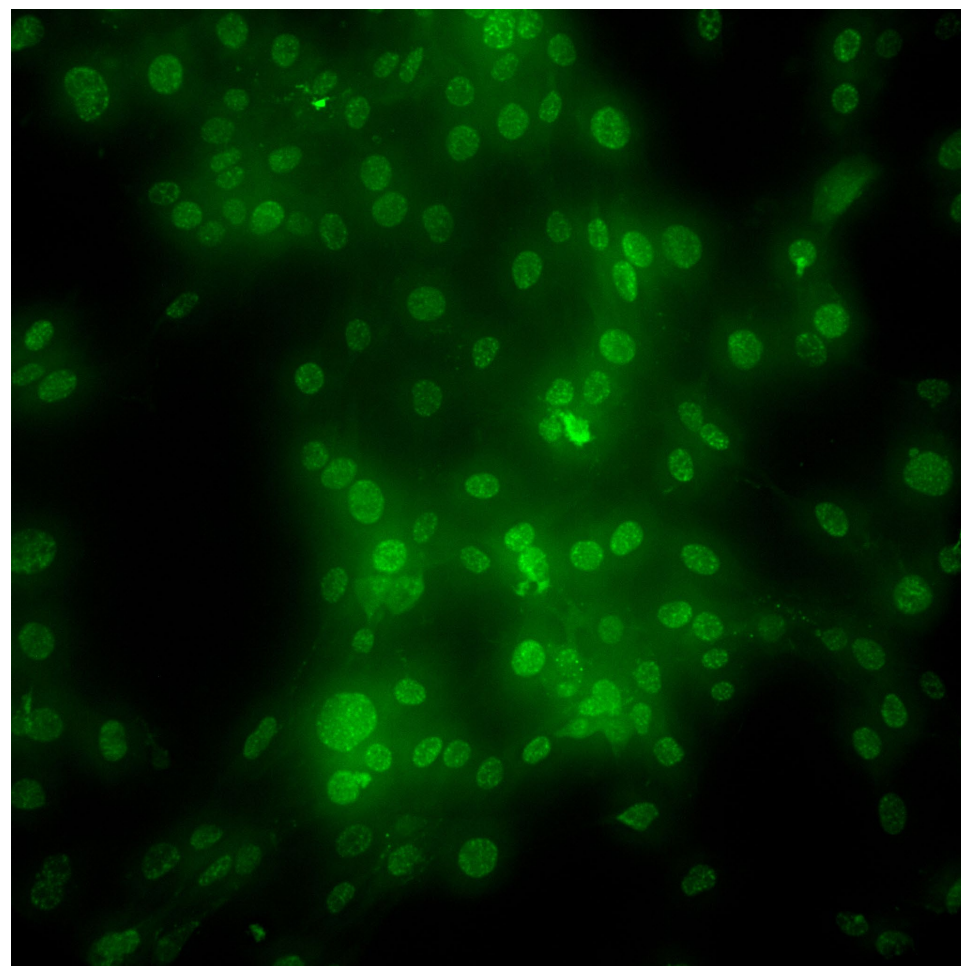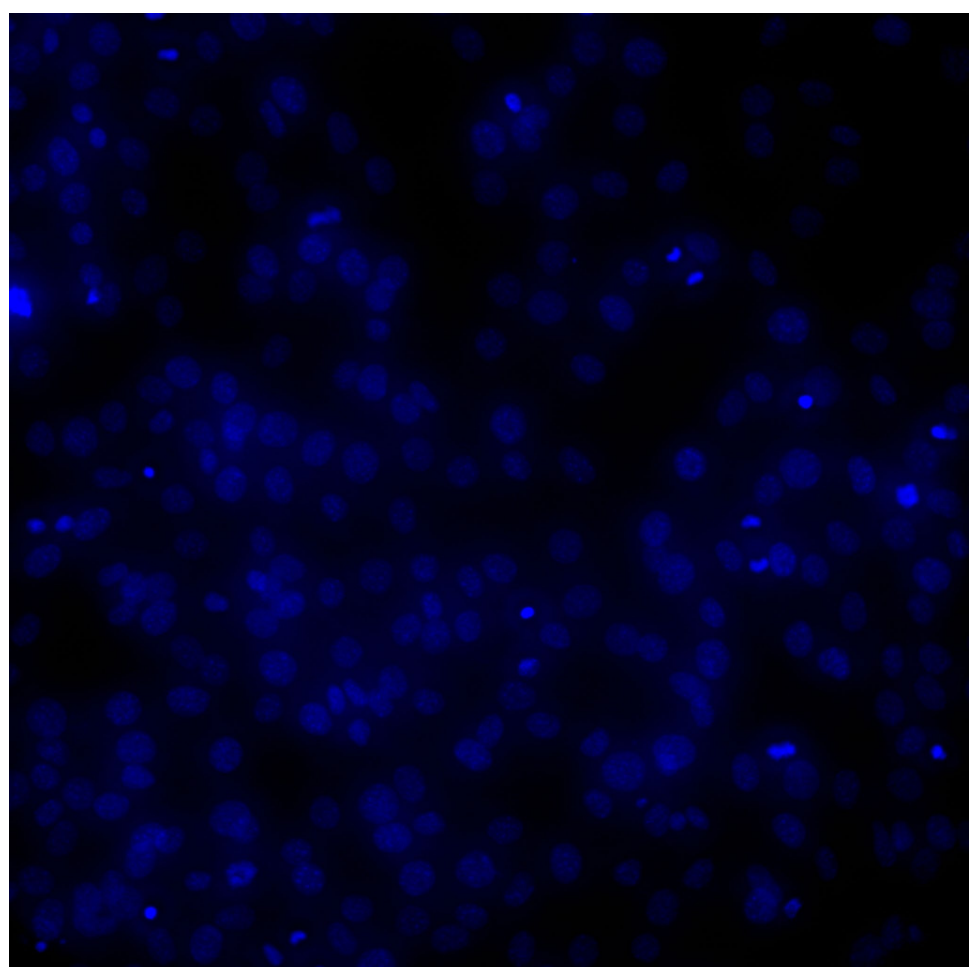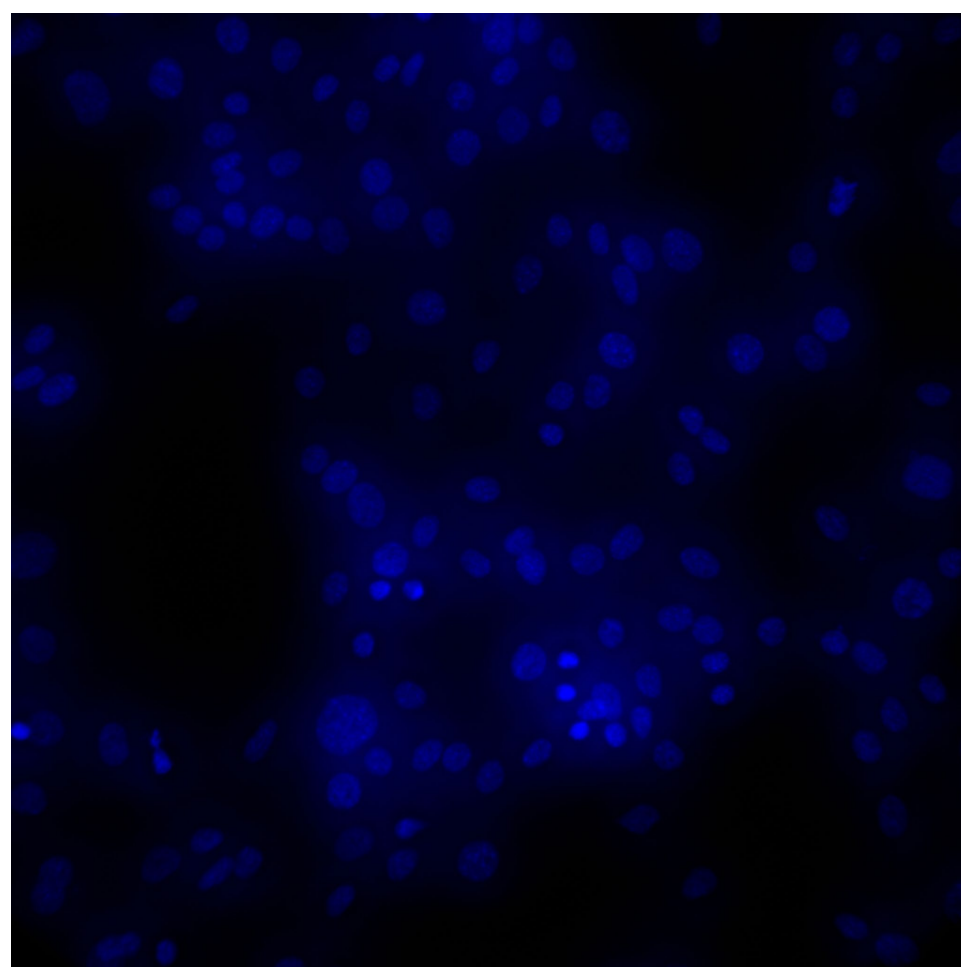



Day 2 p-p53

WT

2A4

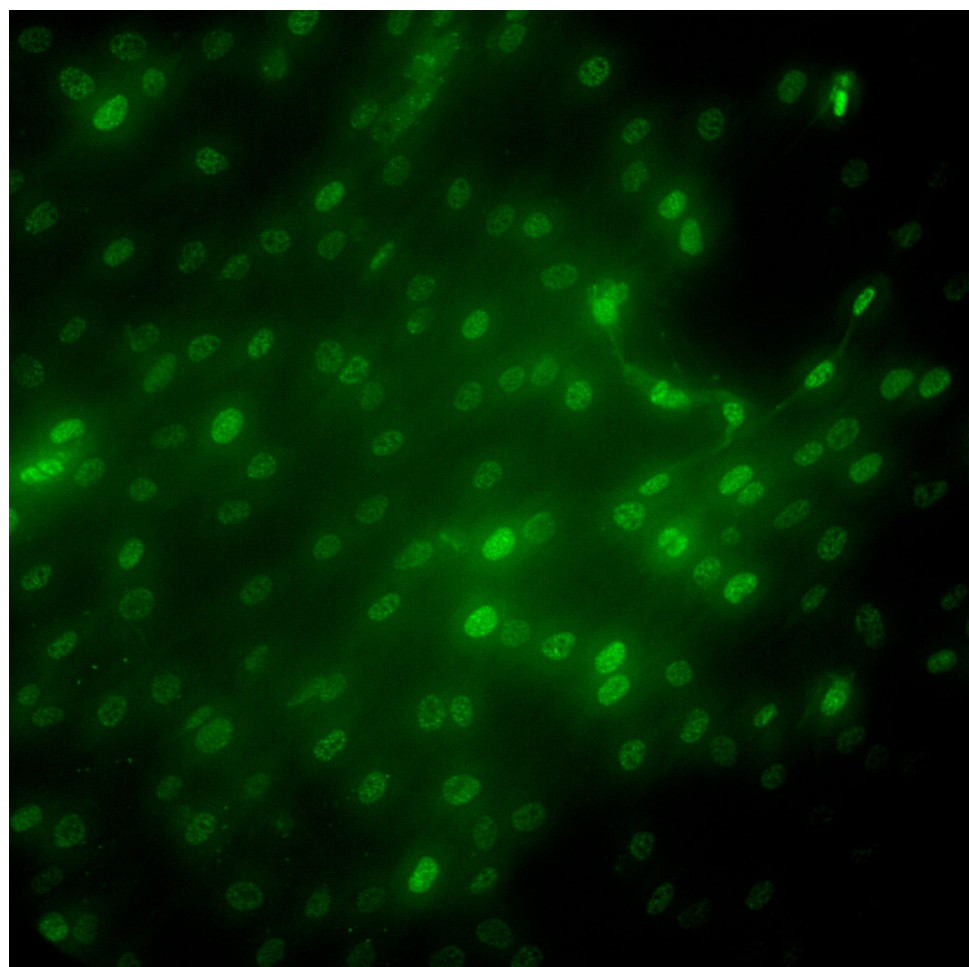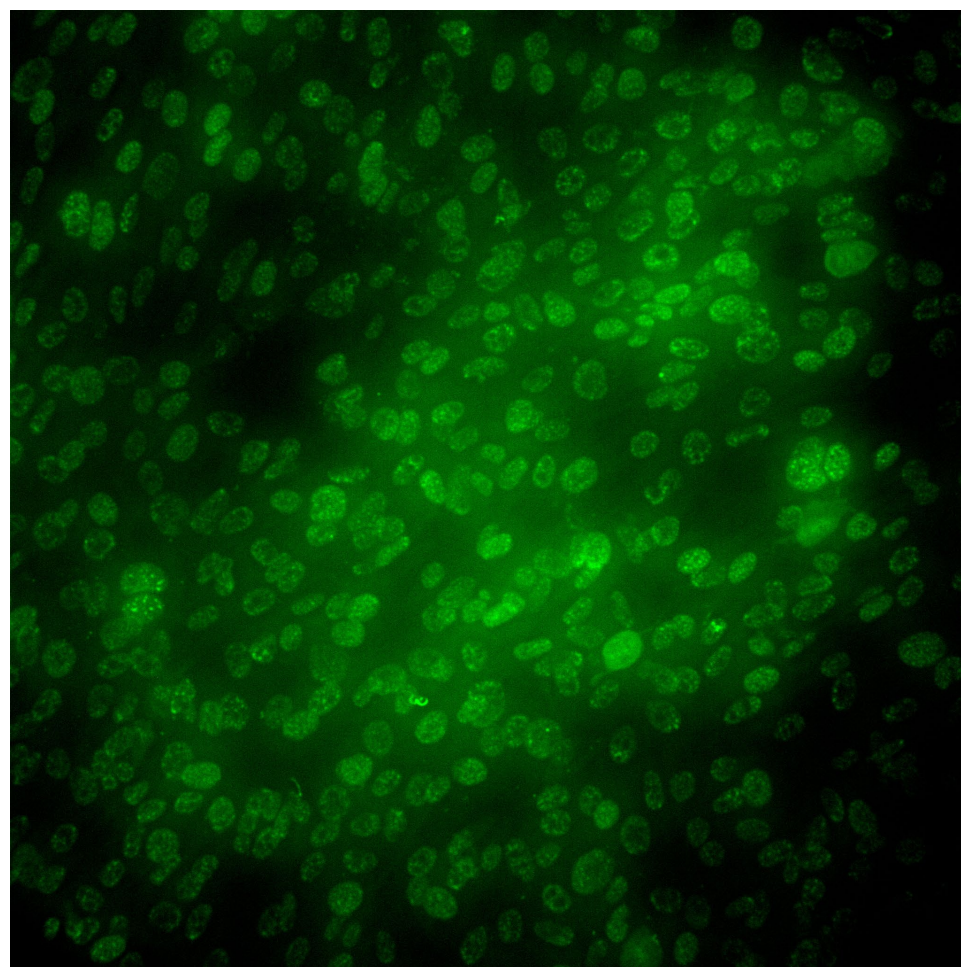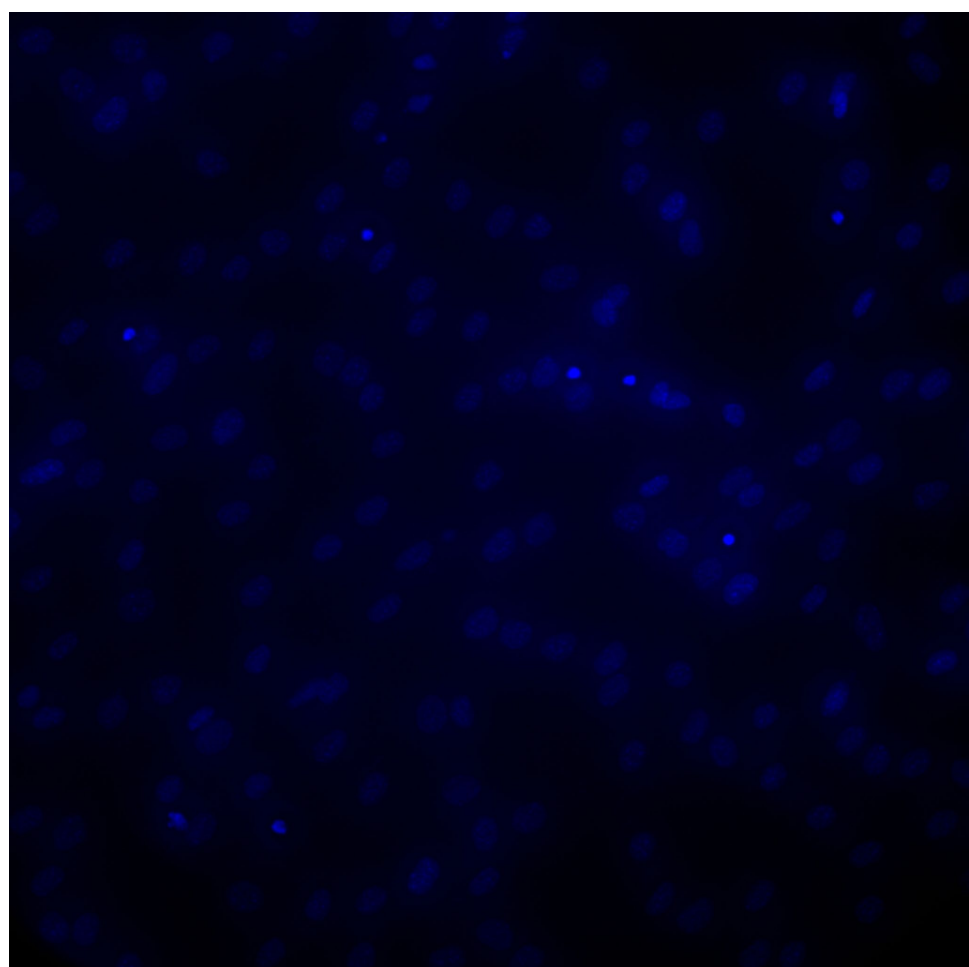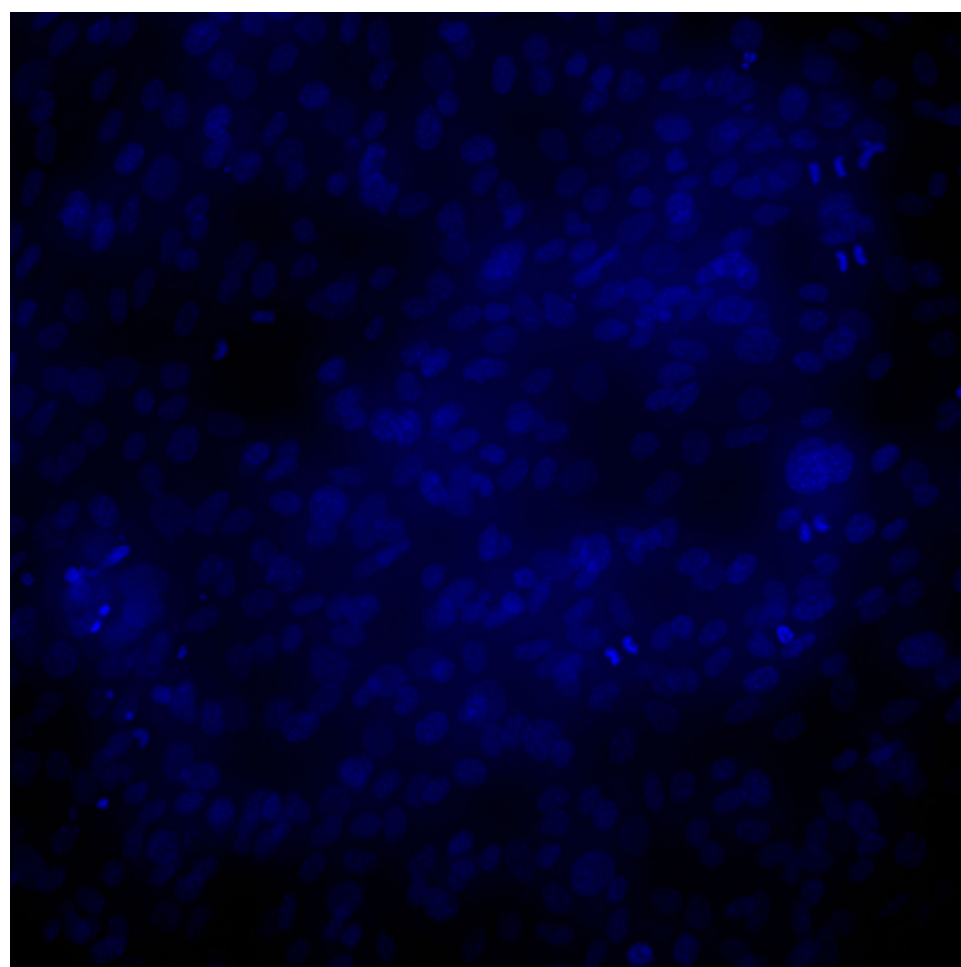



# Day 3 p-p53

WT

2A4

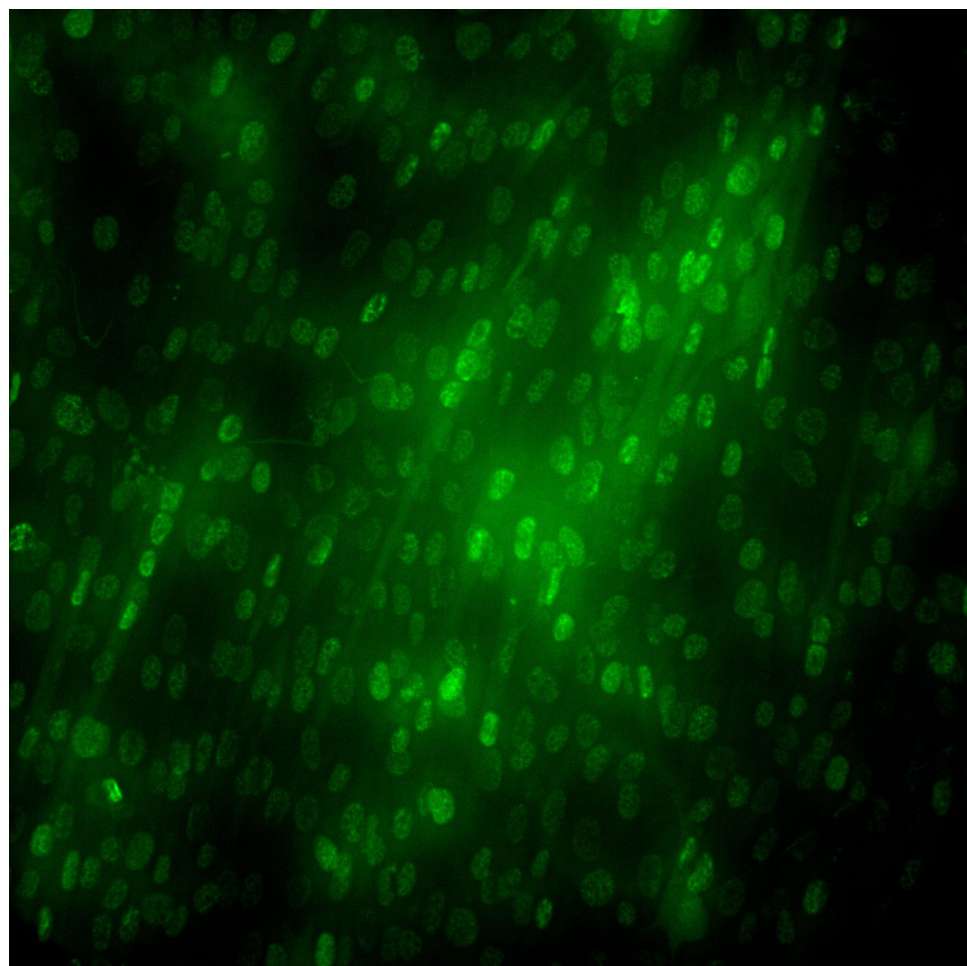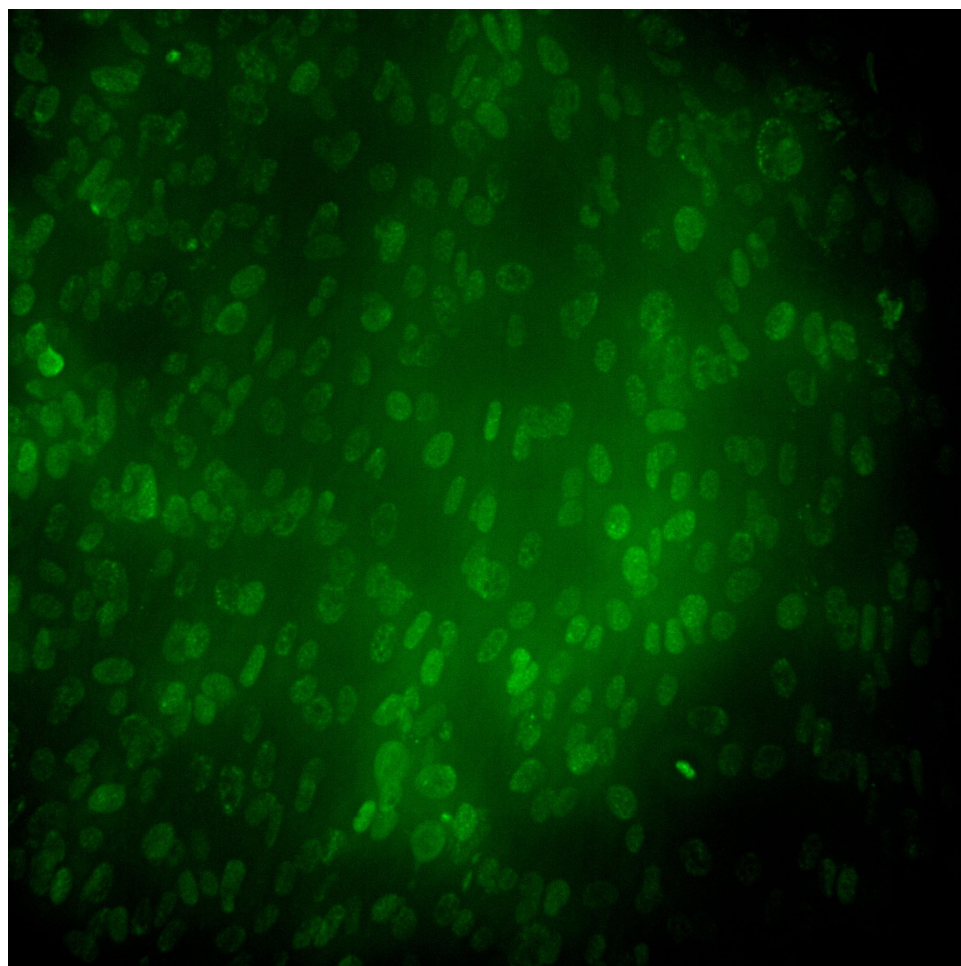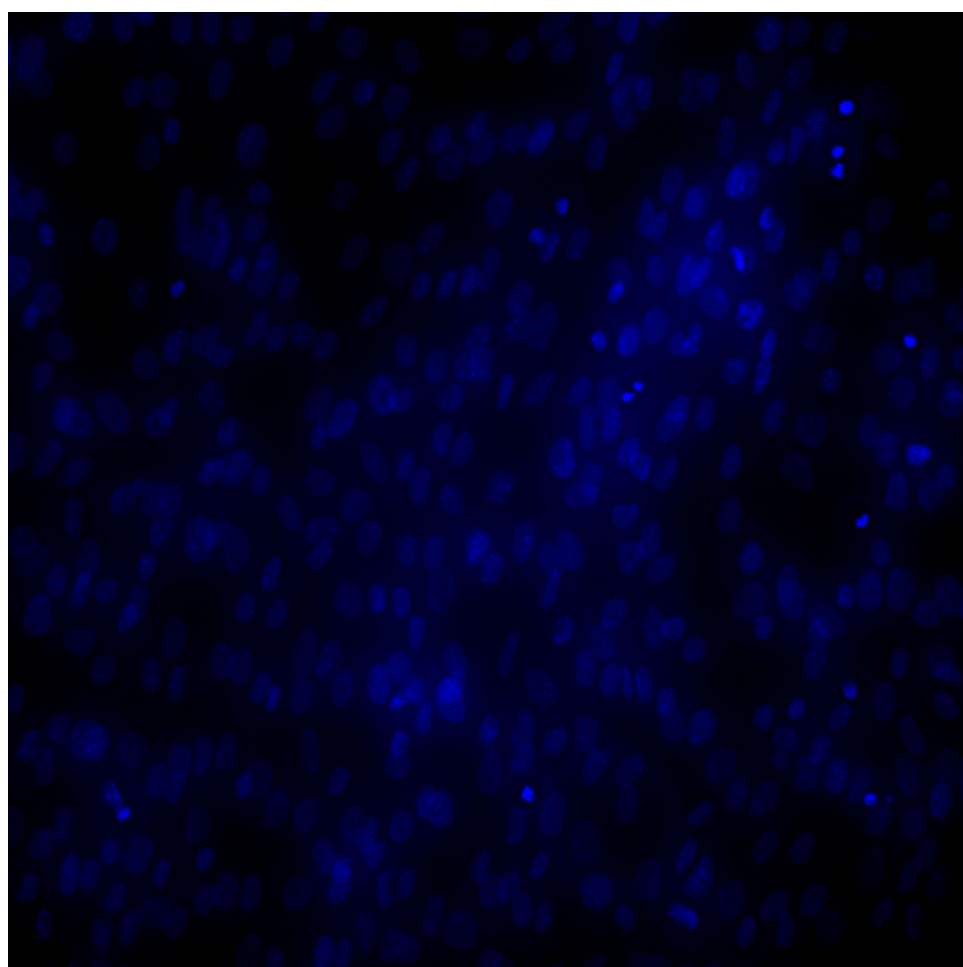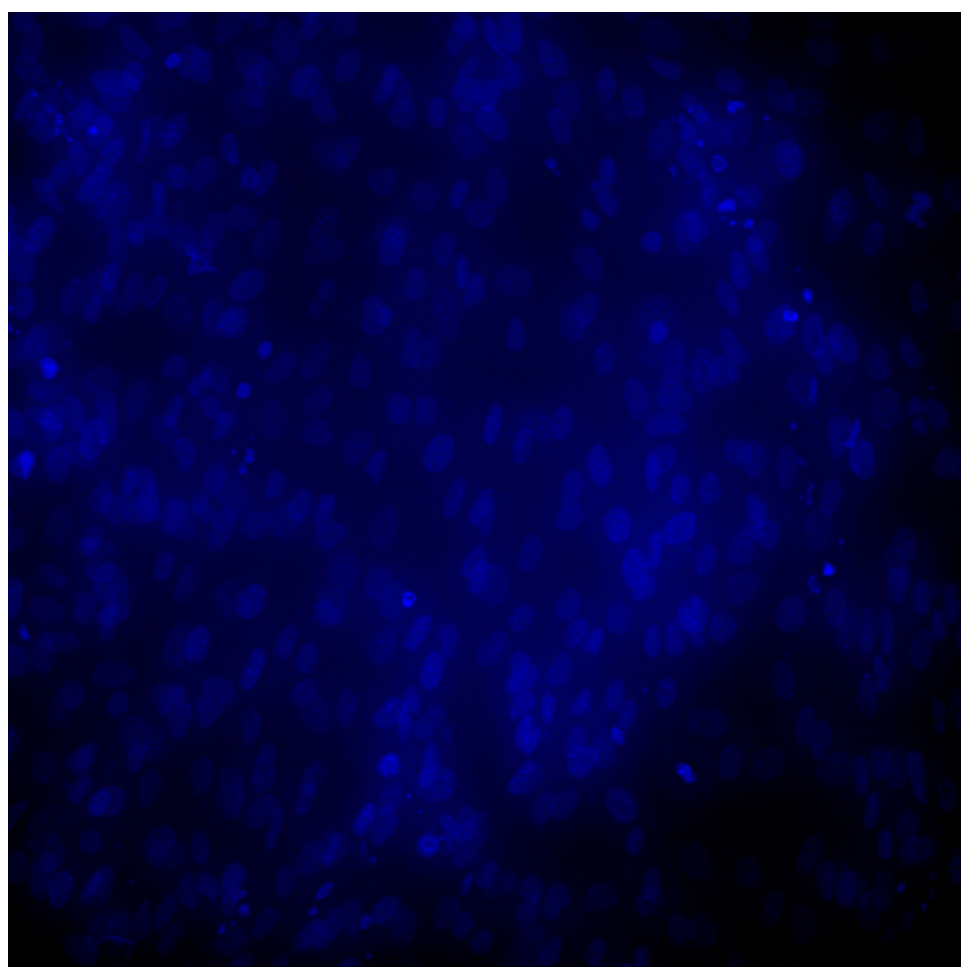



# Day 4 p-p53

WT

2A4

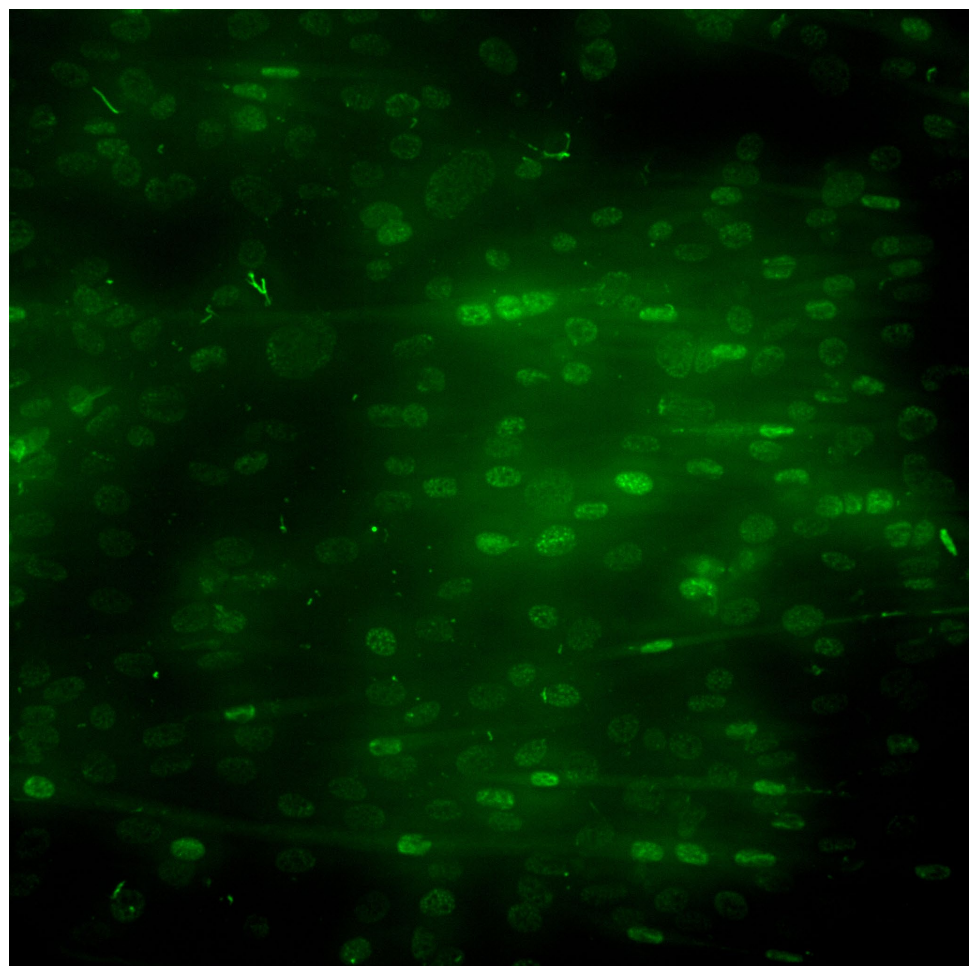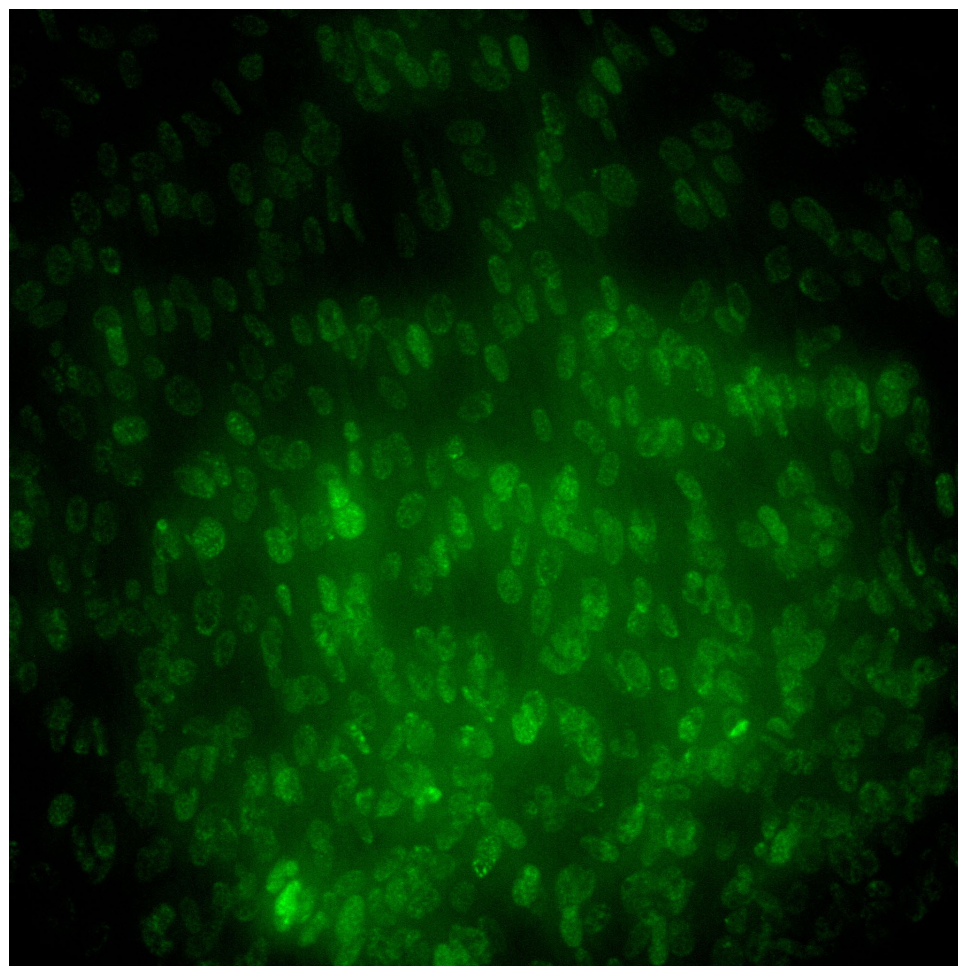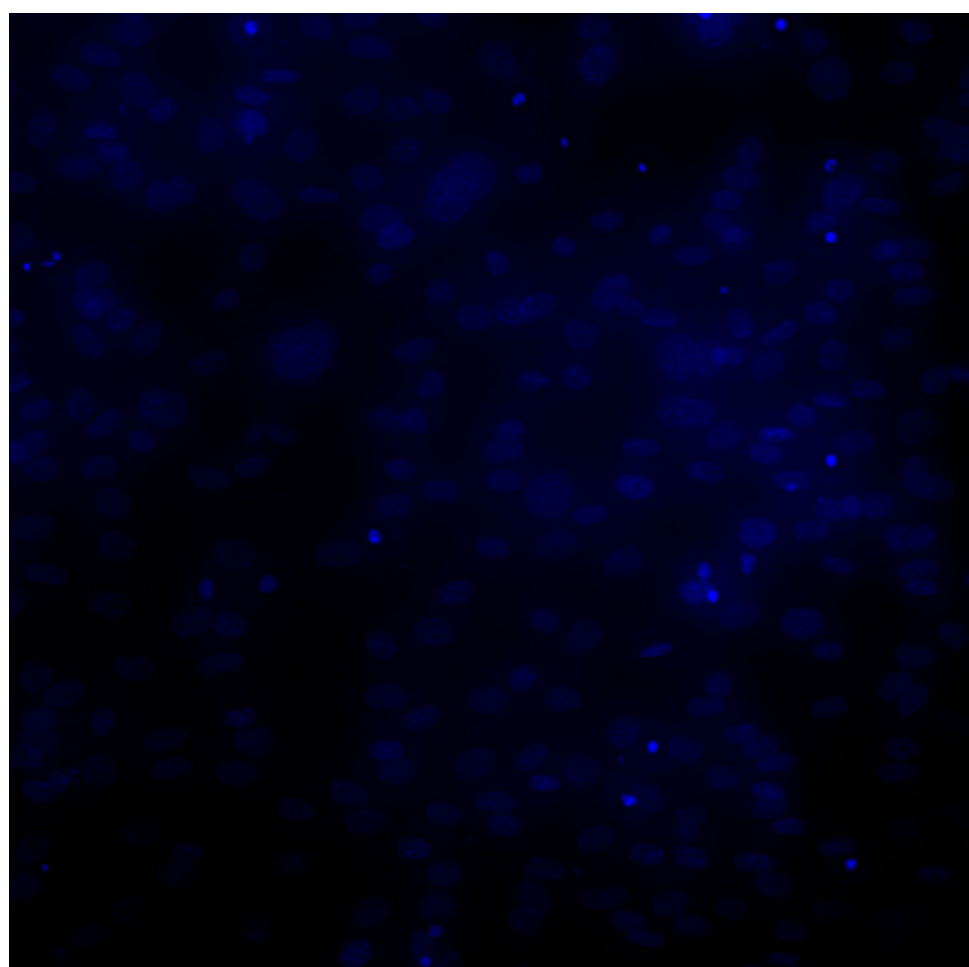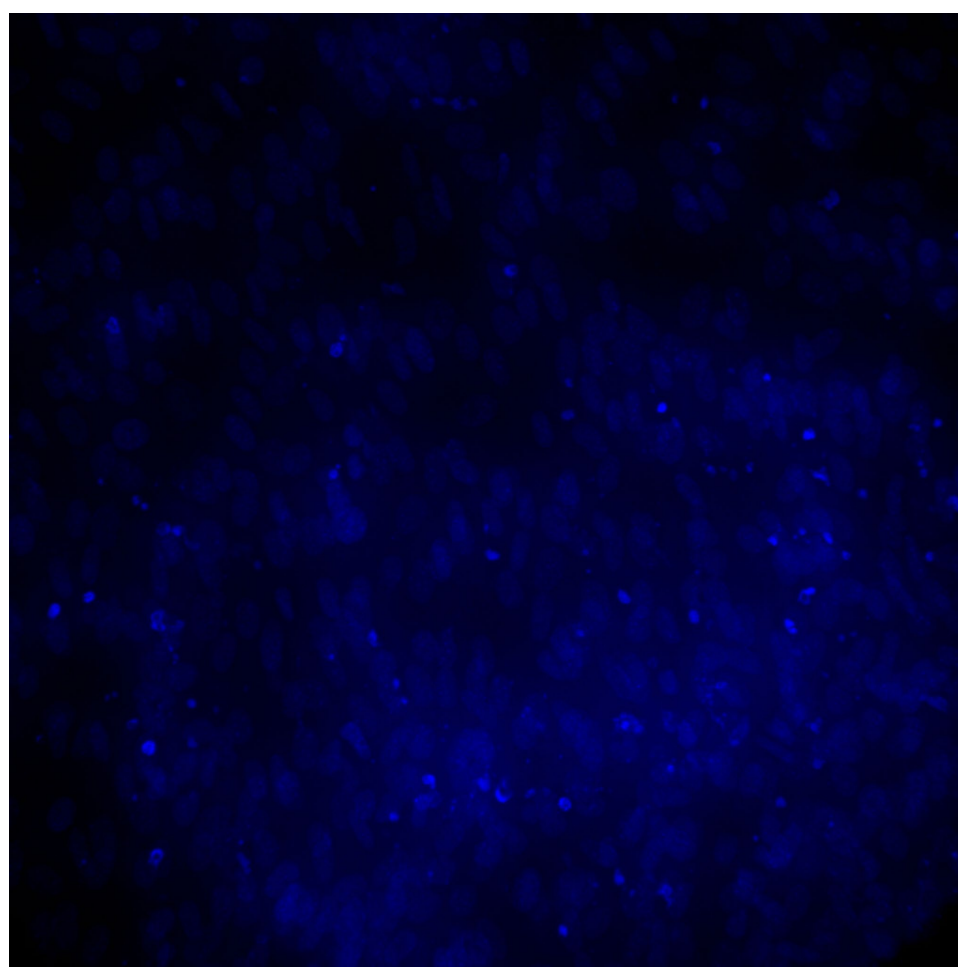



Day 0 p53

WT

2A4

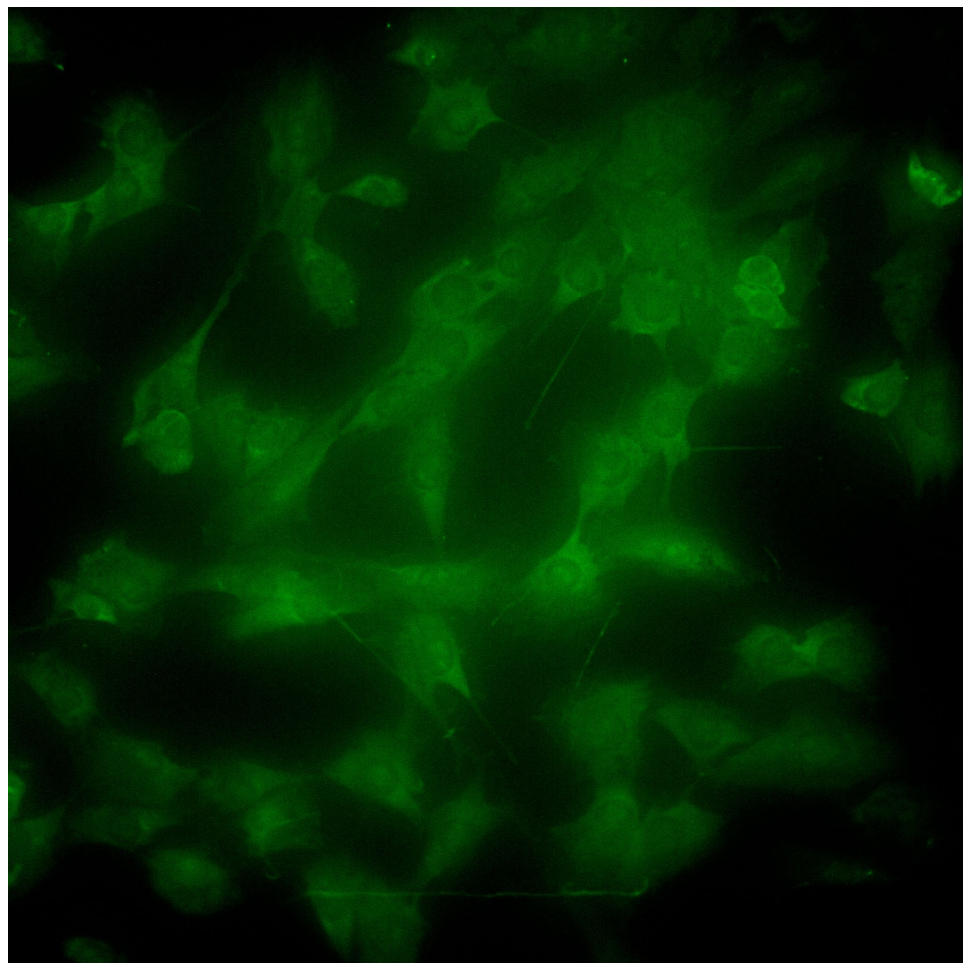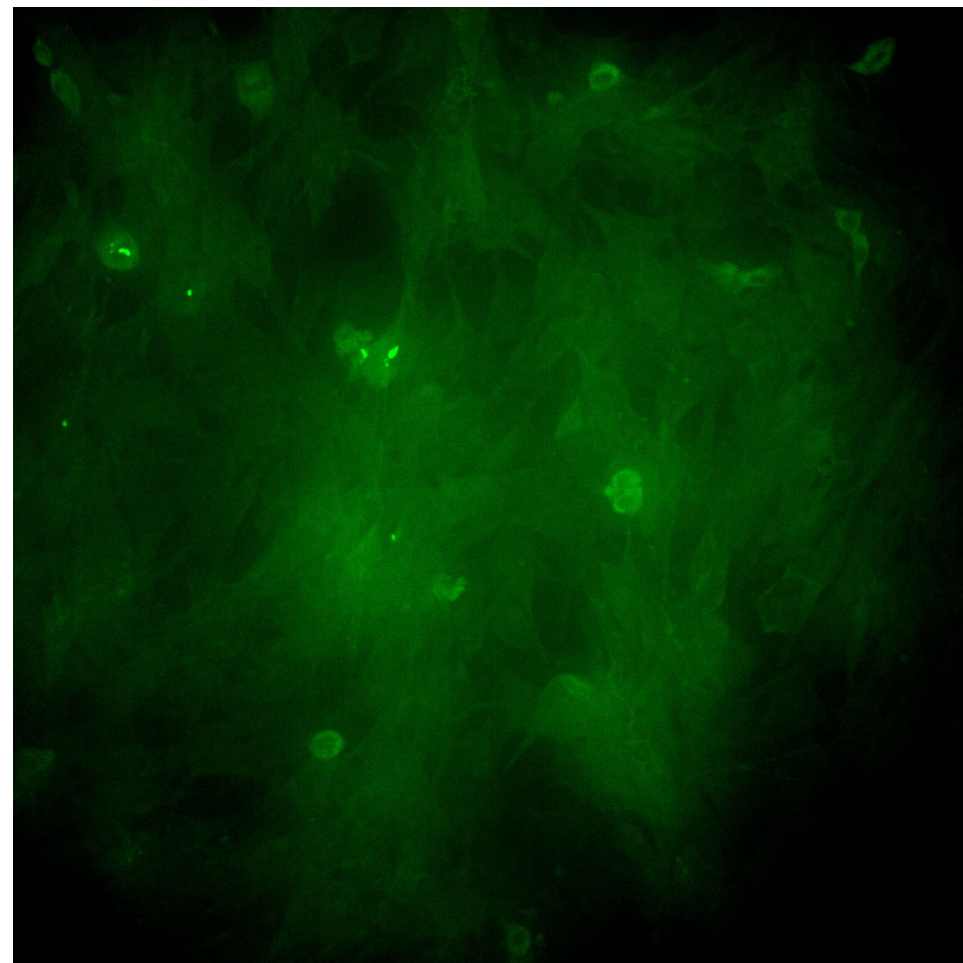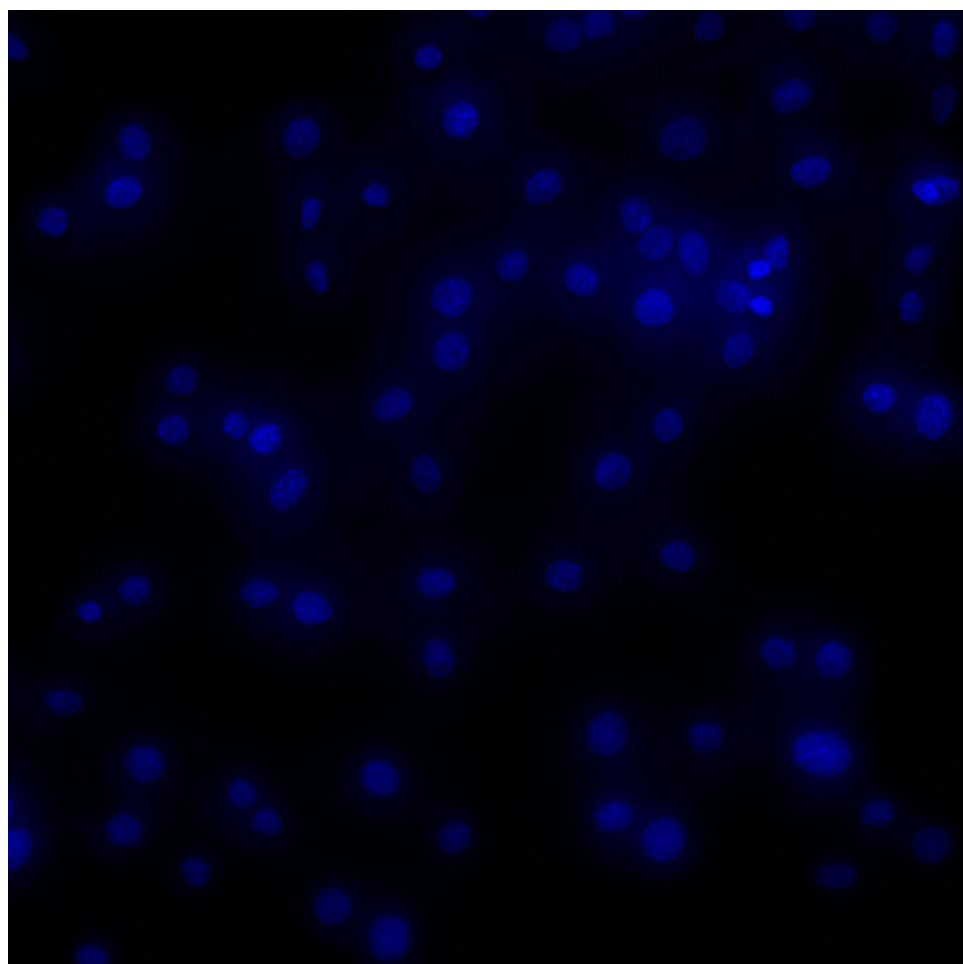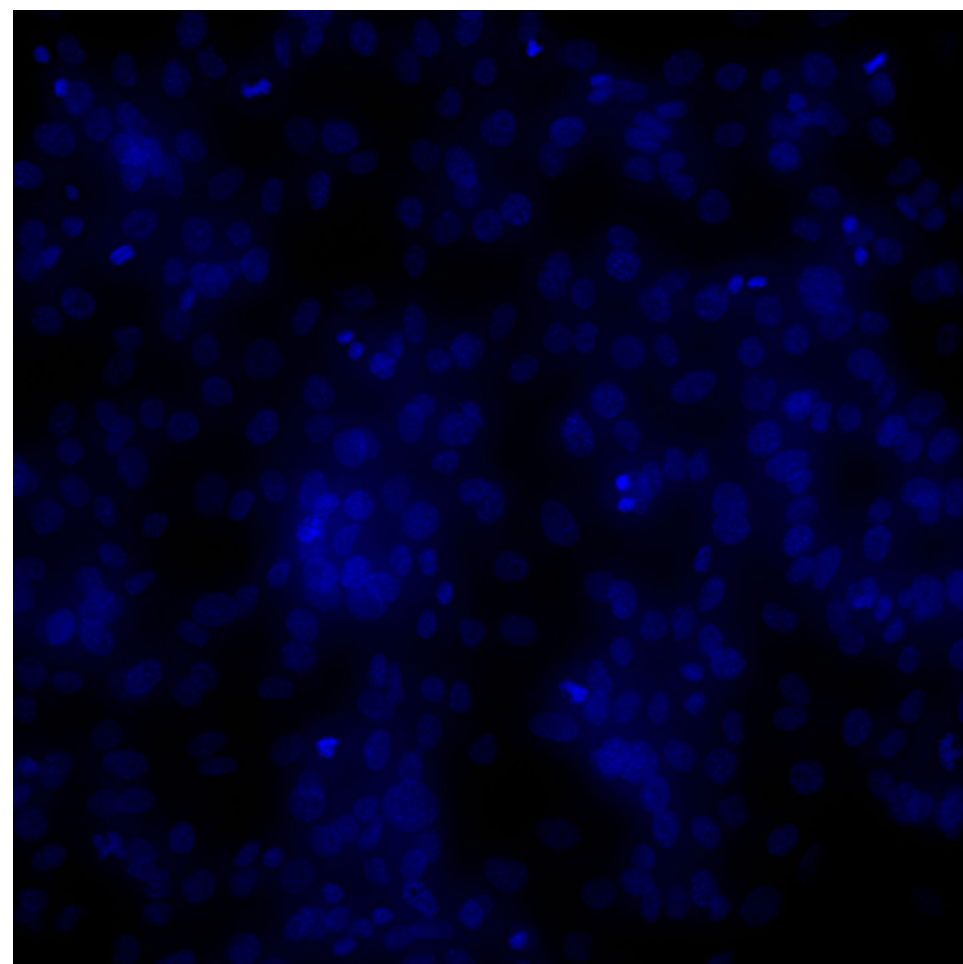



Day 1 p53

WT

2A4

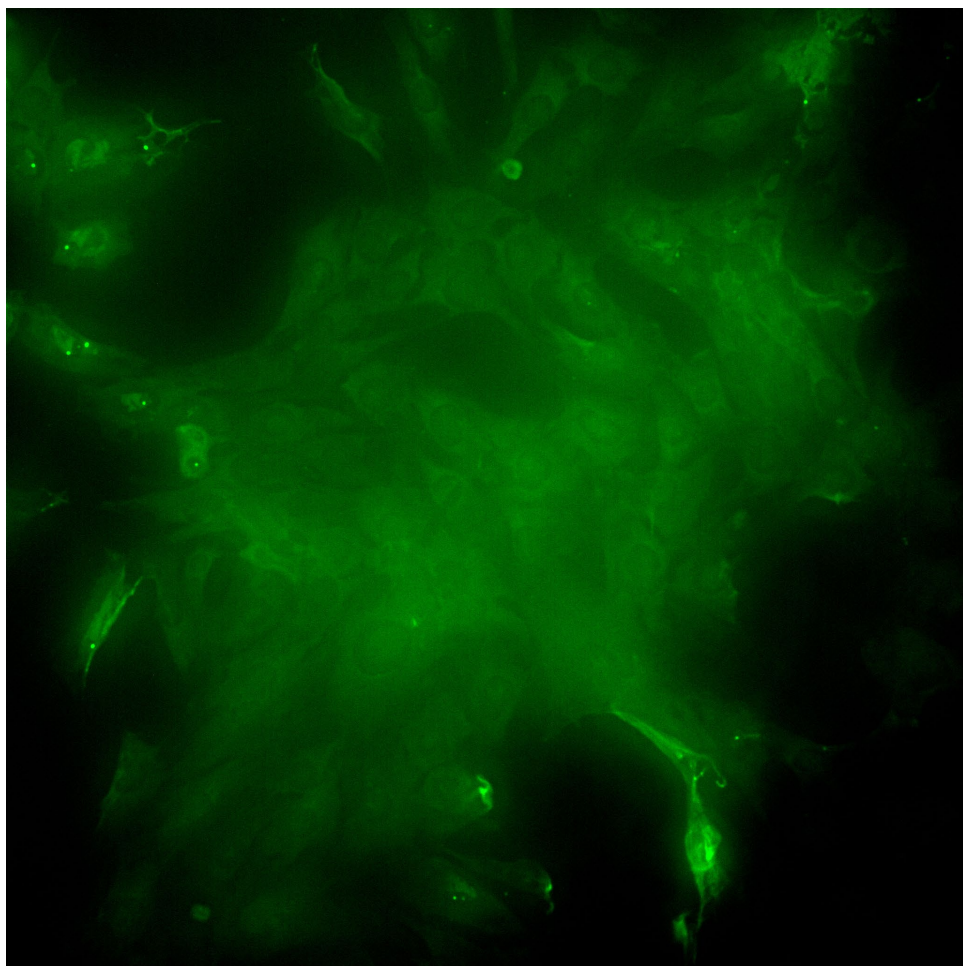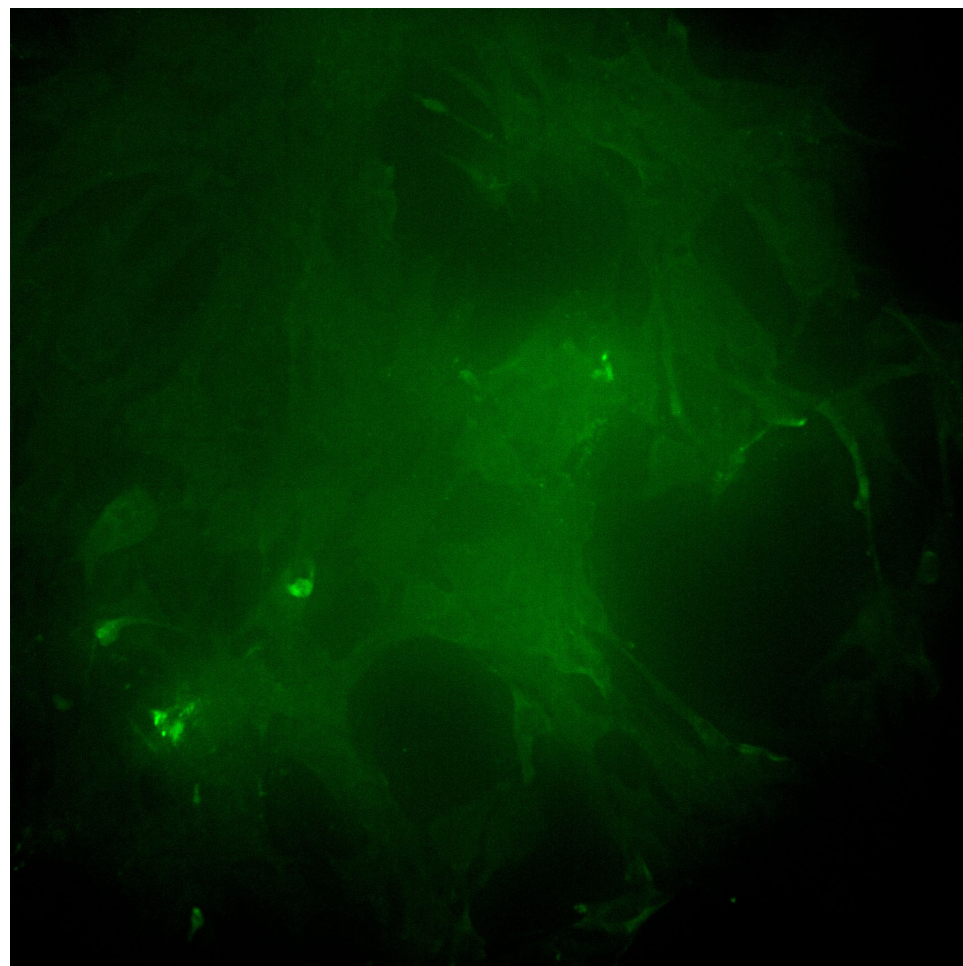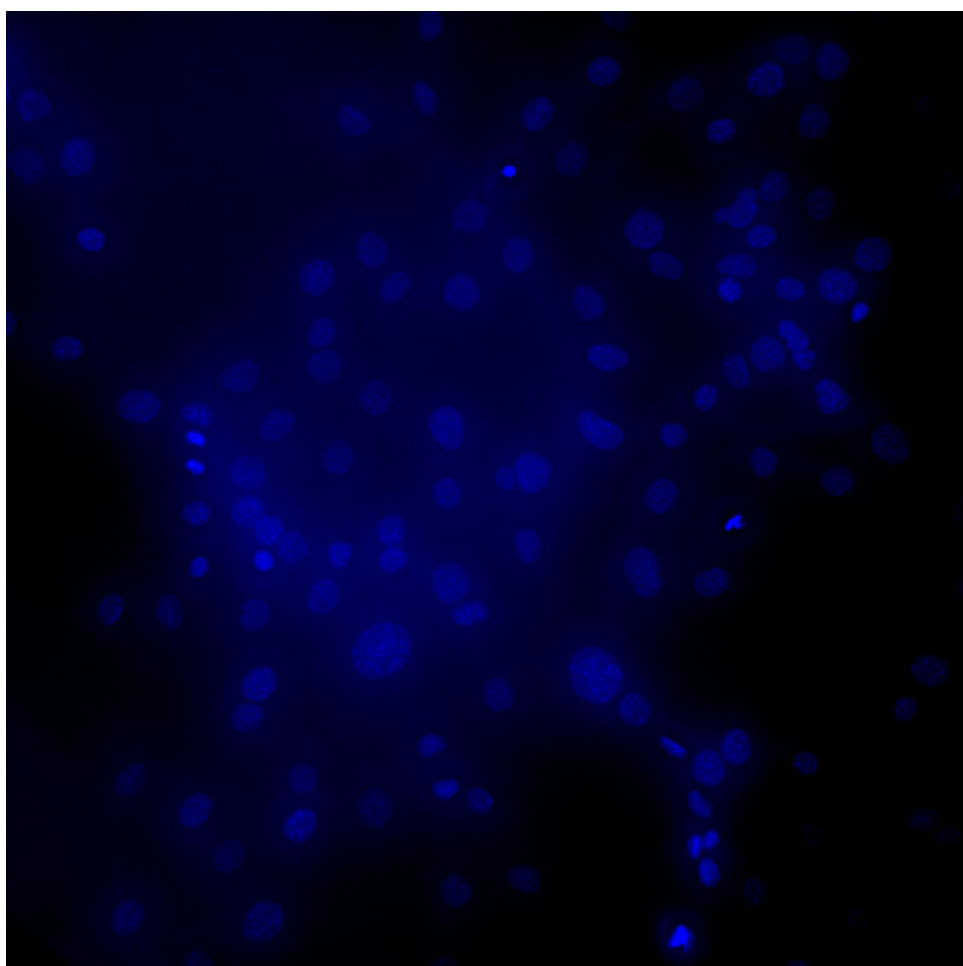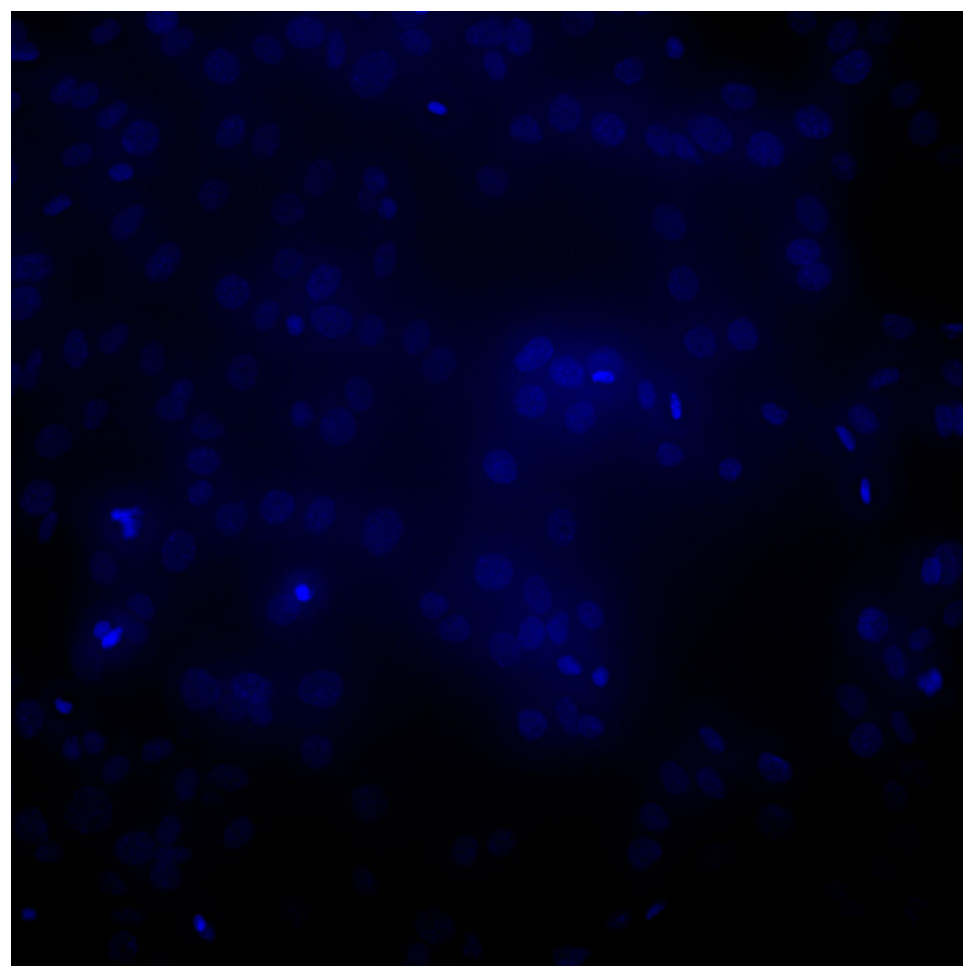



Day 2 p53

WT

2A4

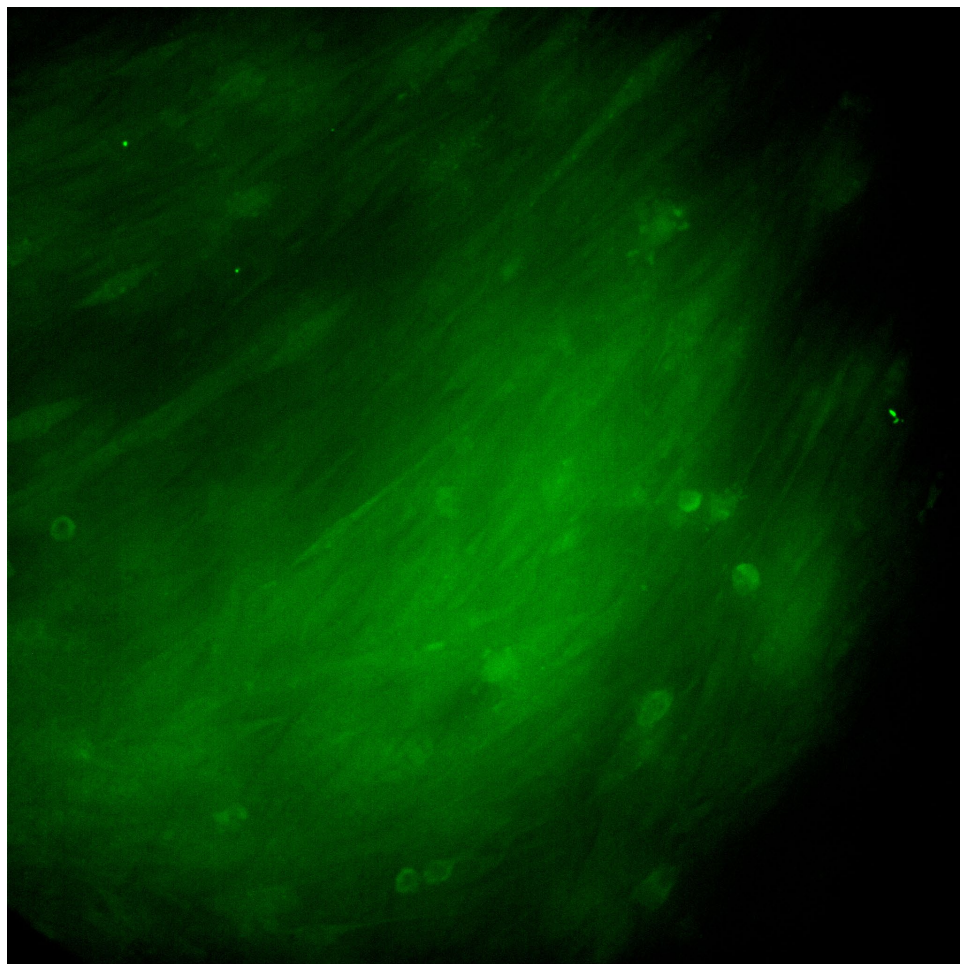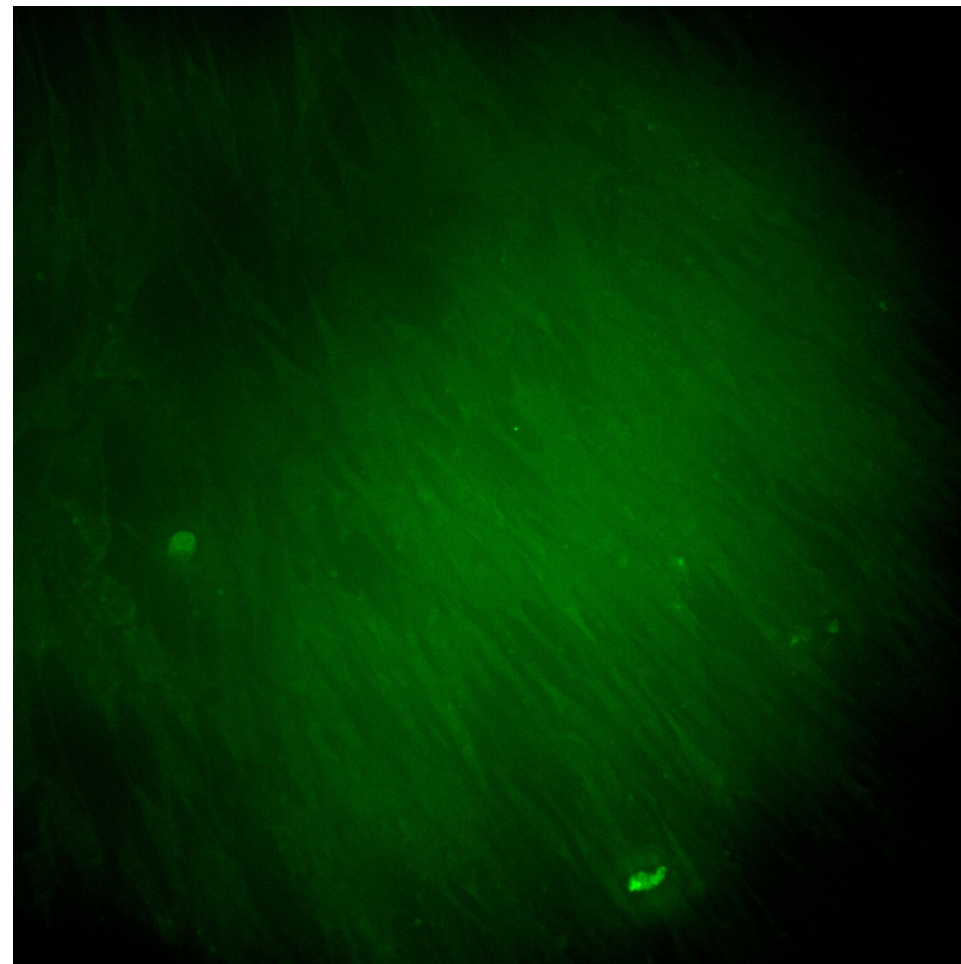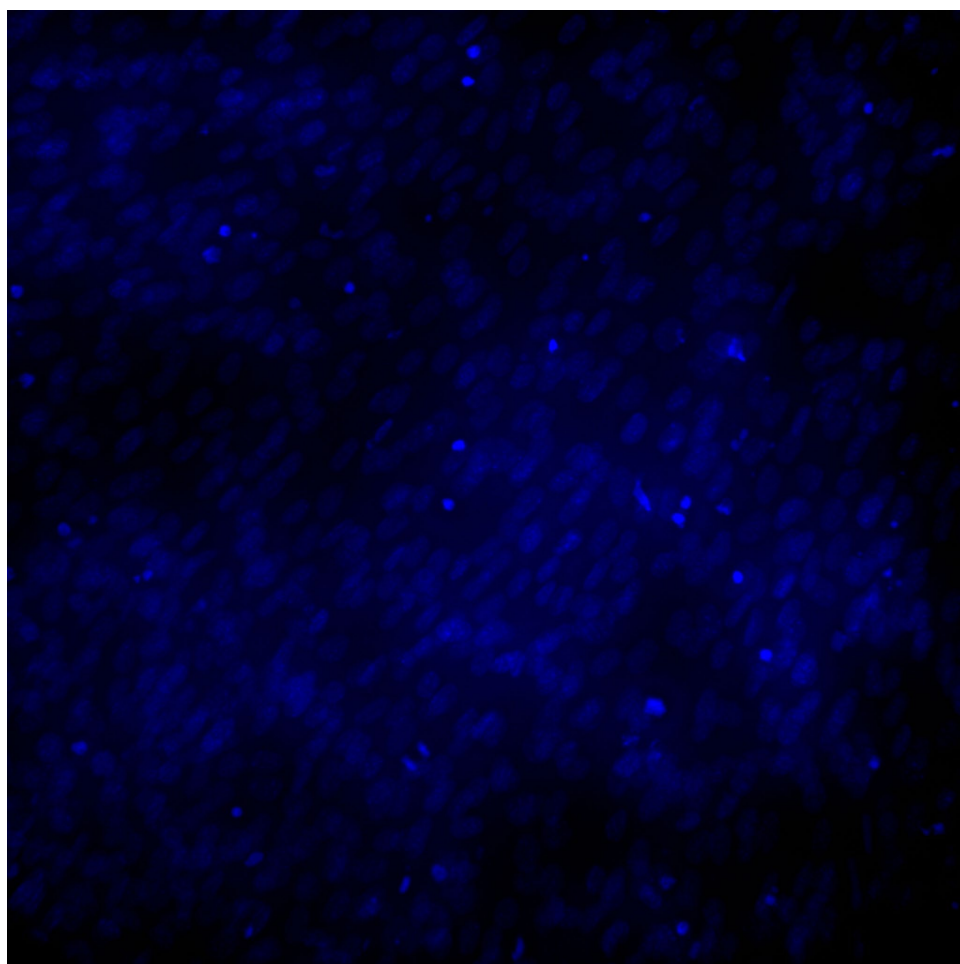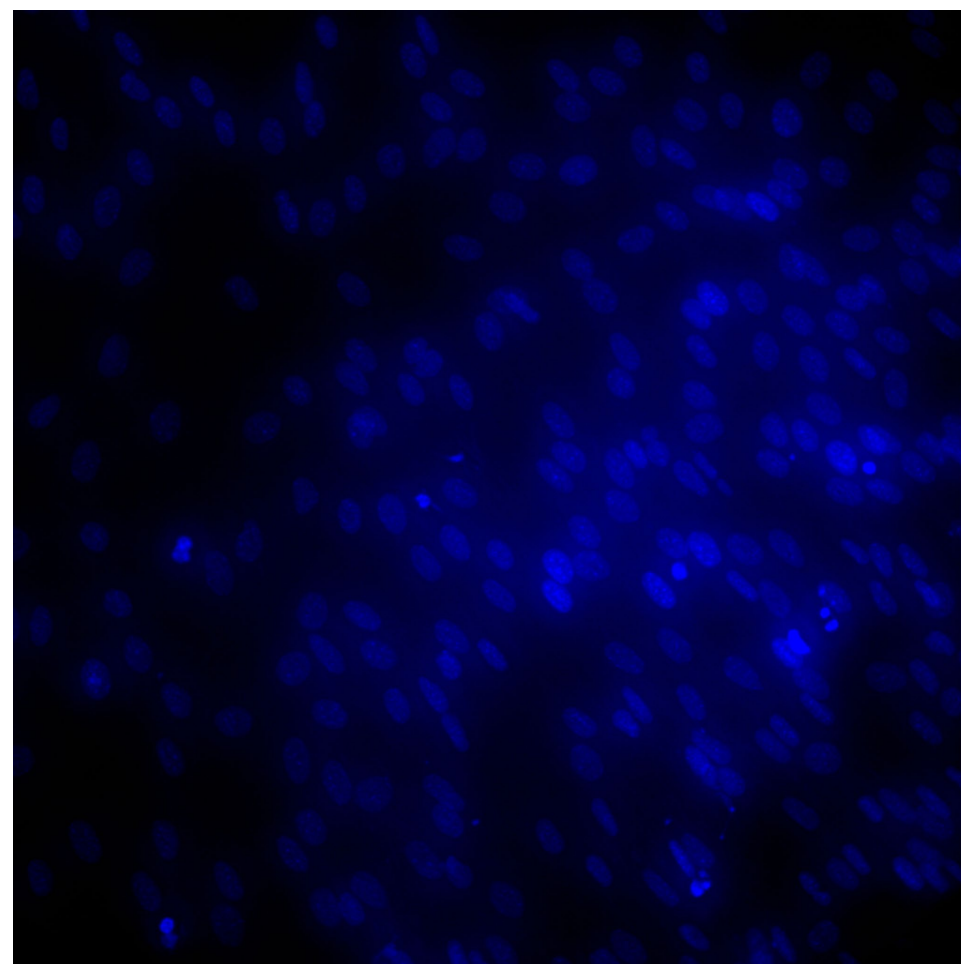



Day 3 p53

WT

2A4

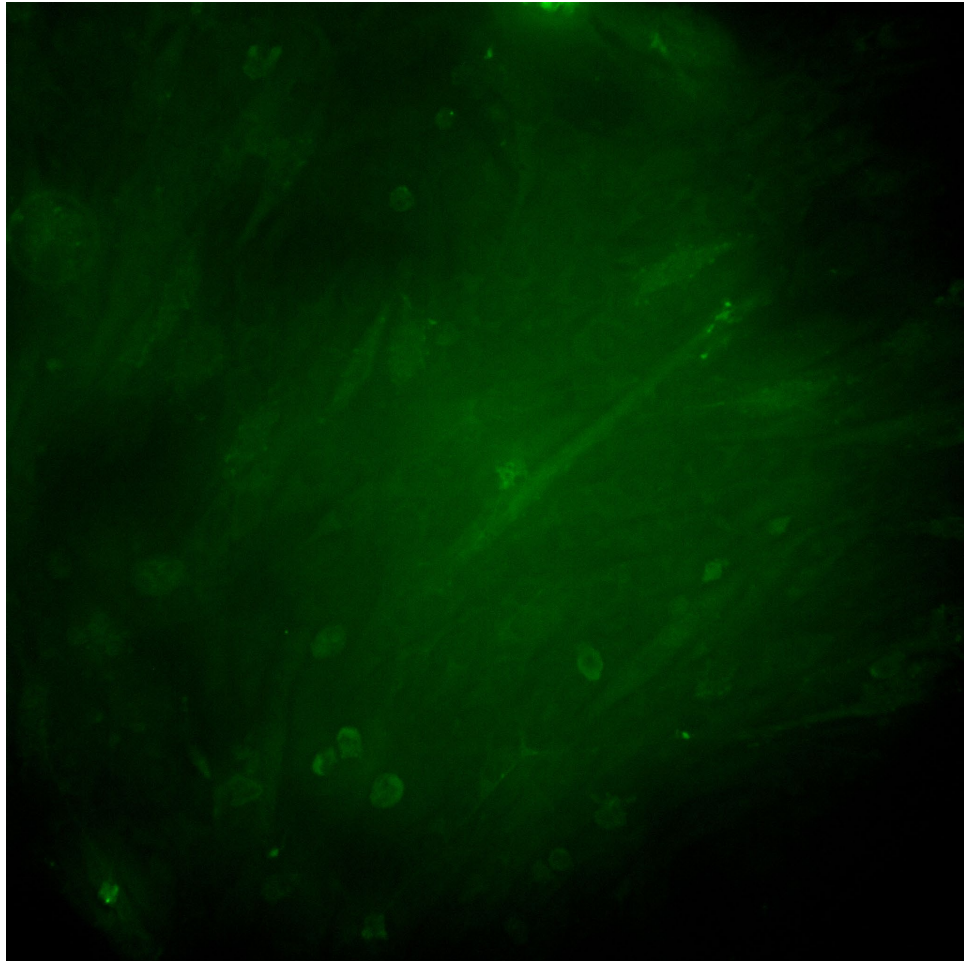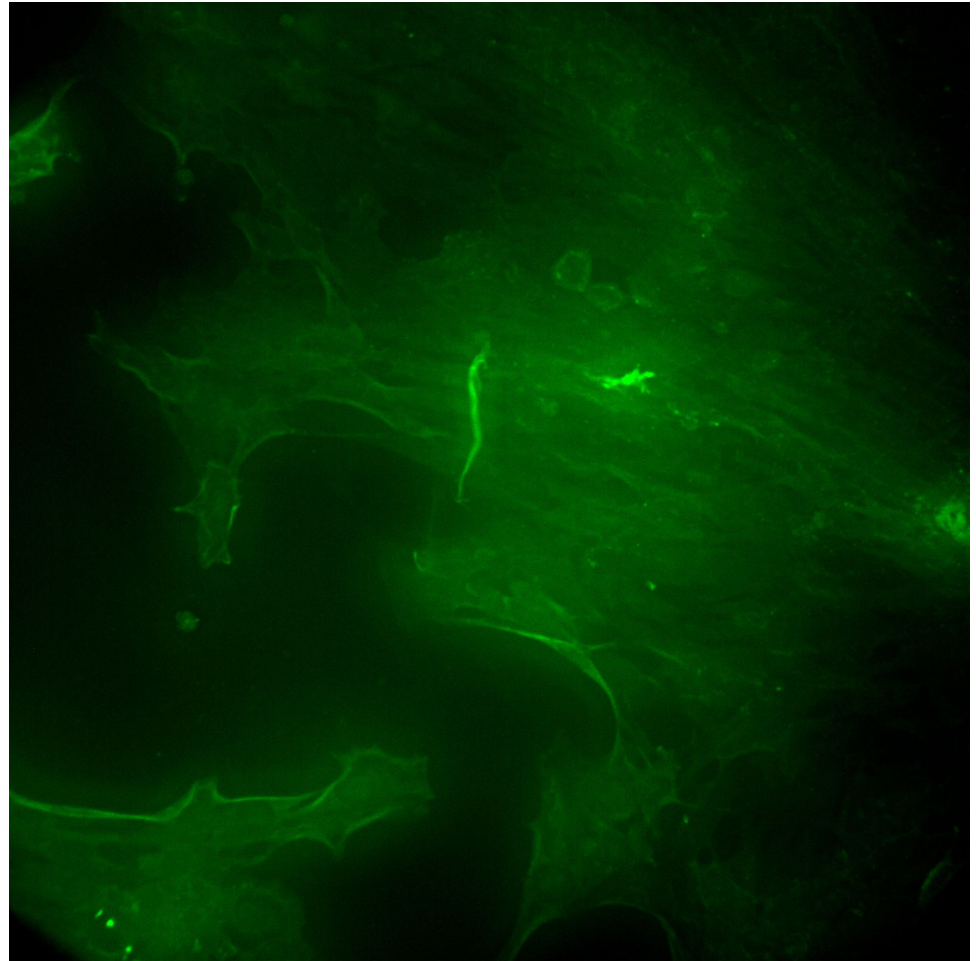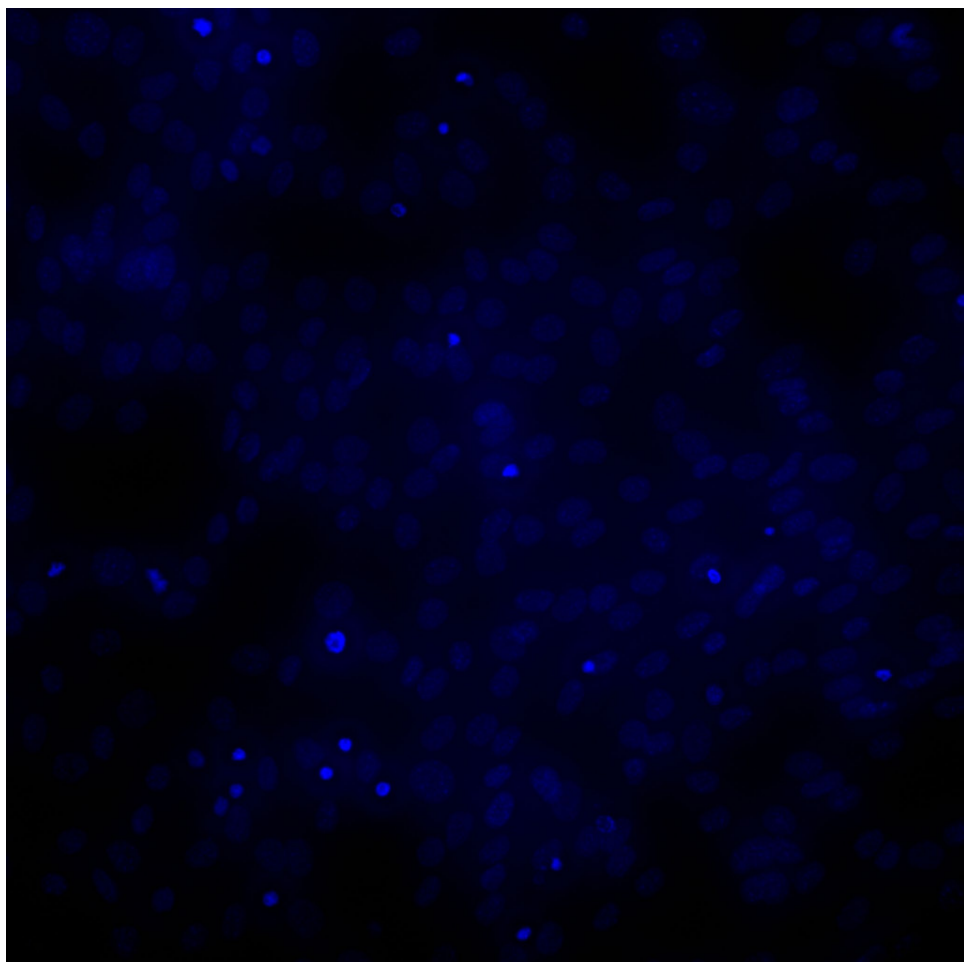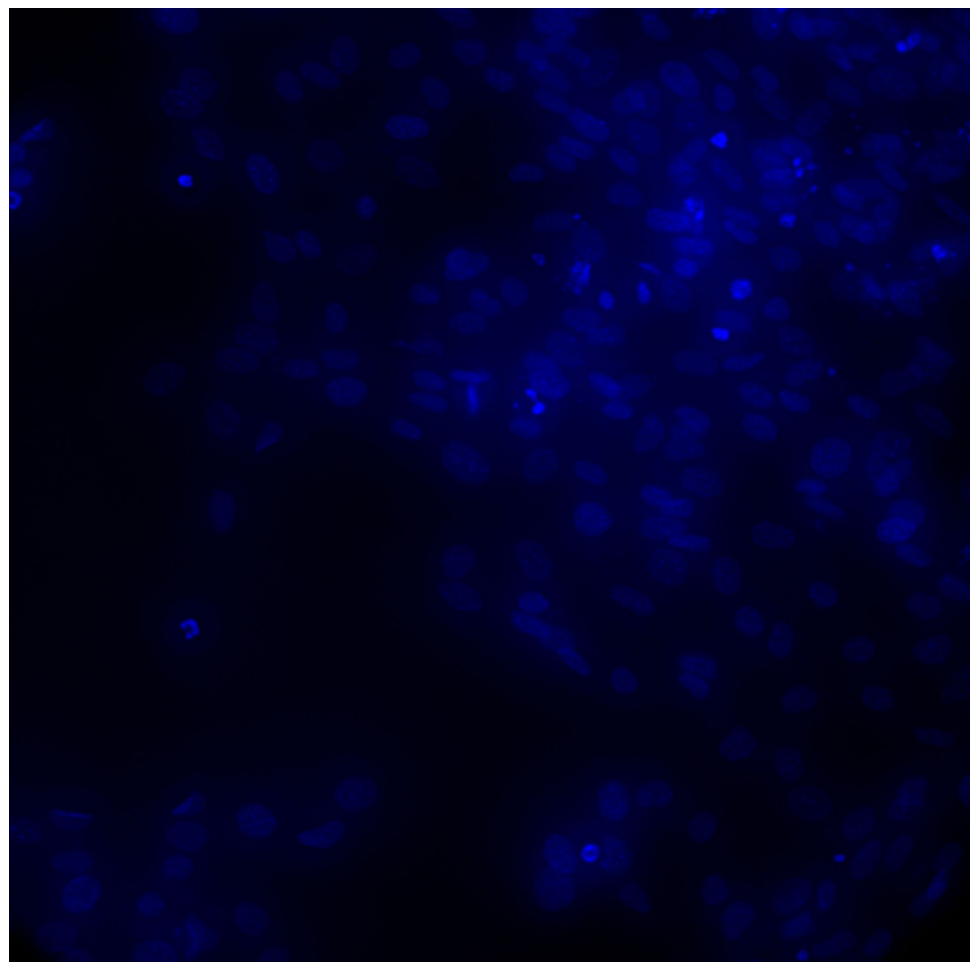



Day 4 p53

WT

2A4

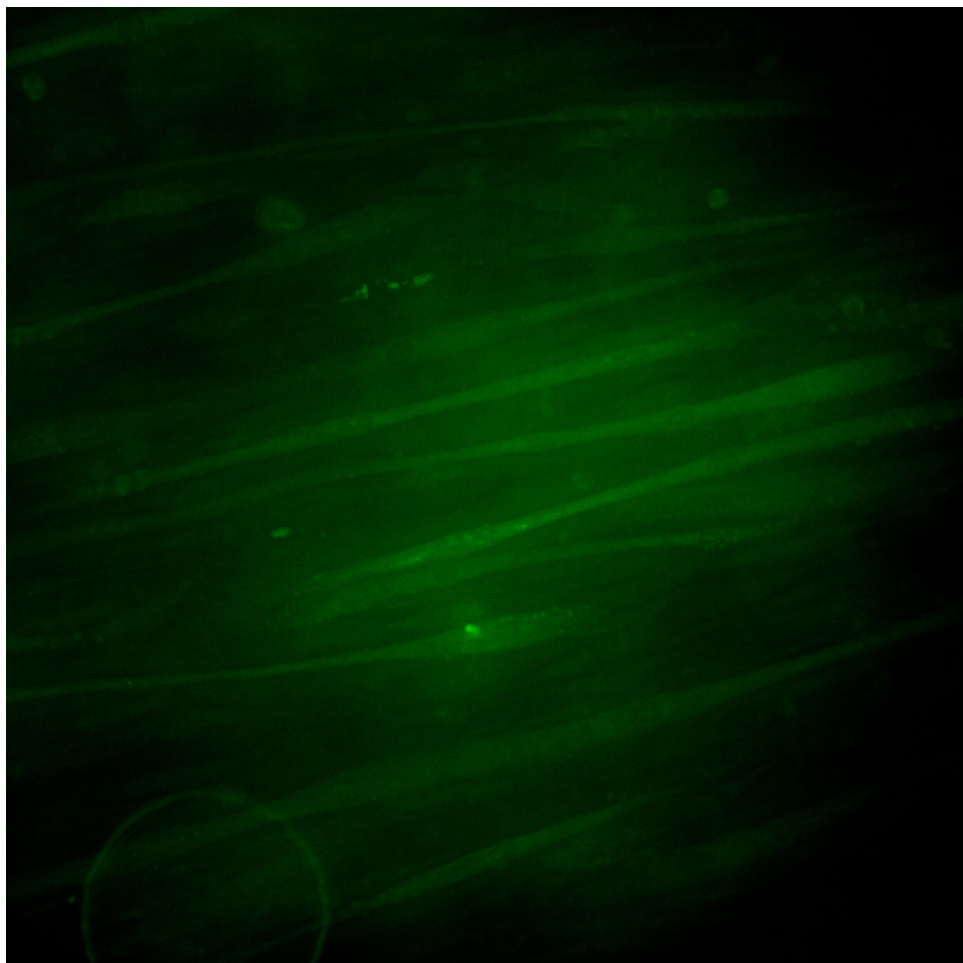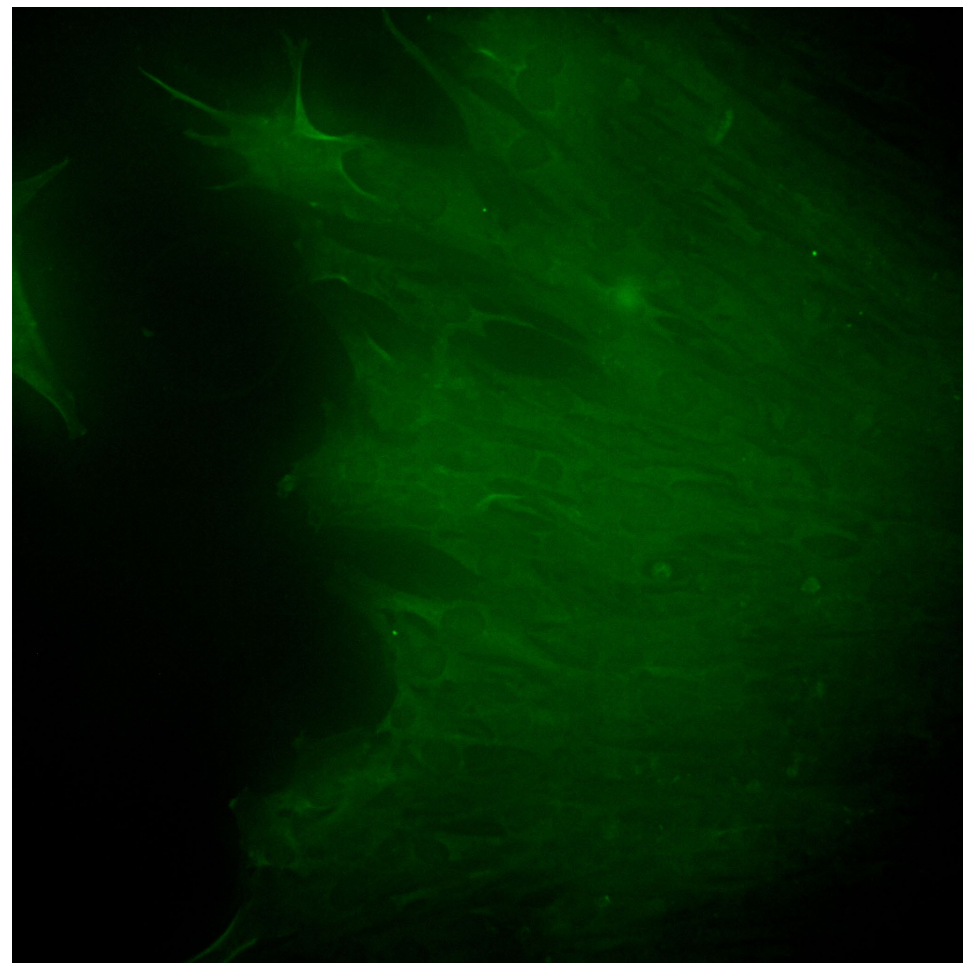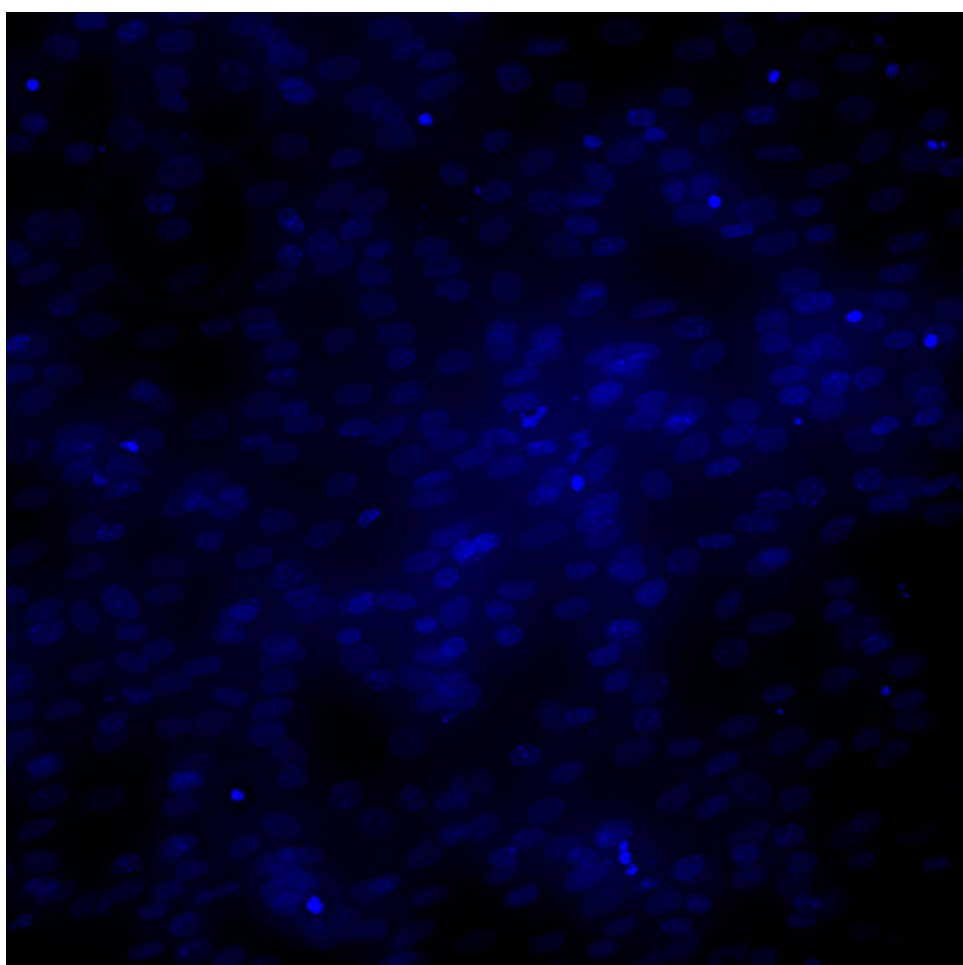



Day 0 p21

WT

2A4

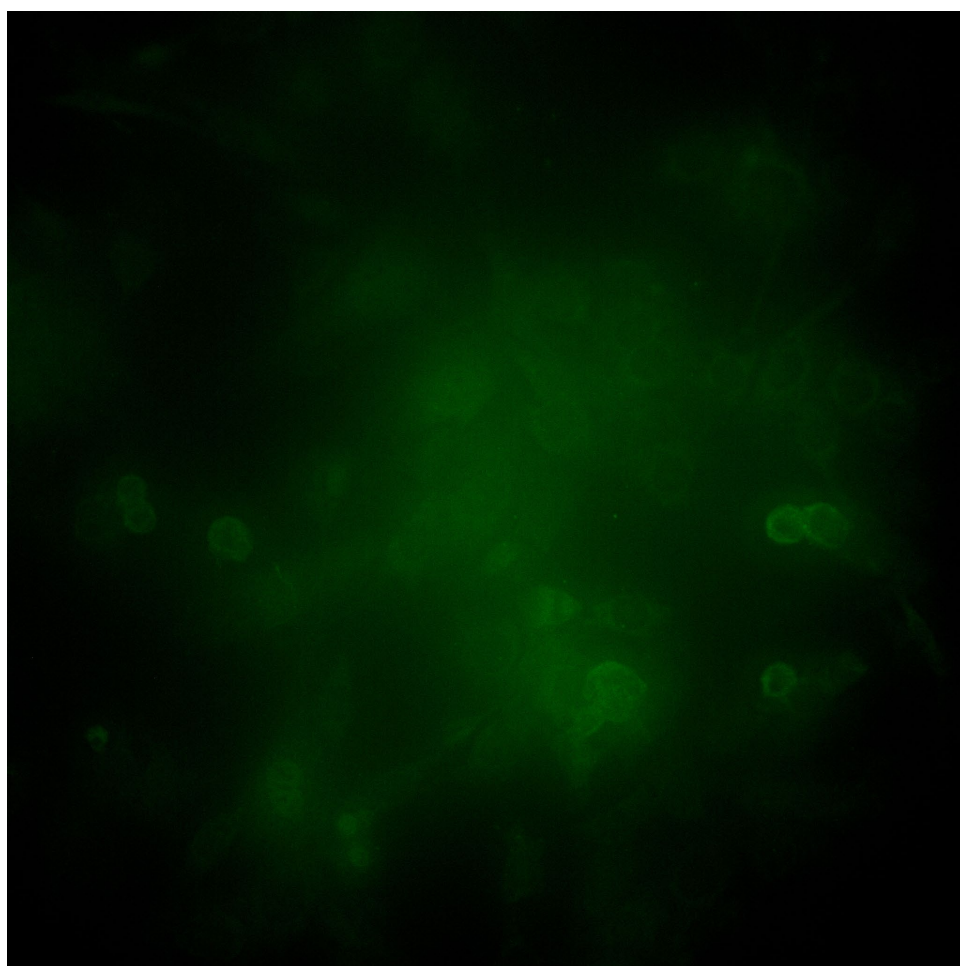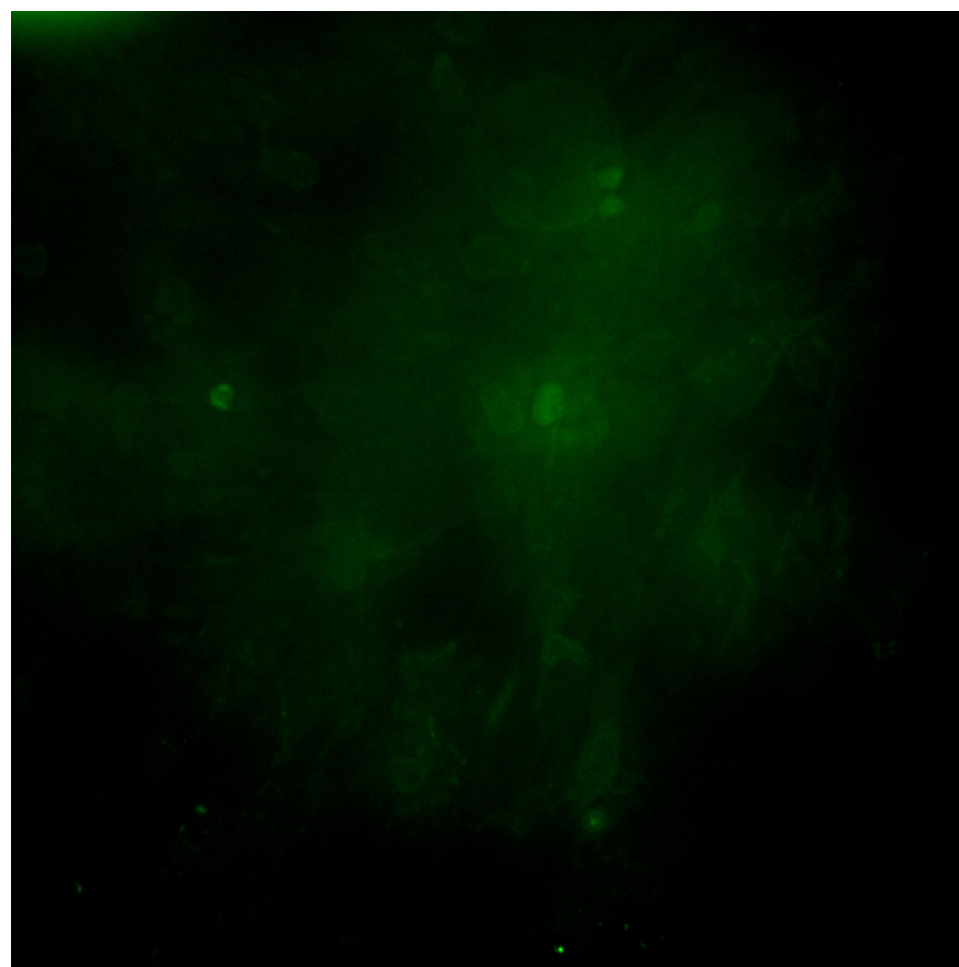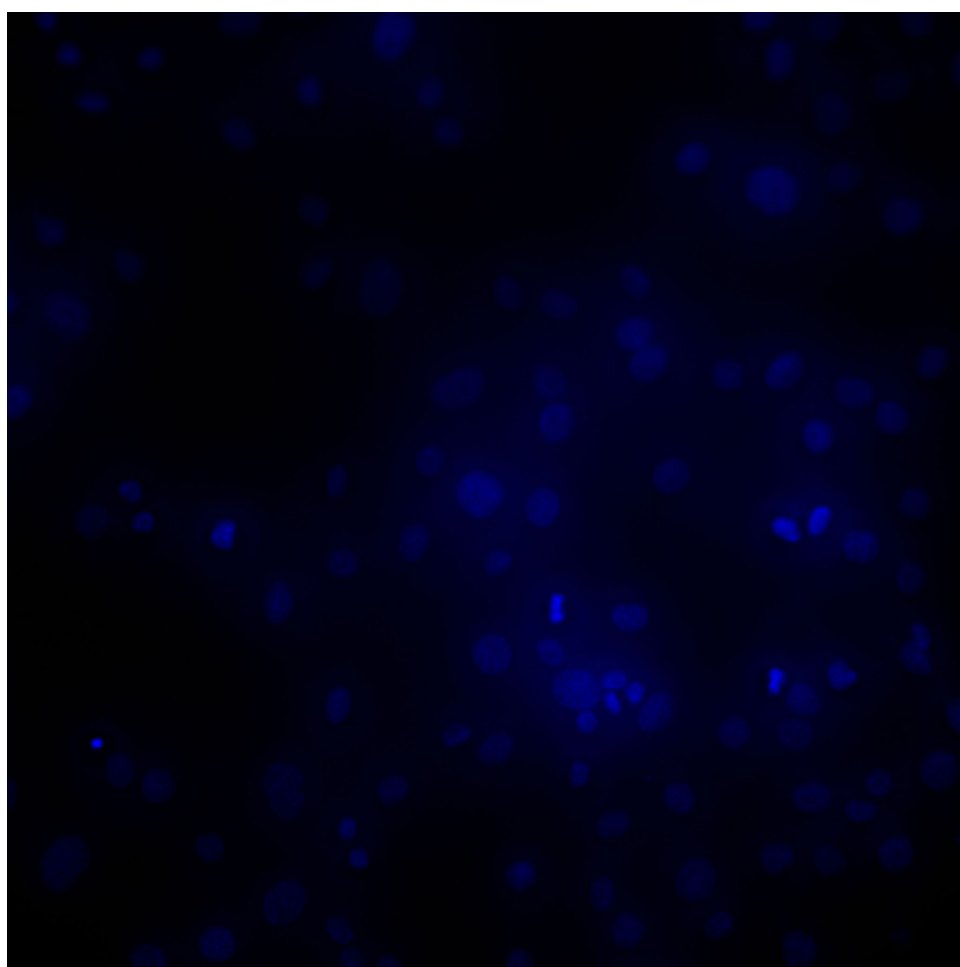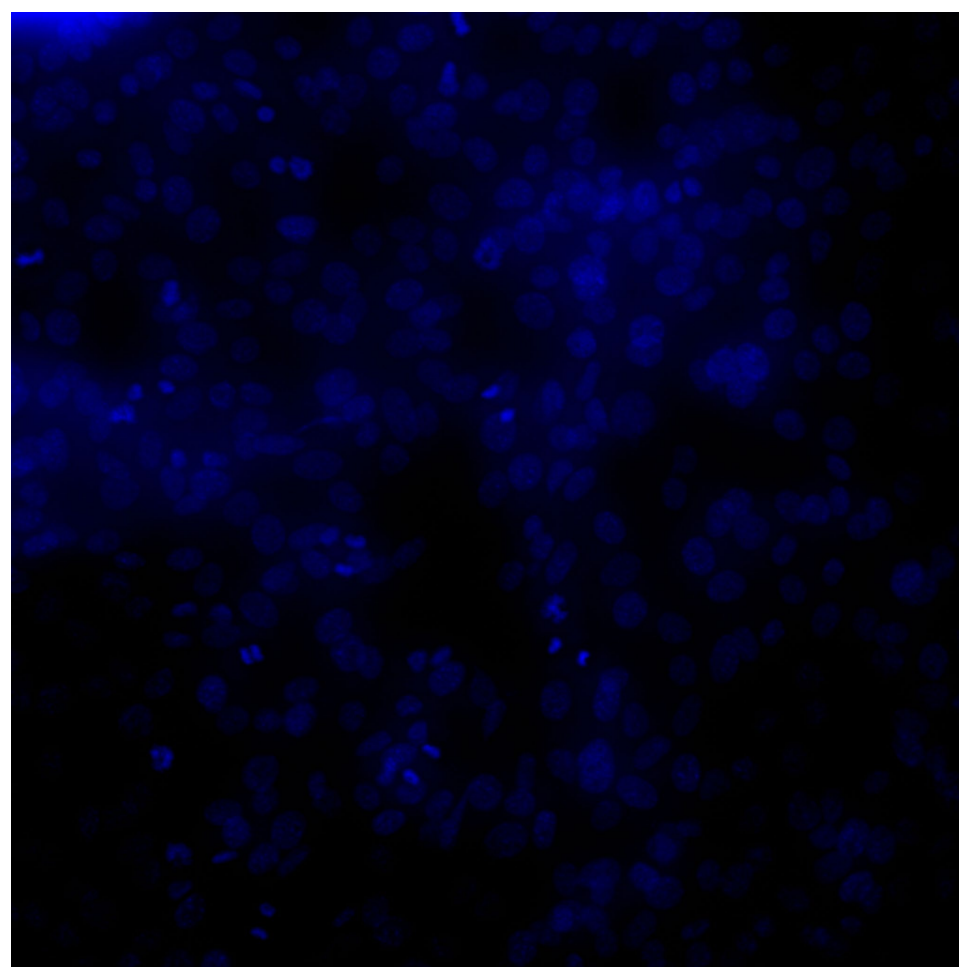



Day 1 p21

WT

2A4

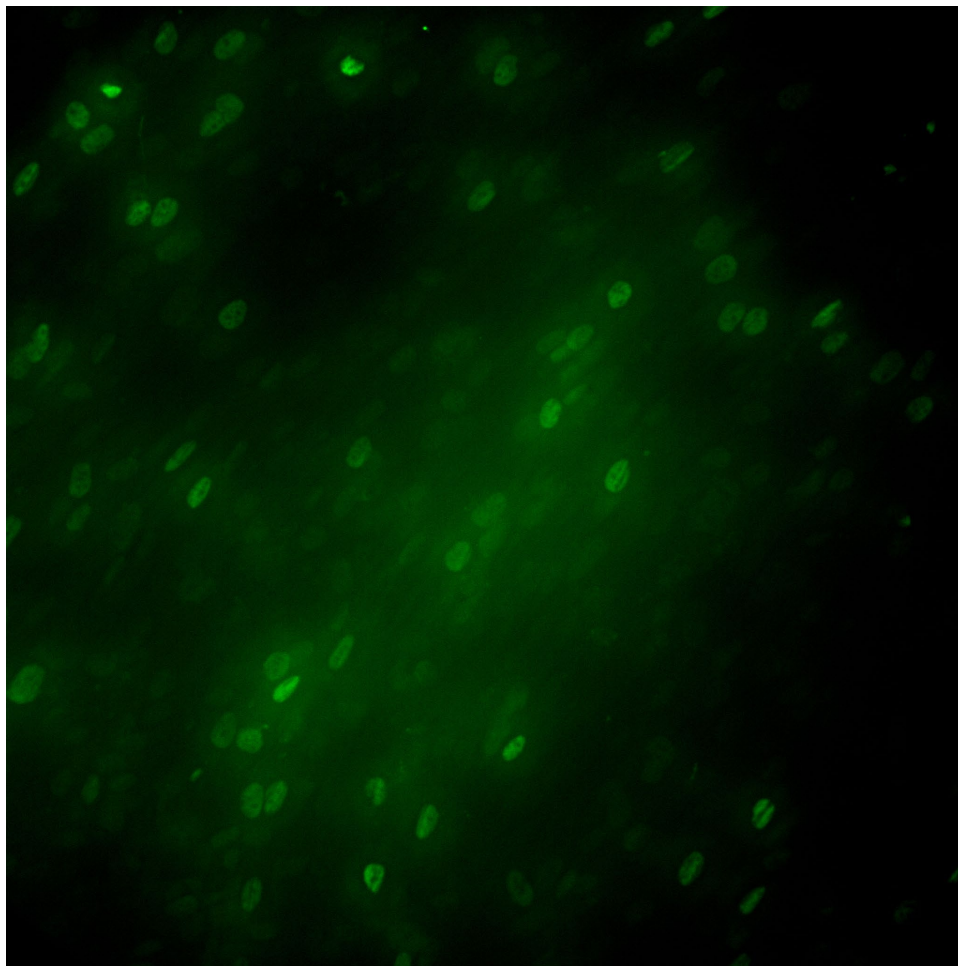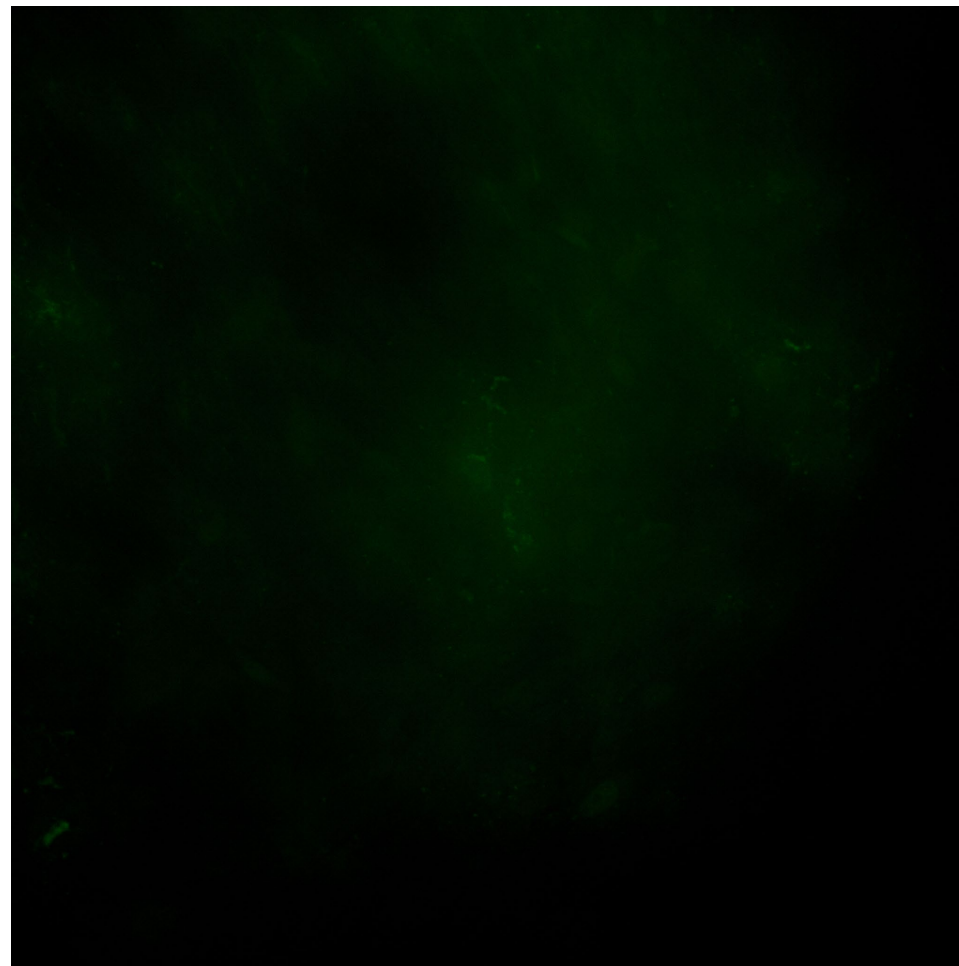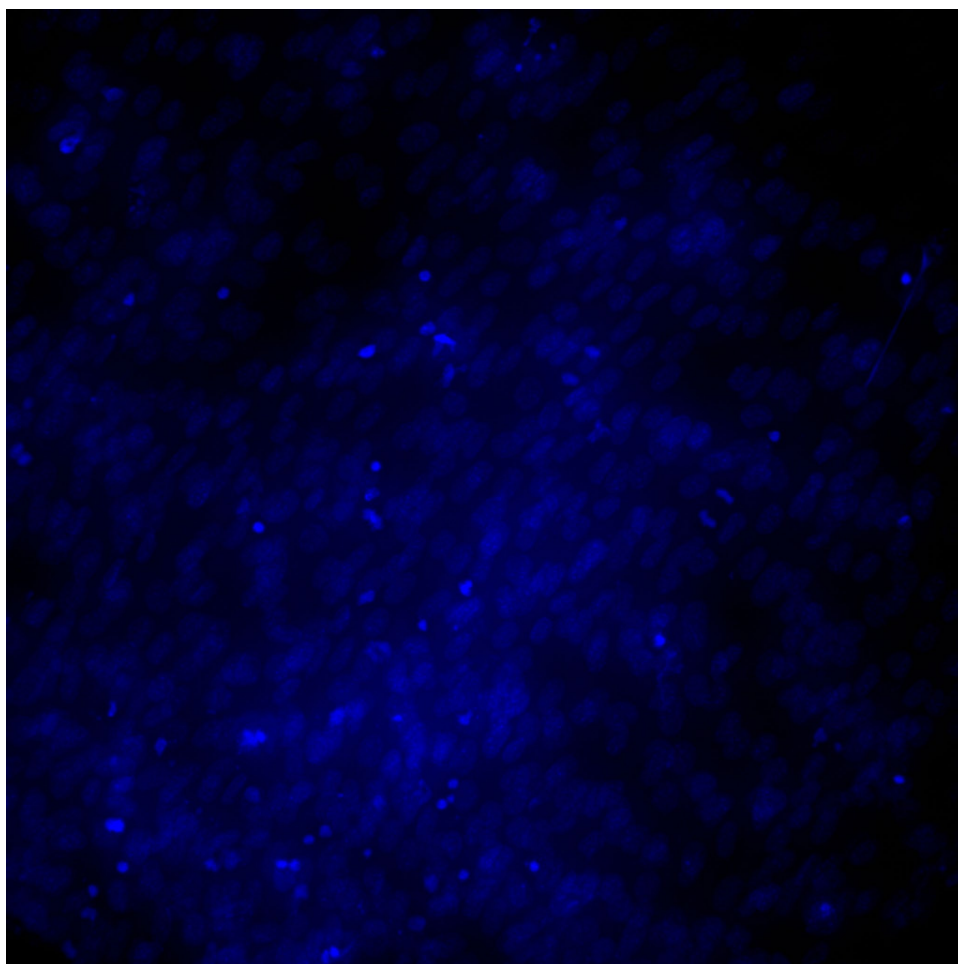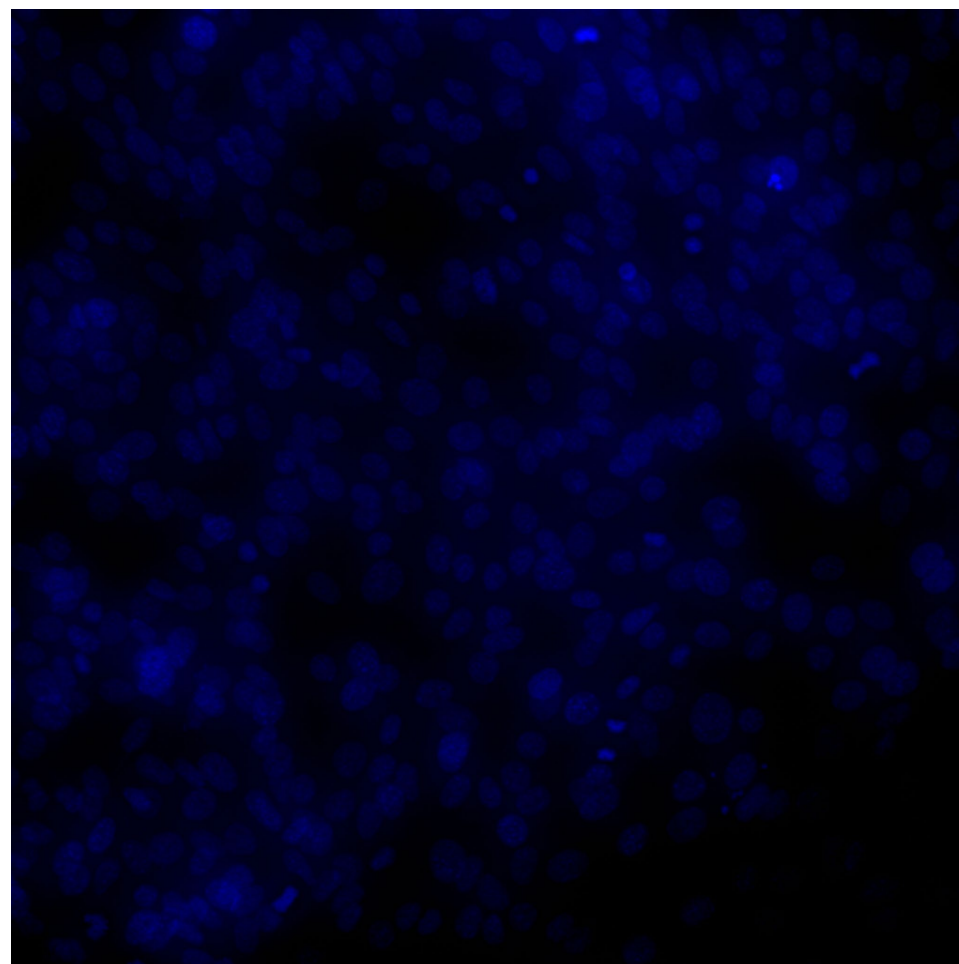



Day 2 p21

WT

2A4

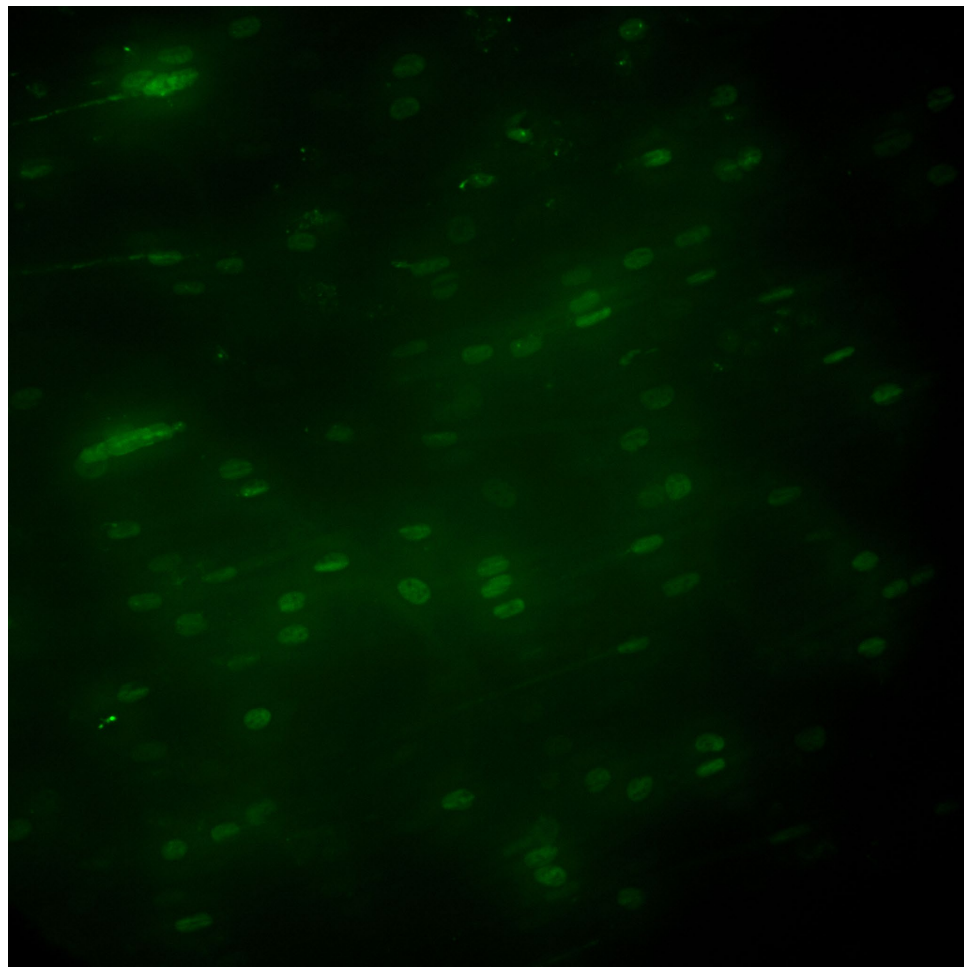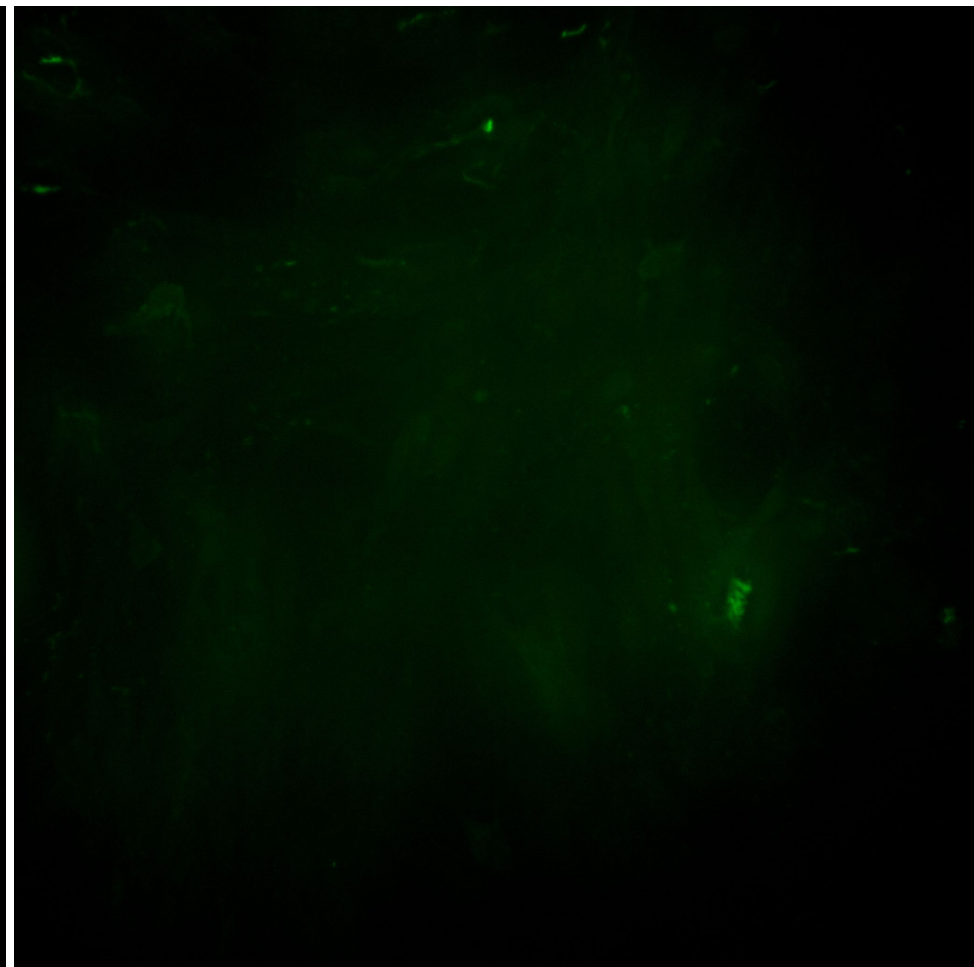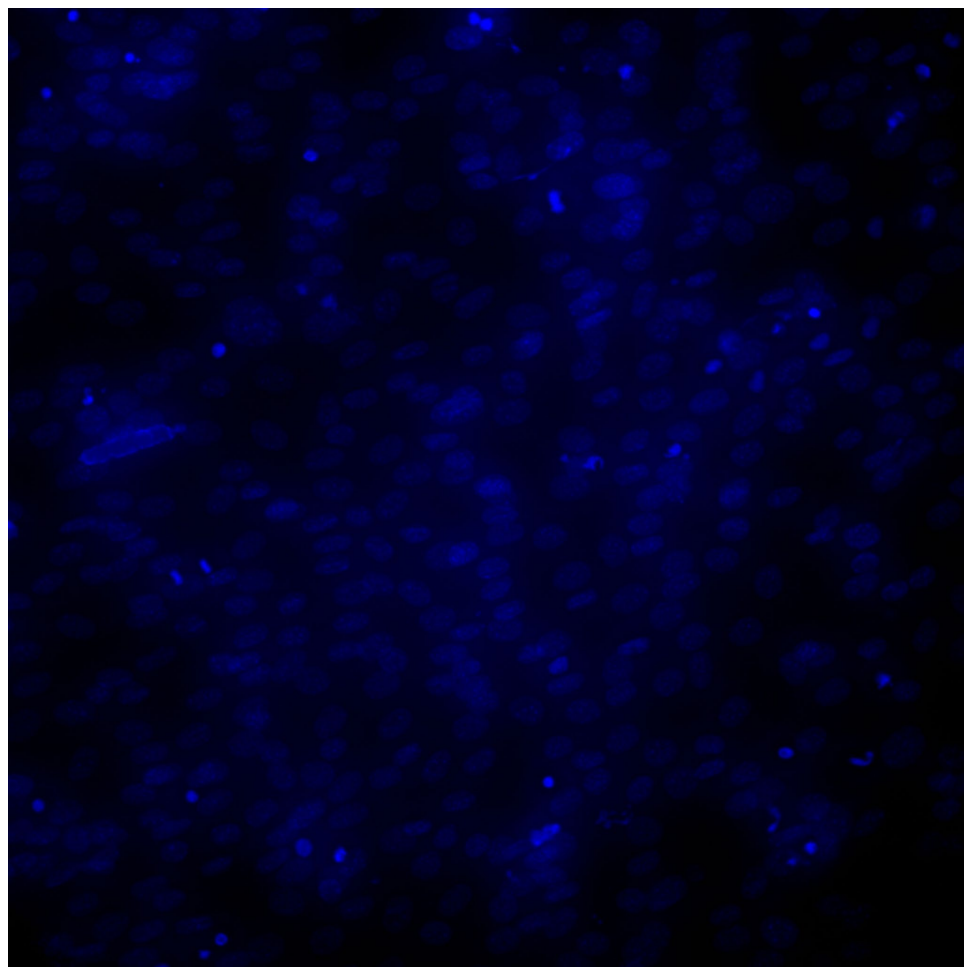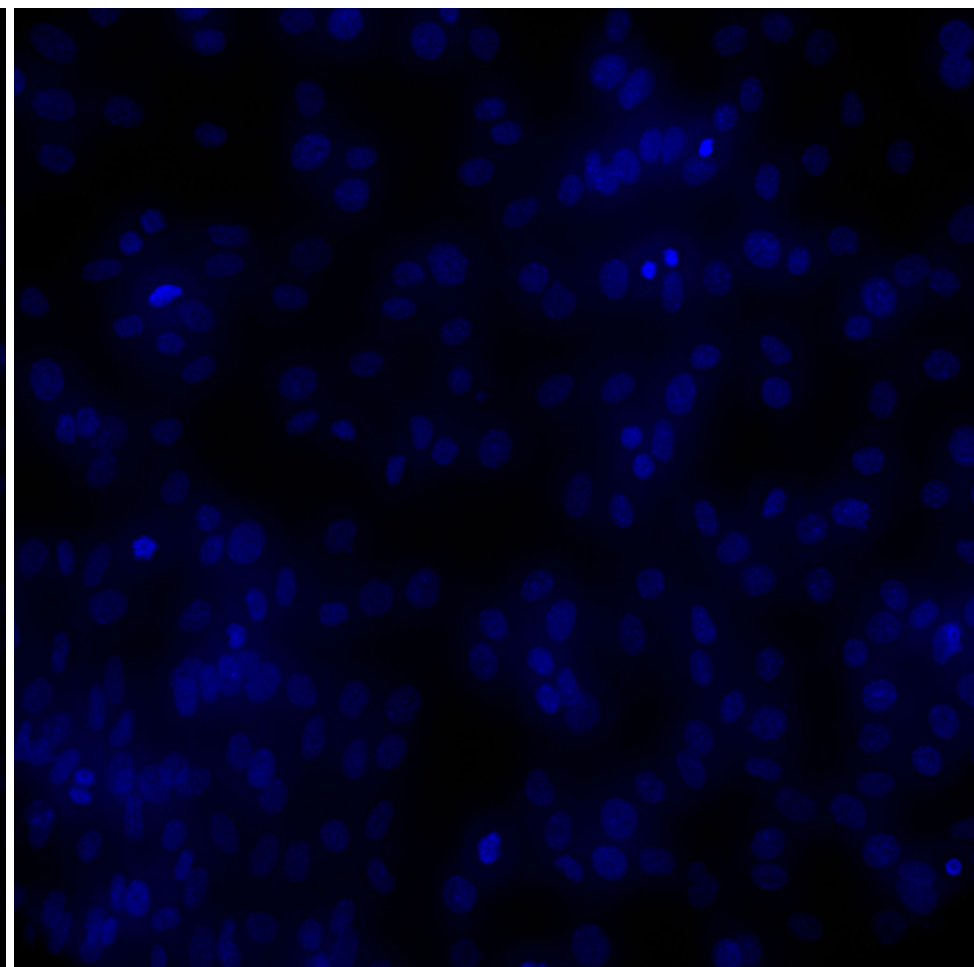



Day 3 p21

WT

2A4

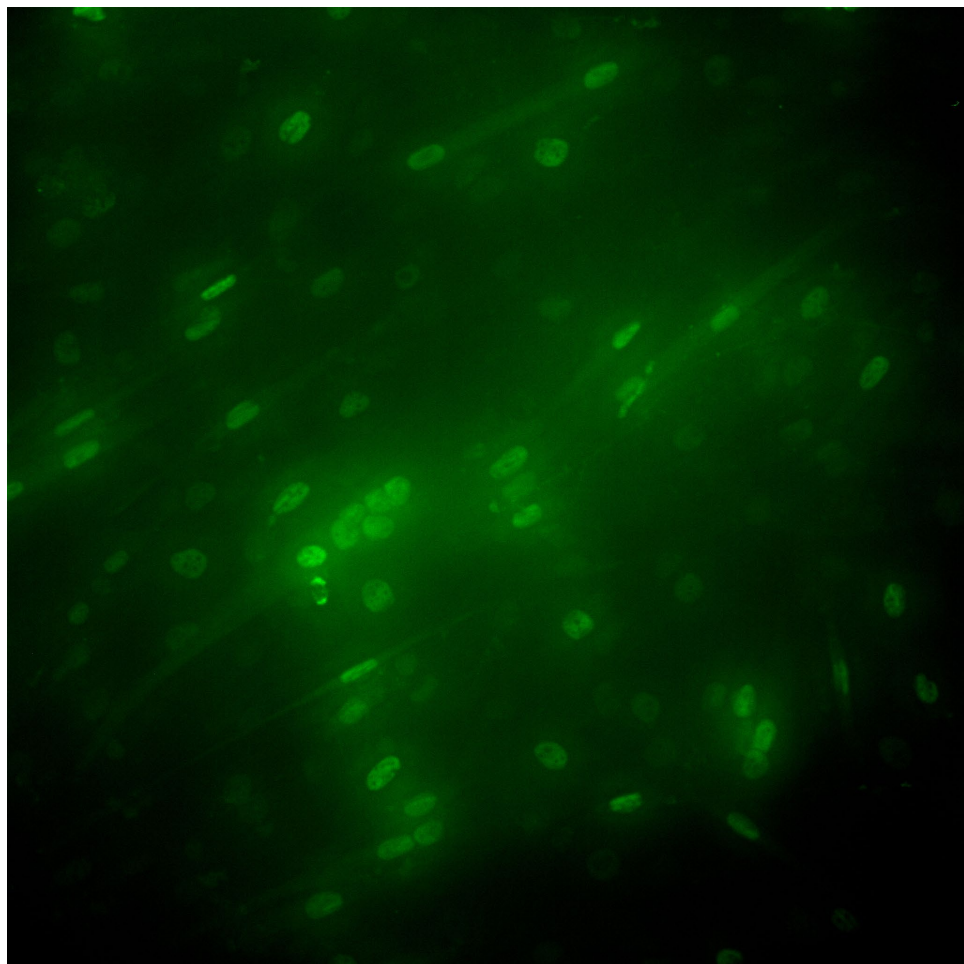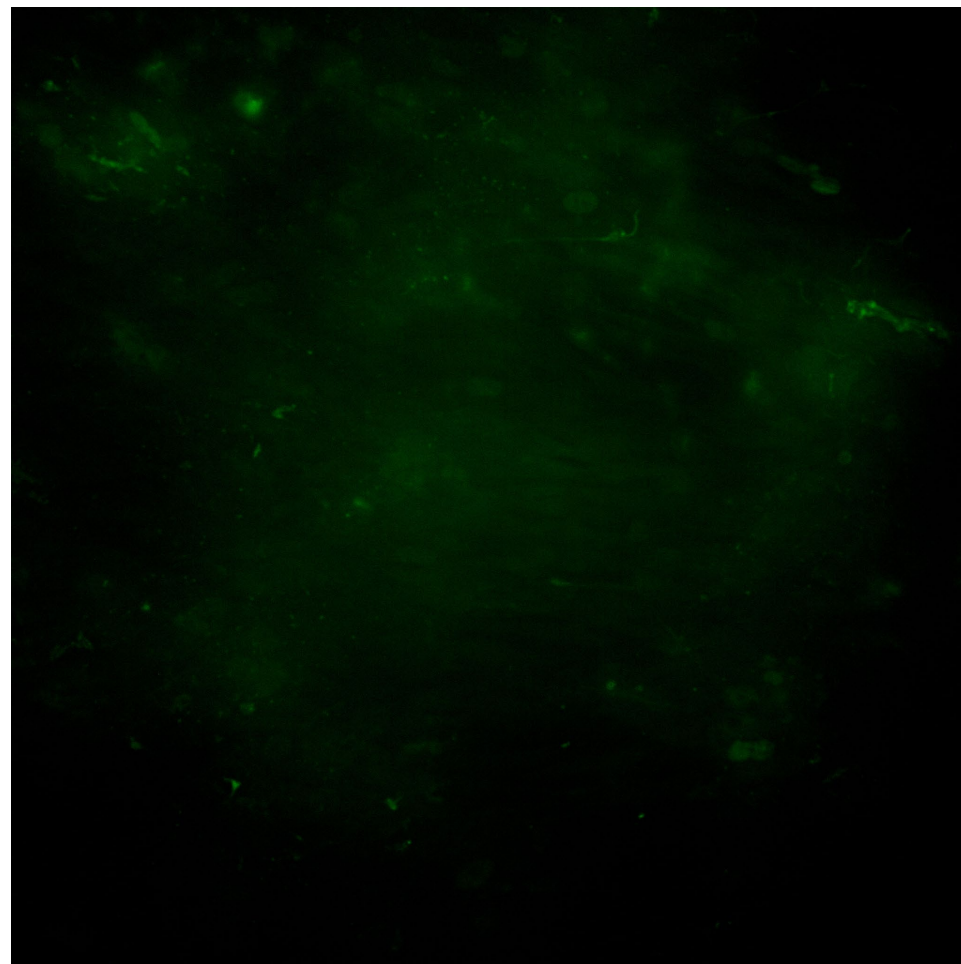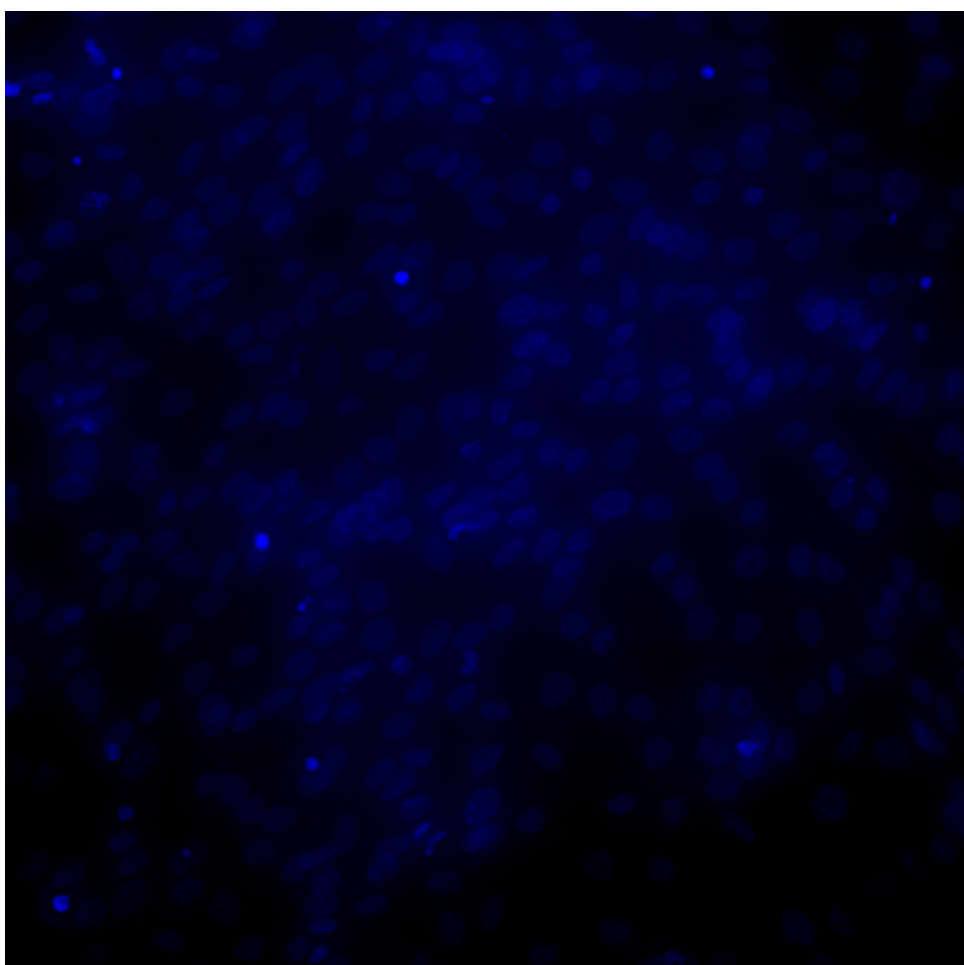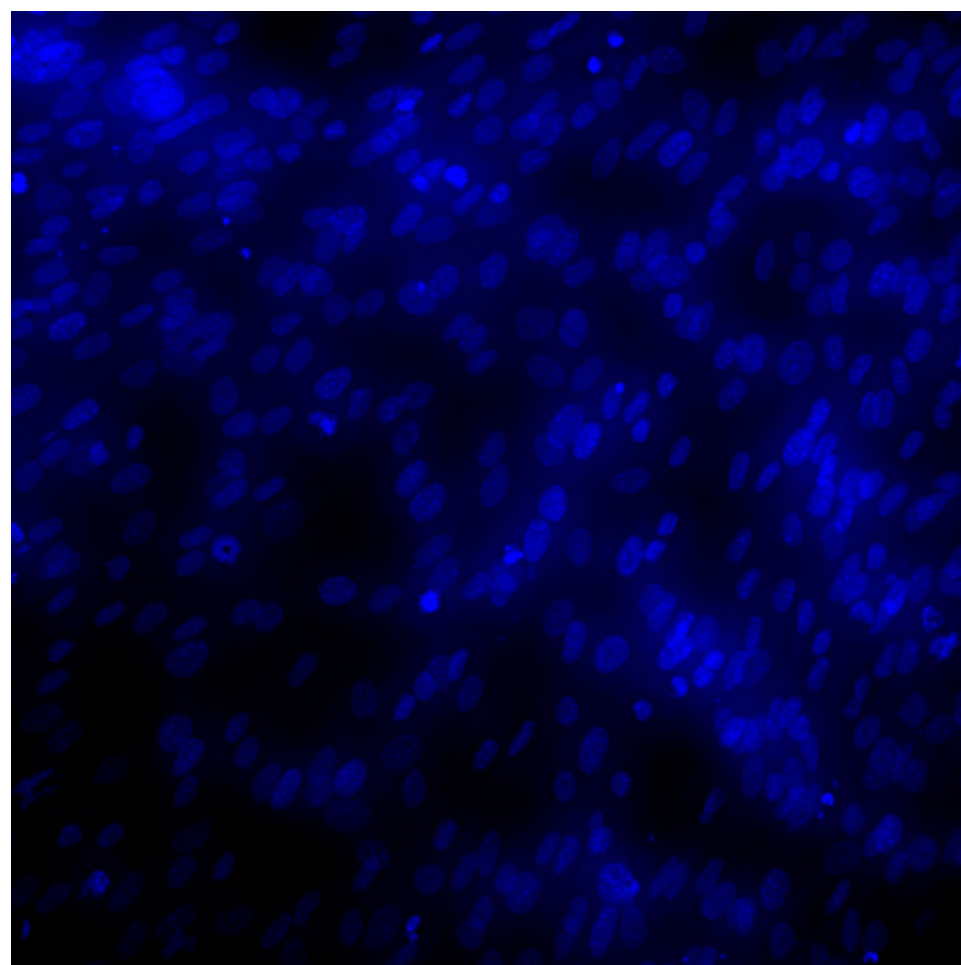



Day 4 p21

WT

2A4

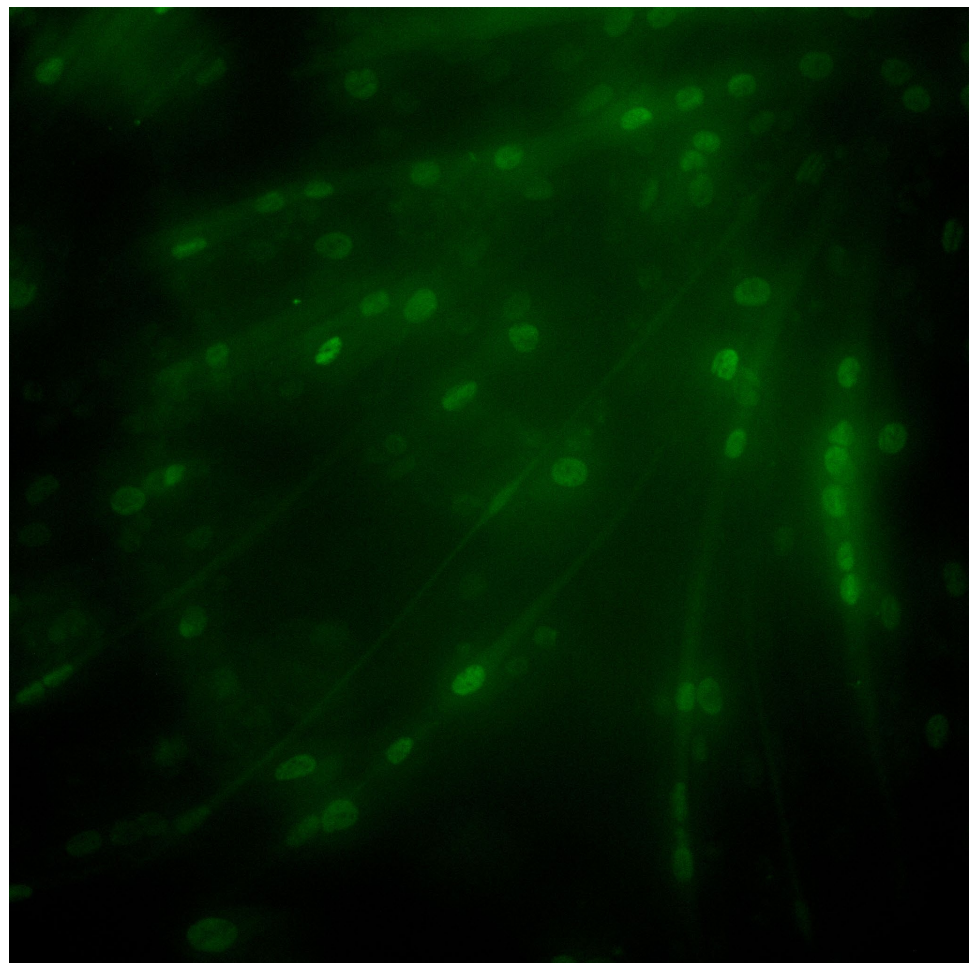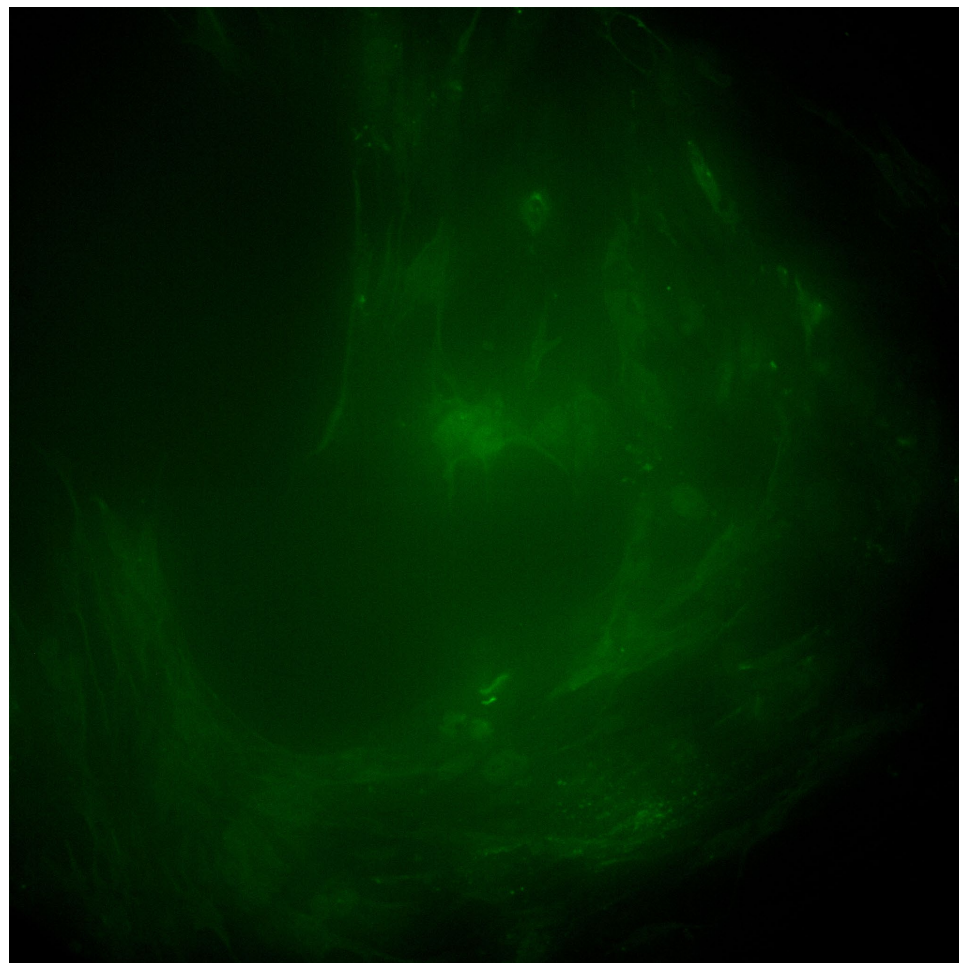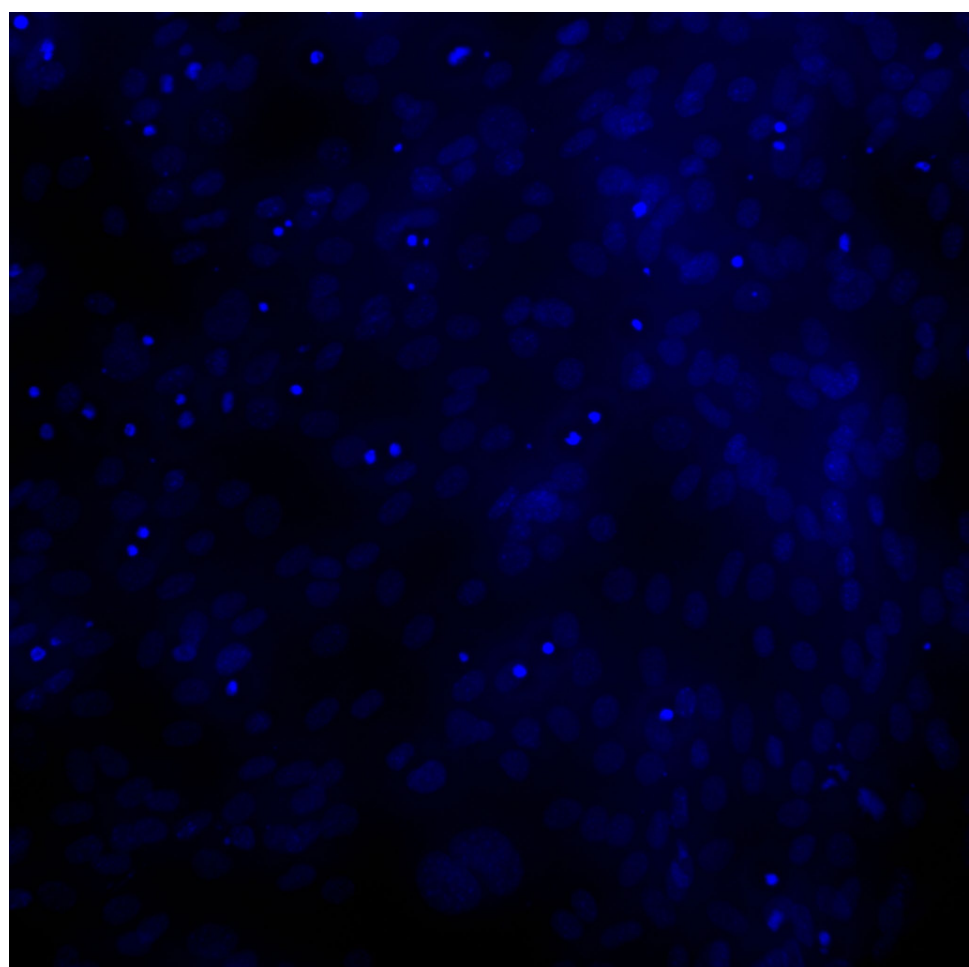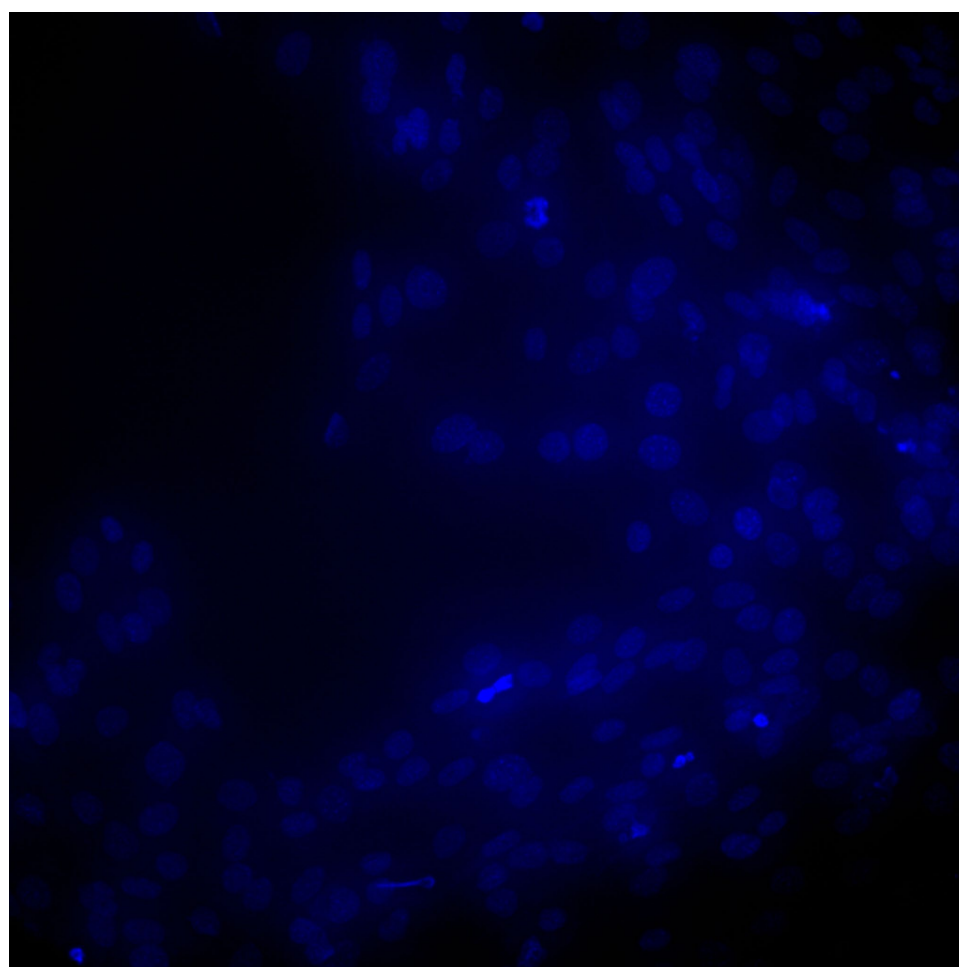



# Day 0 MyoD

WT

2A4

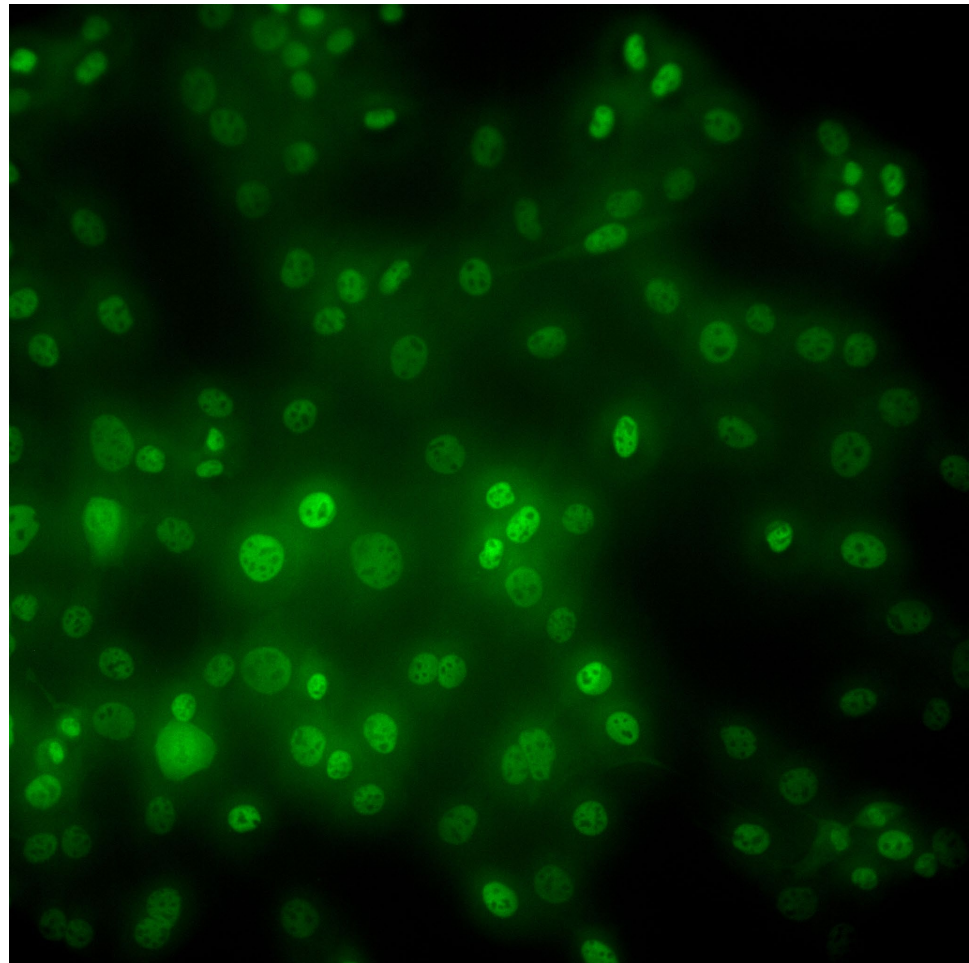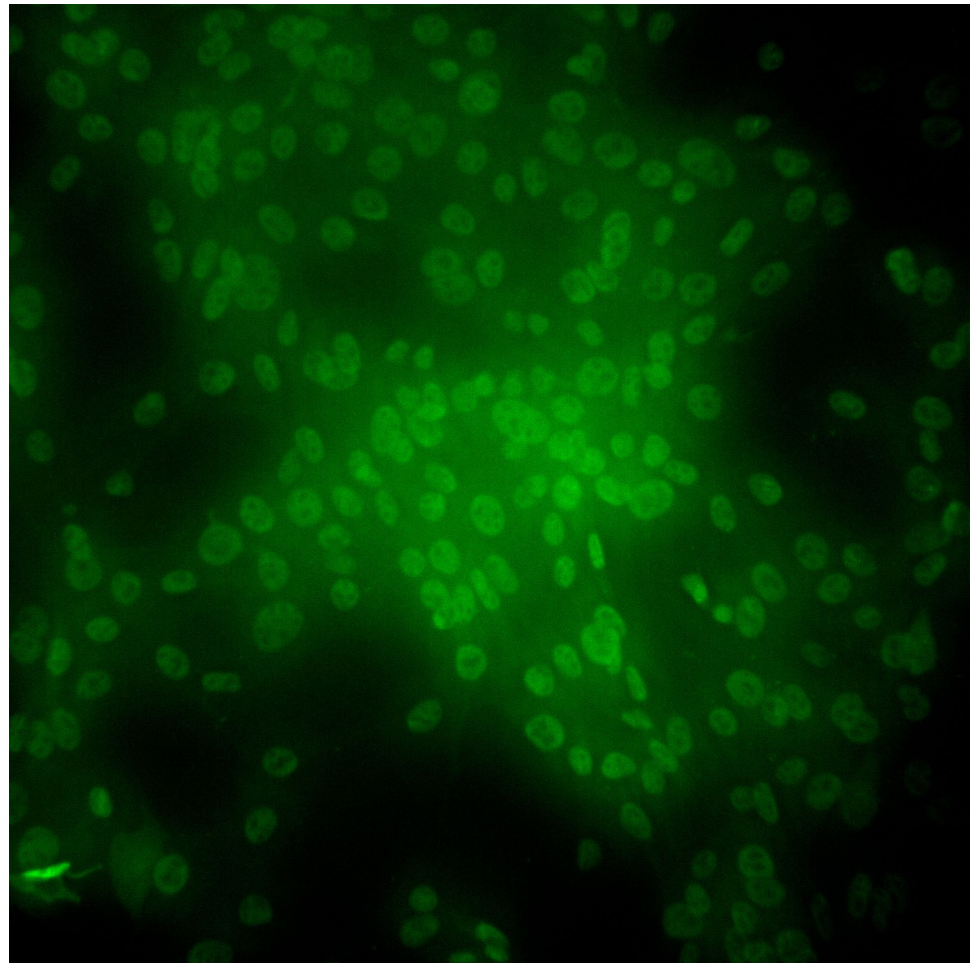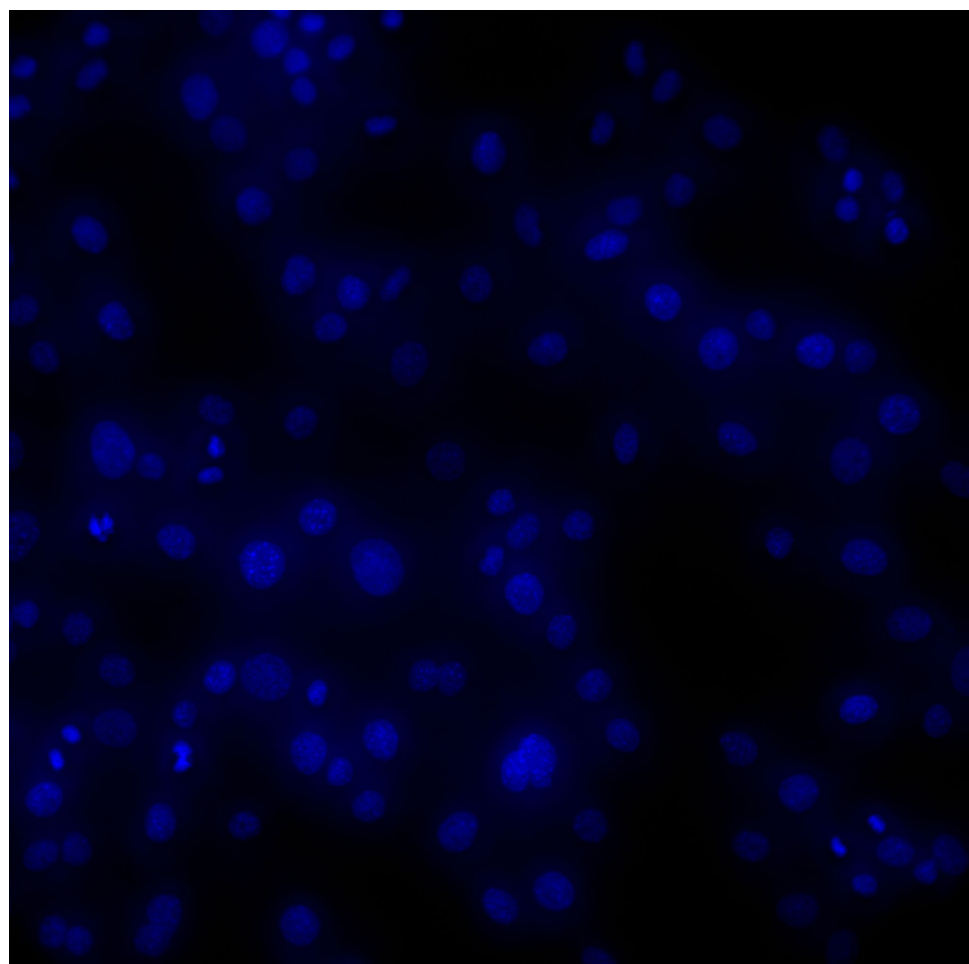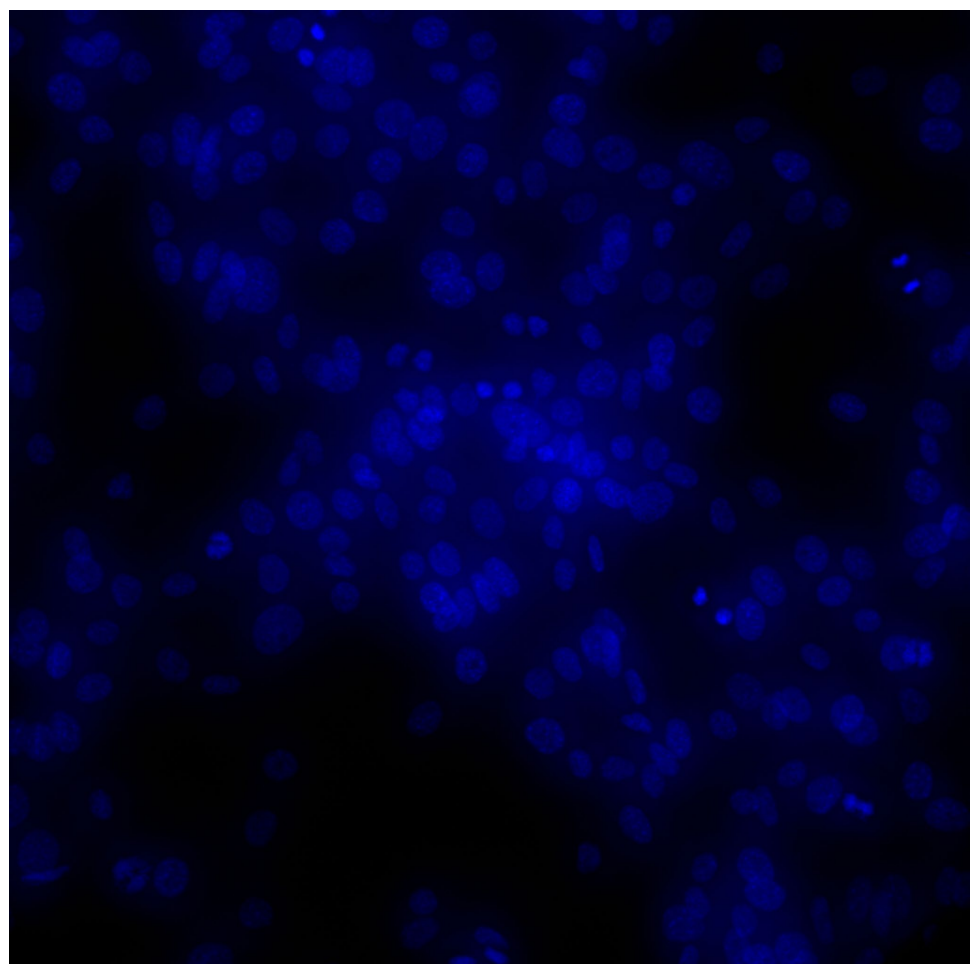



# Day 1 MyoD

WT

2A4

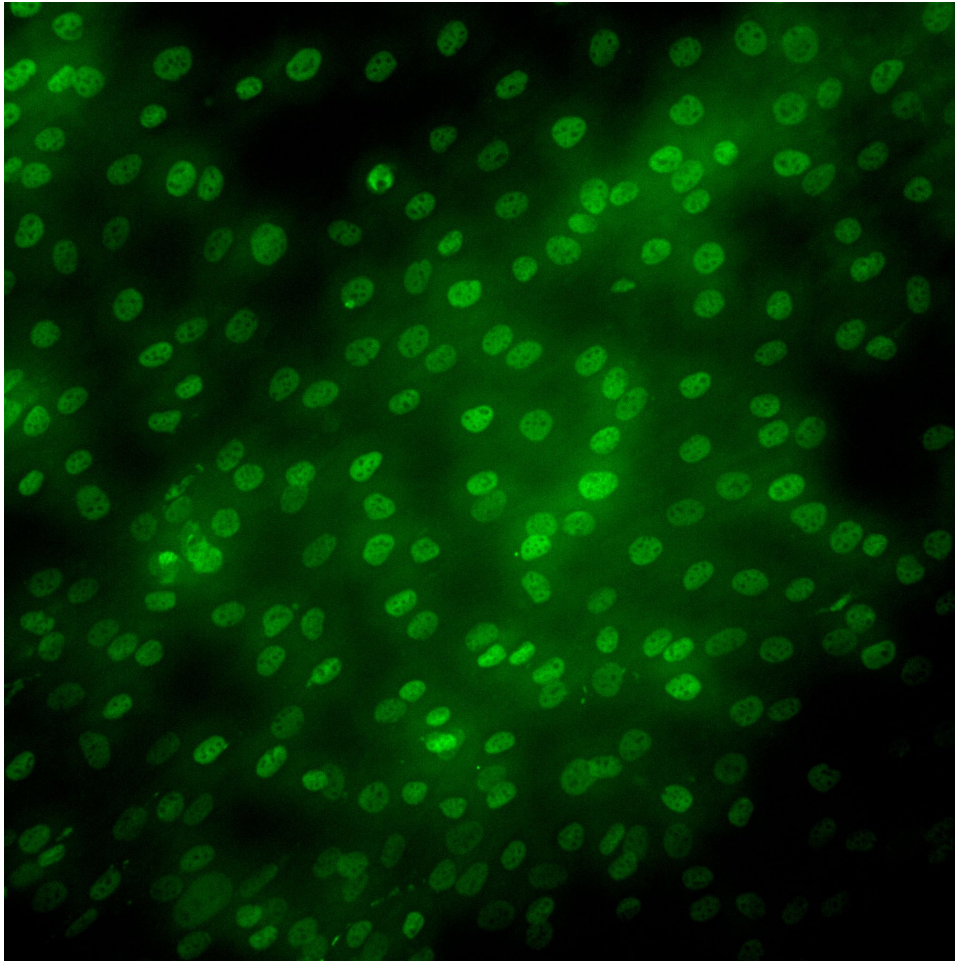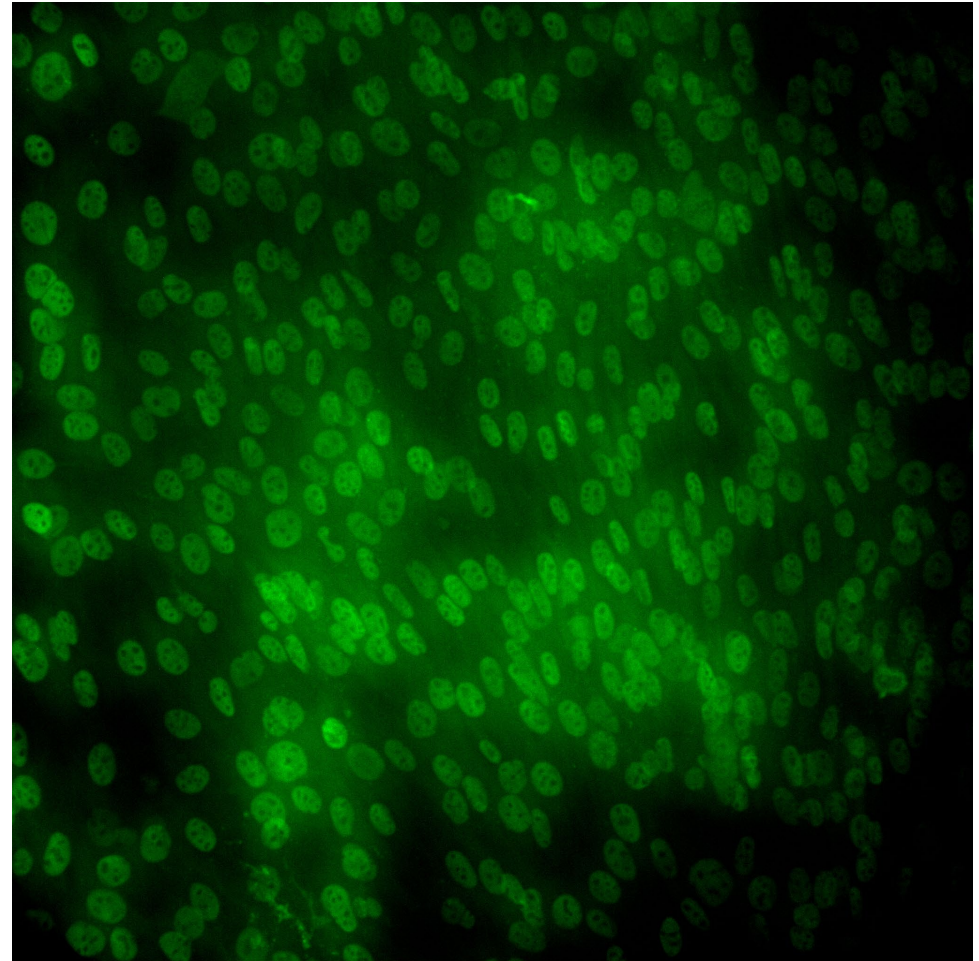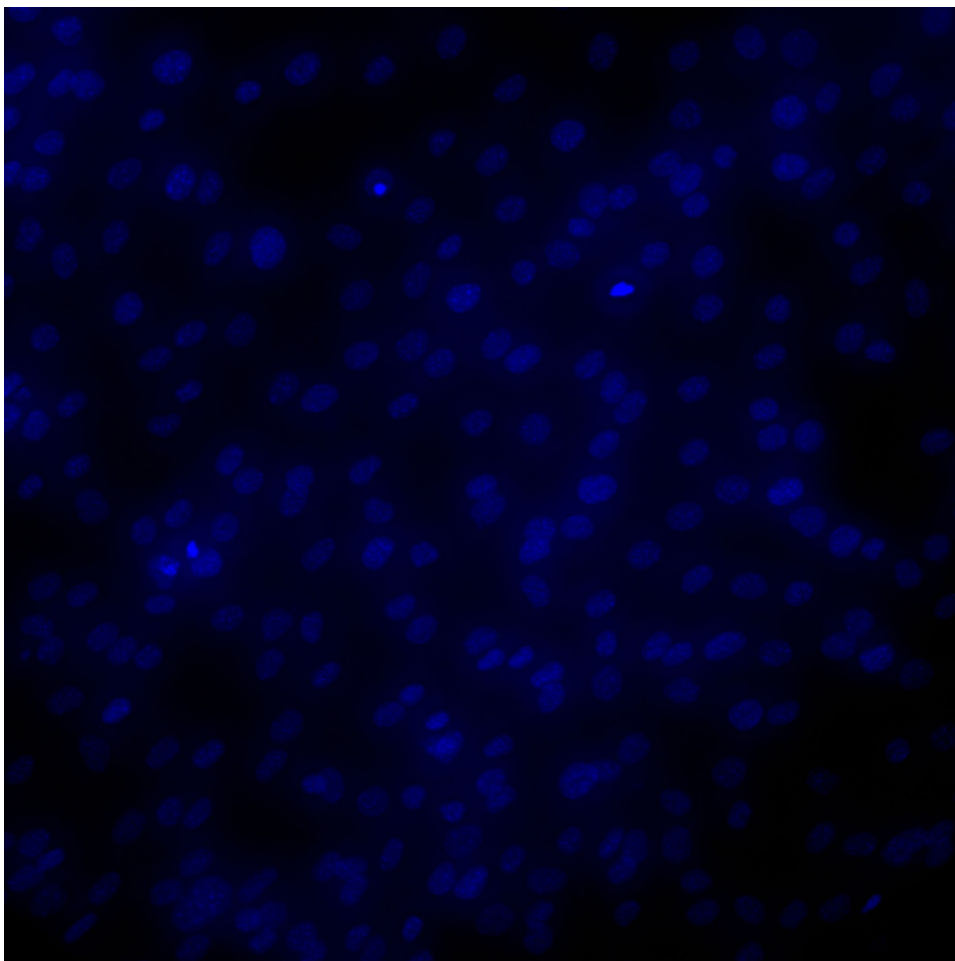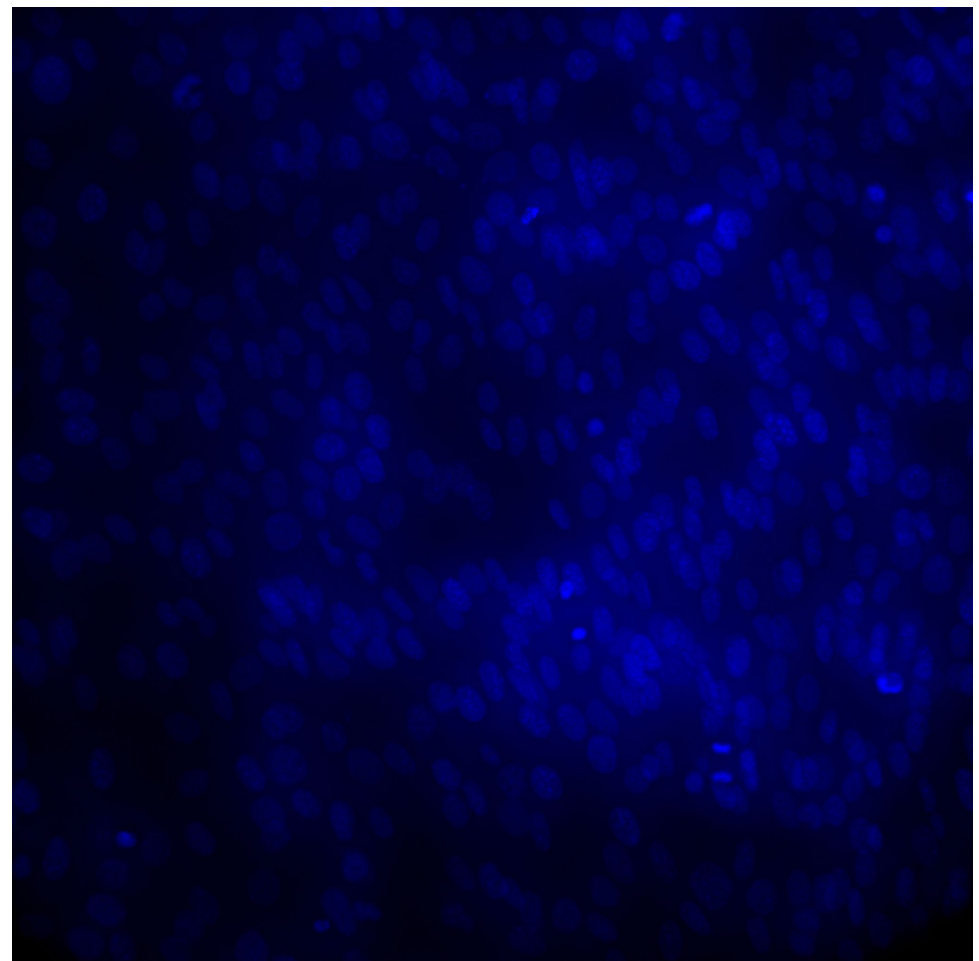



# Day 2 MyoD

WT

2A4

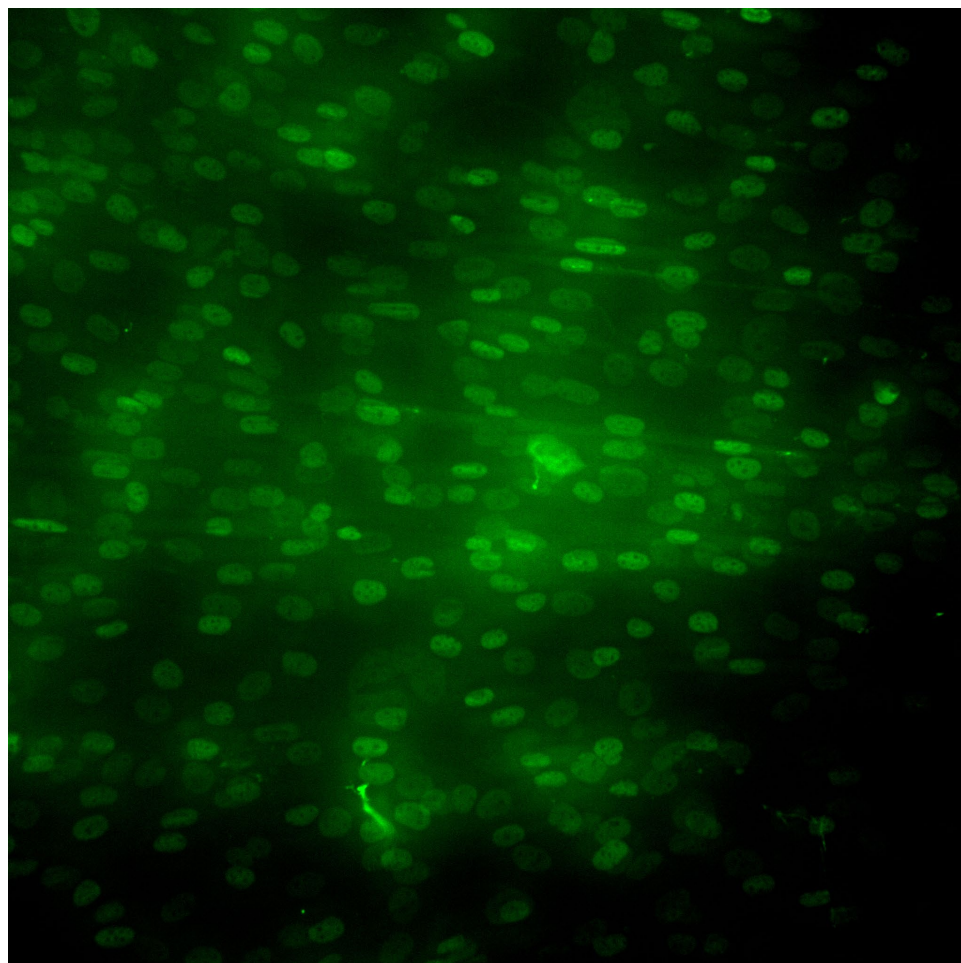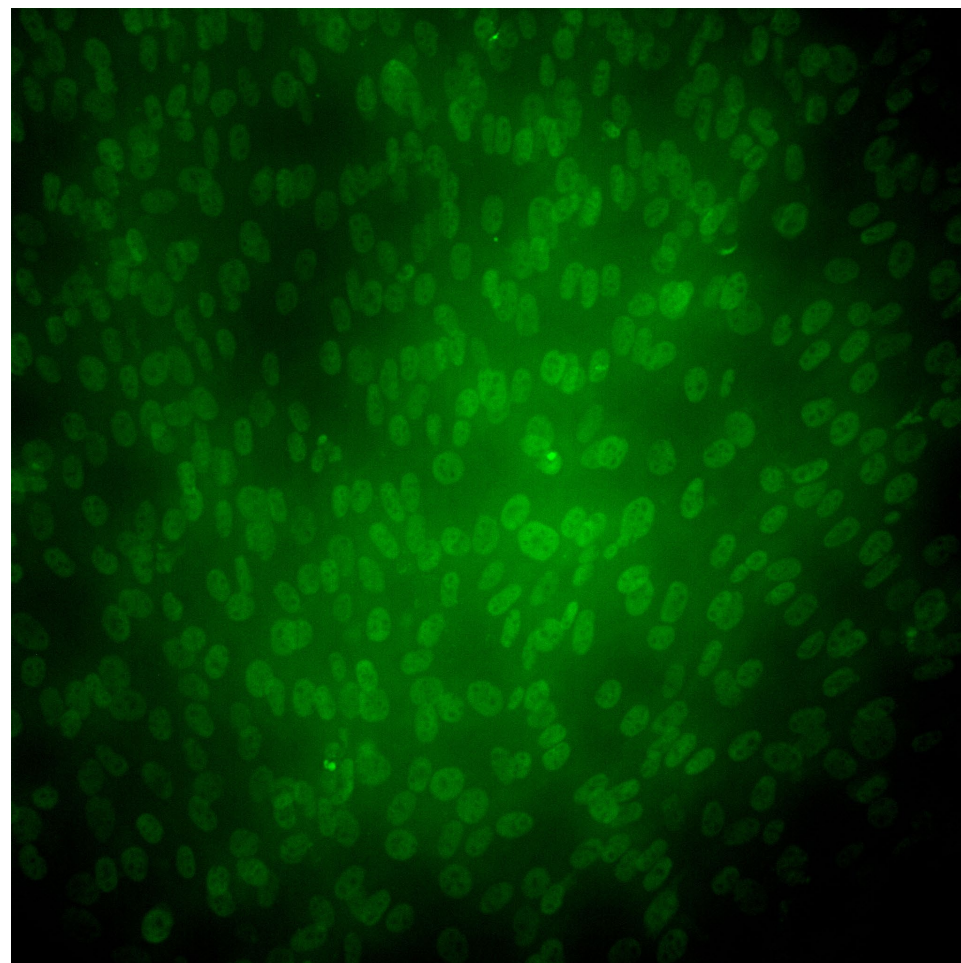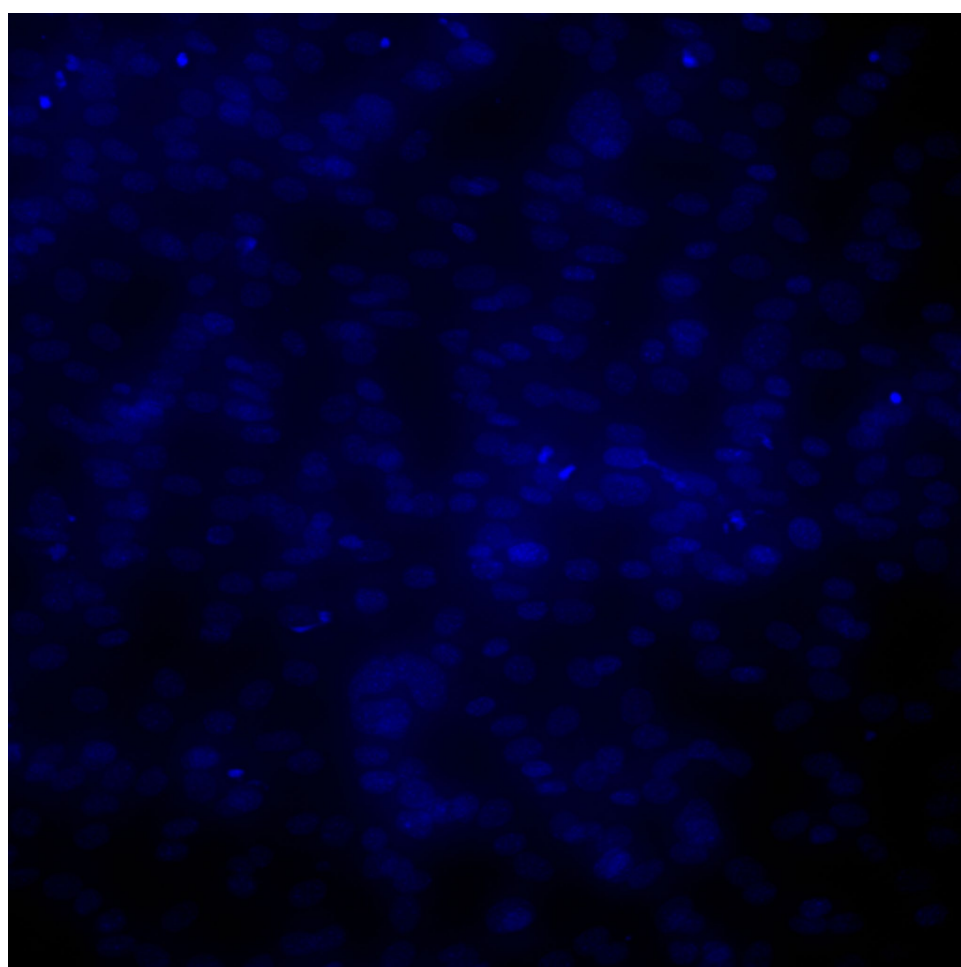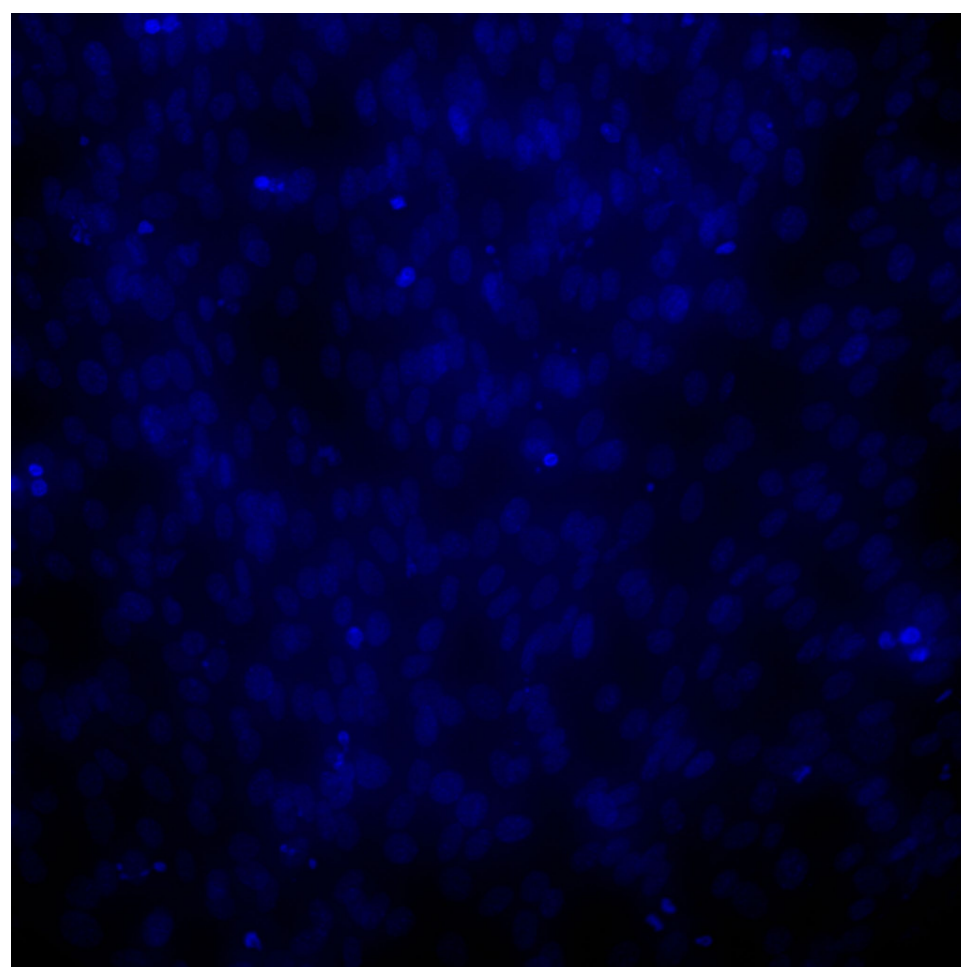



# Day 3 MyoD

WT

2A4

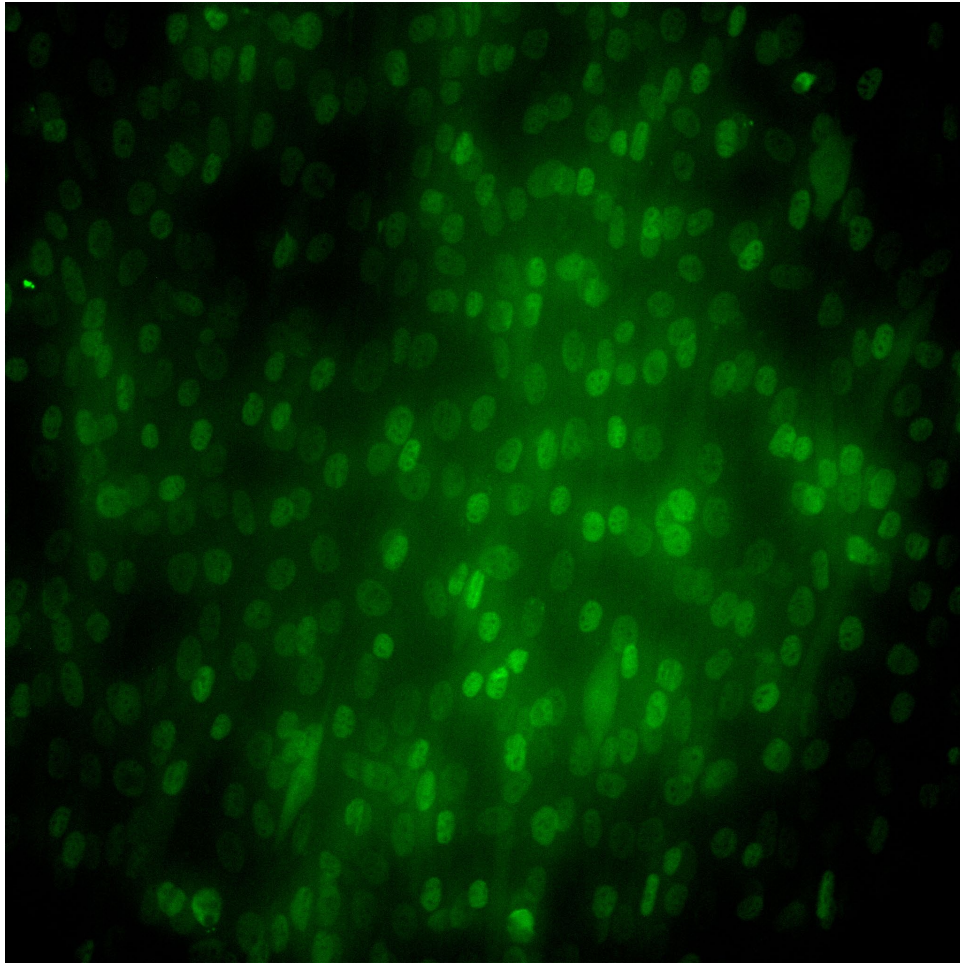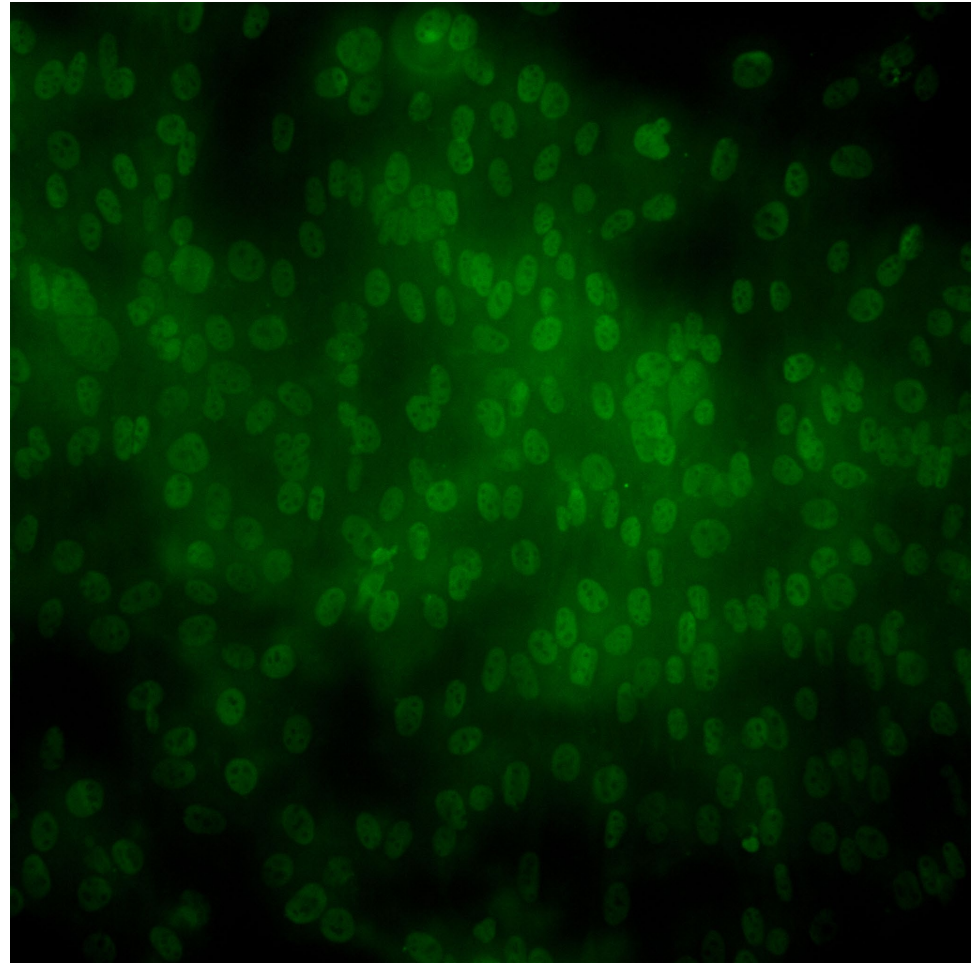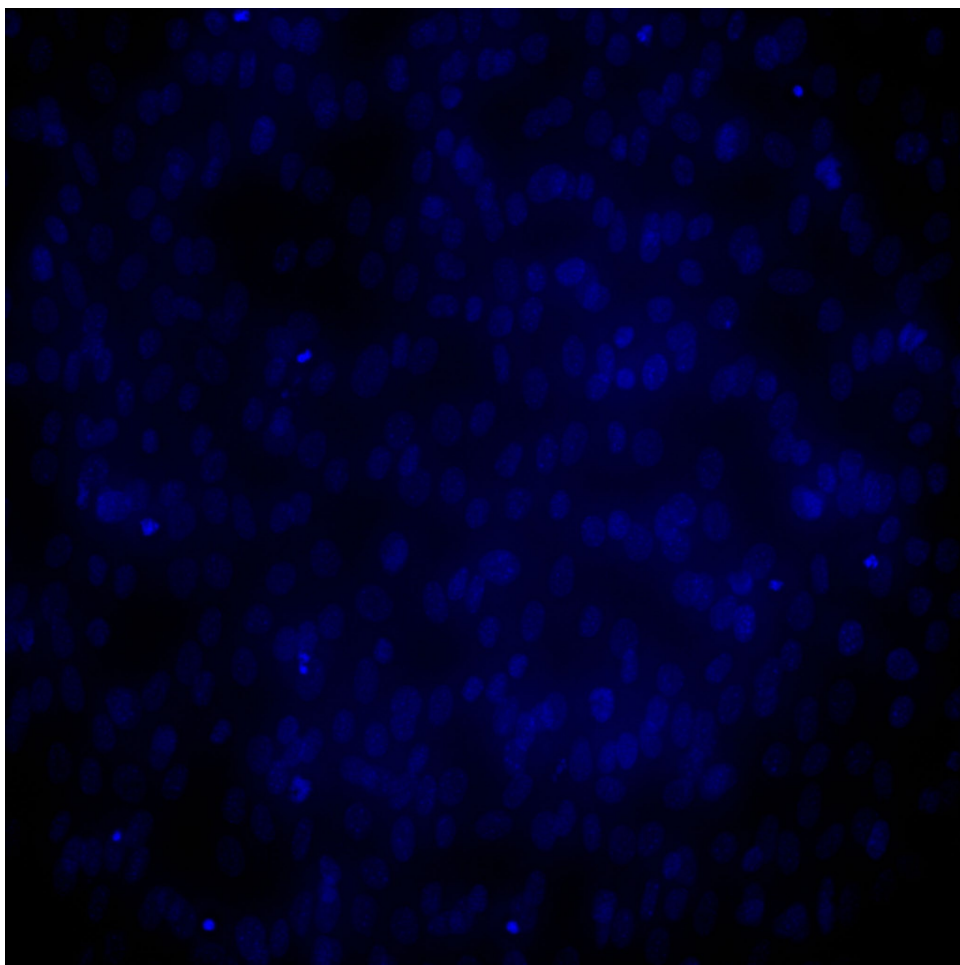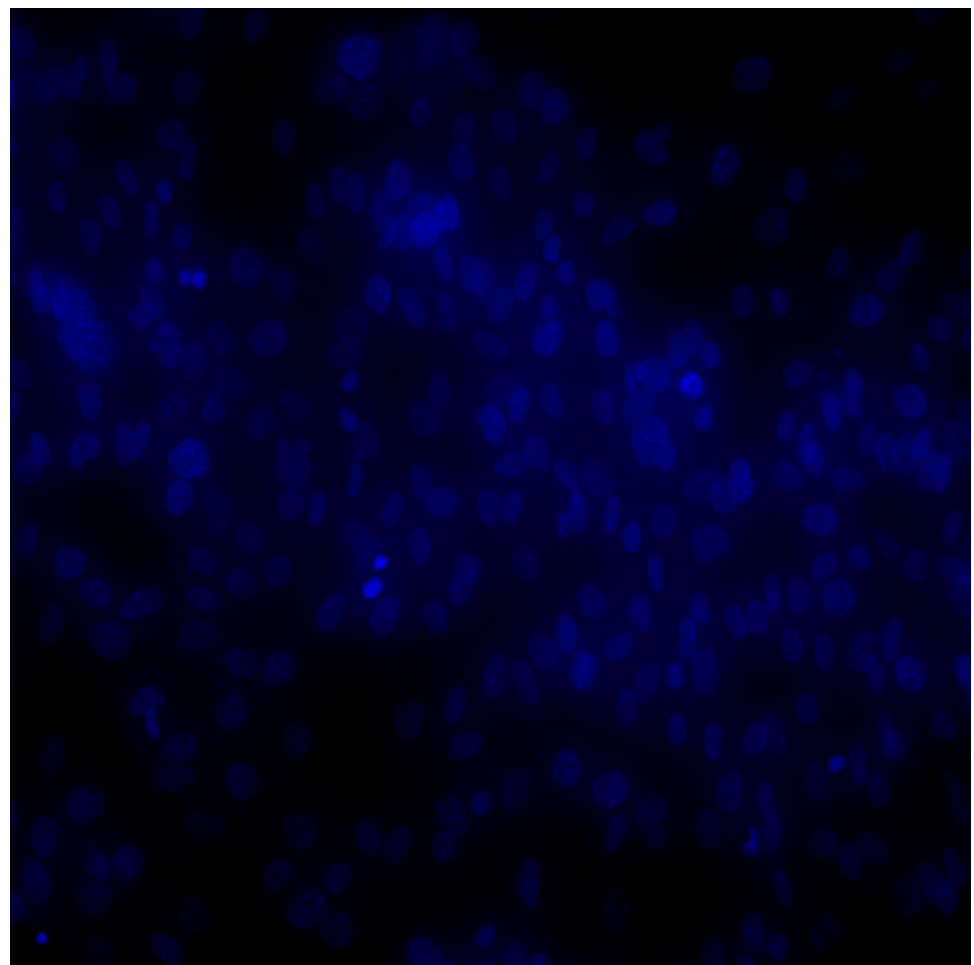



# Day 4 MyoD

WT

2A4

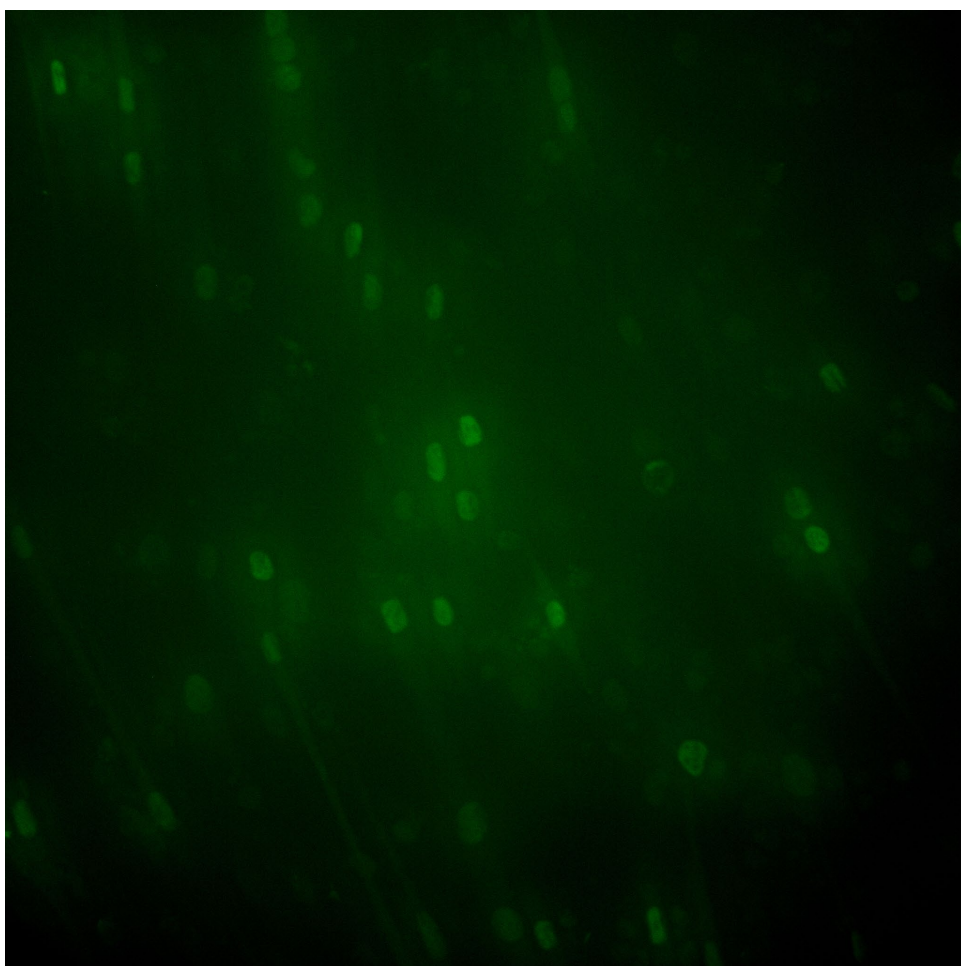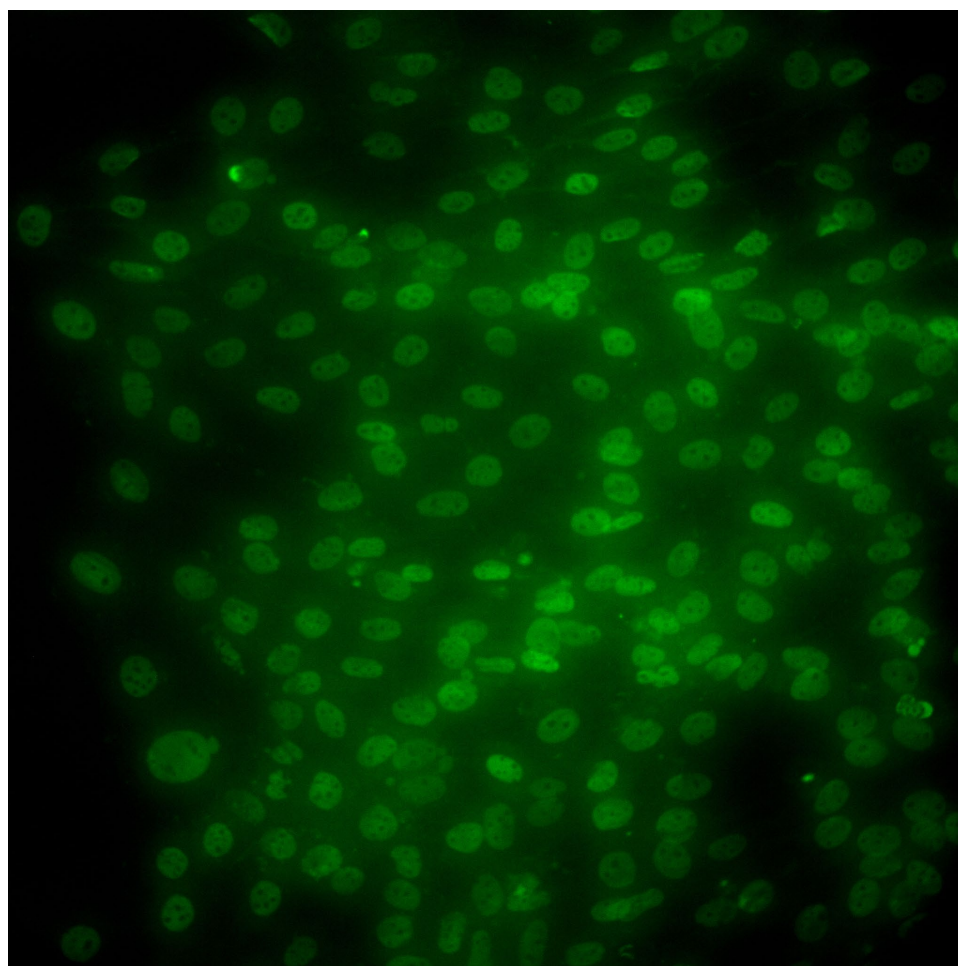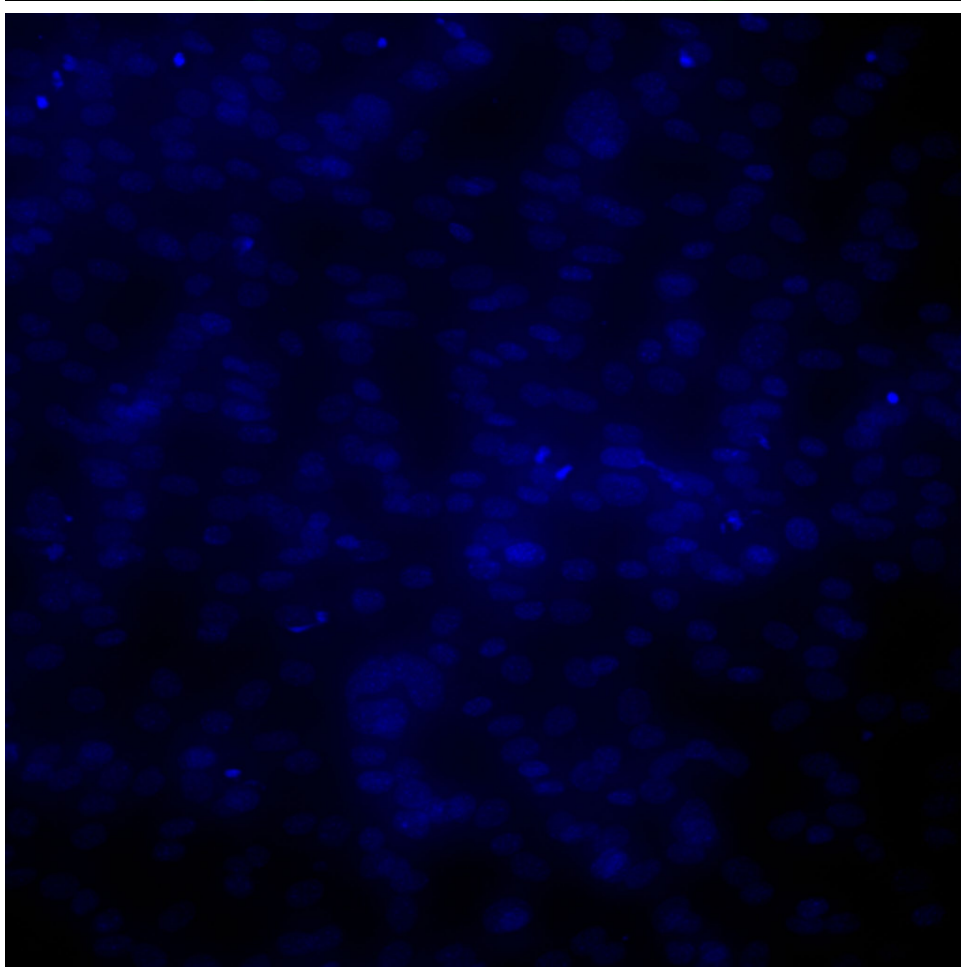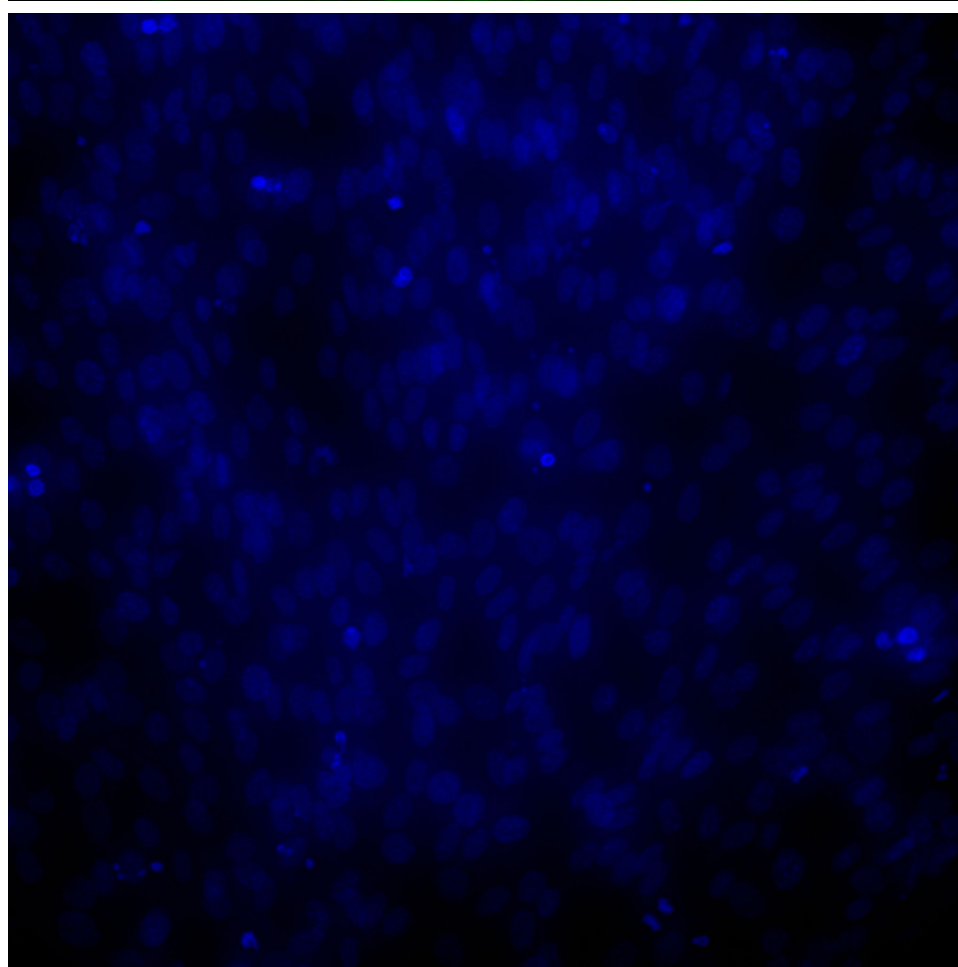



# Day 0 Myogenin

WT

2A4

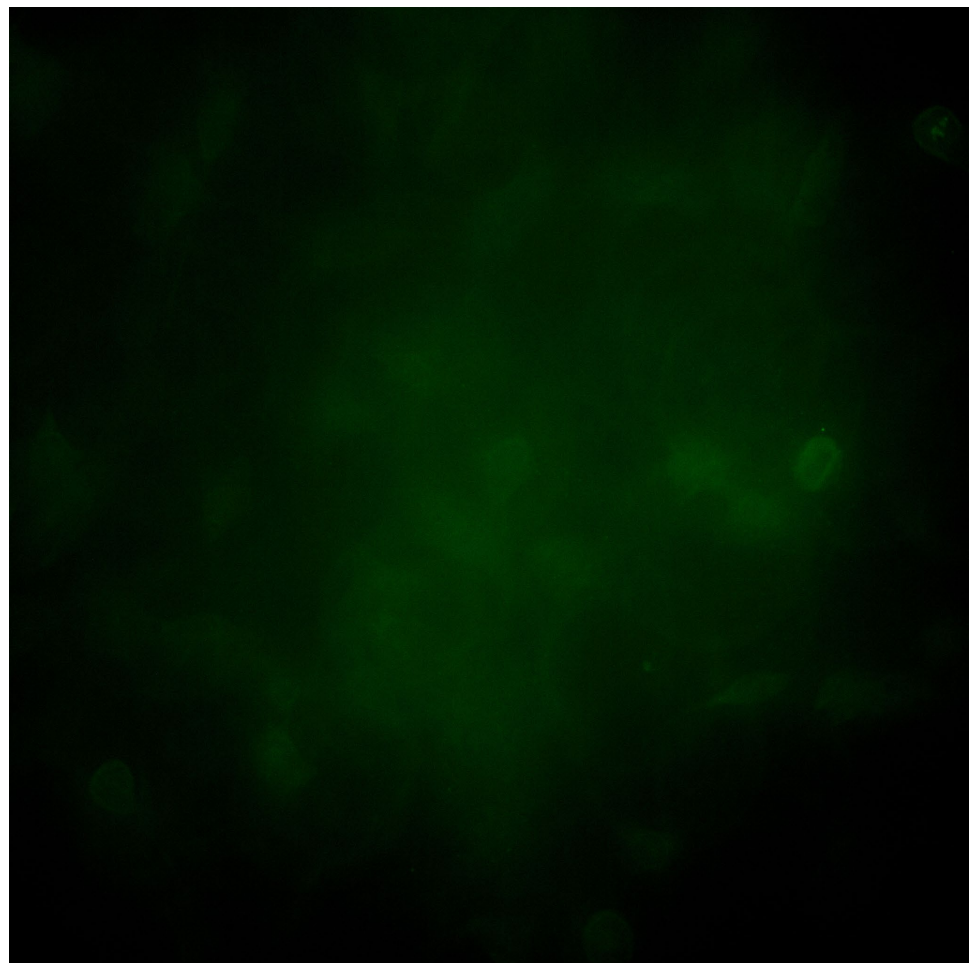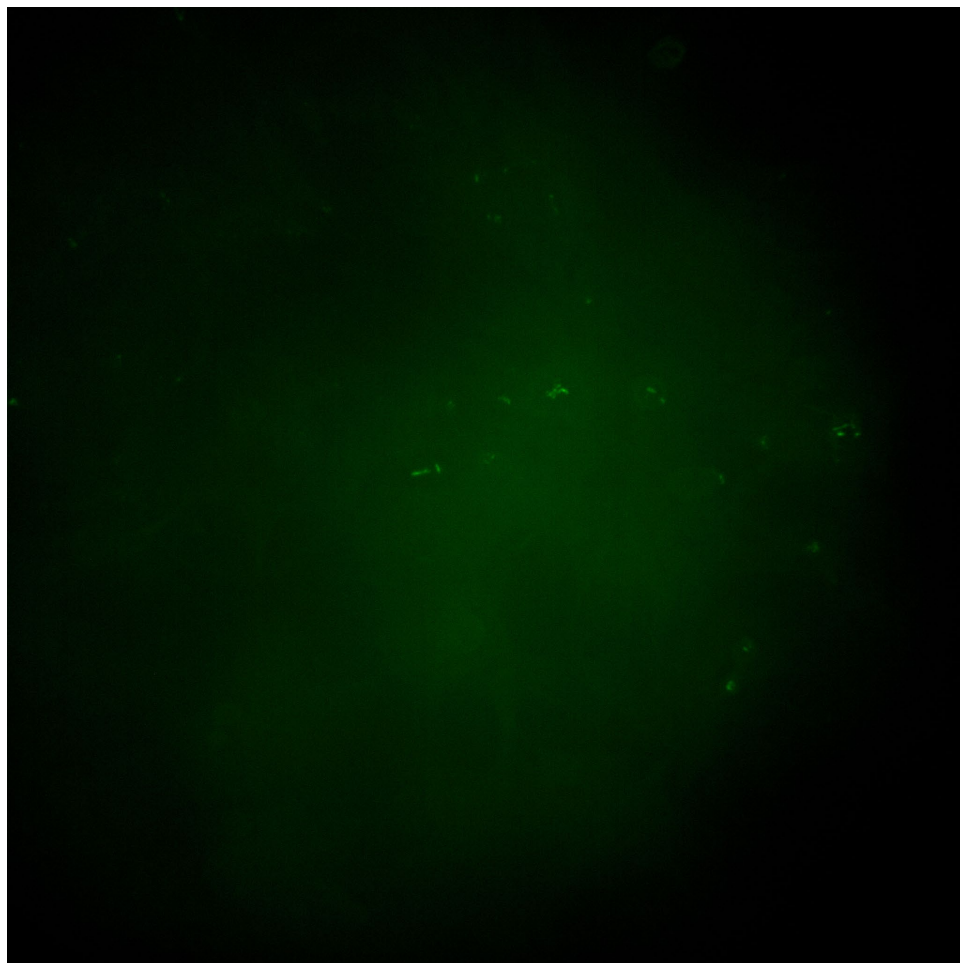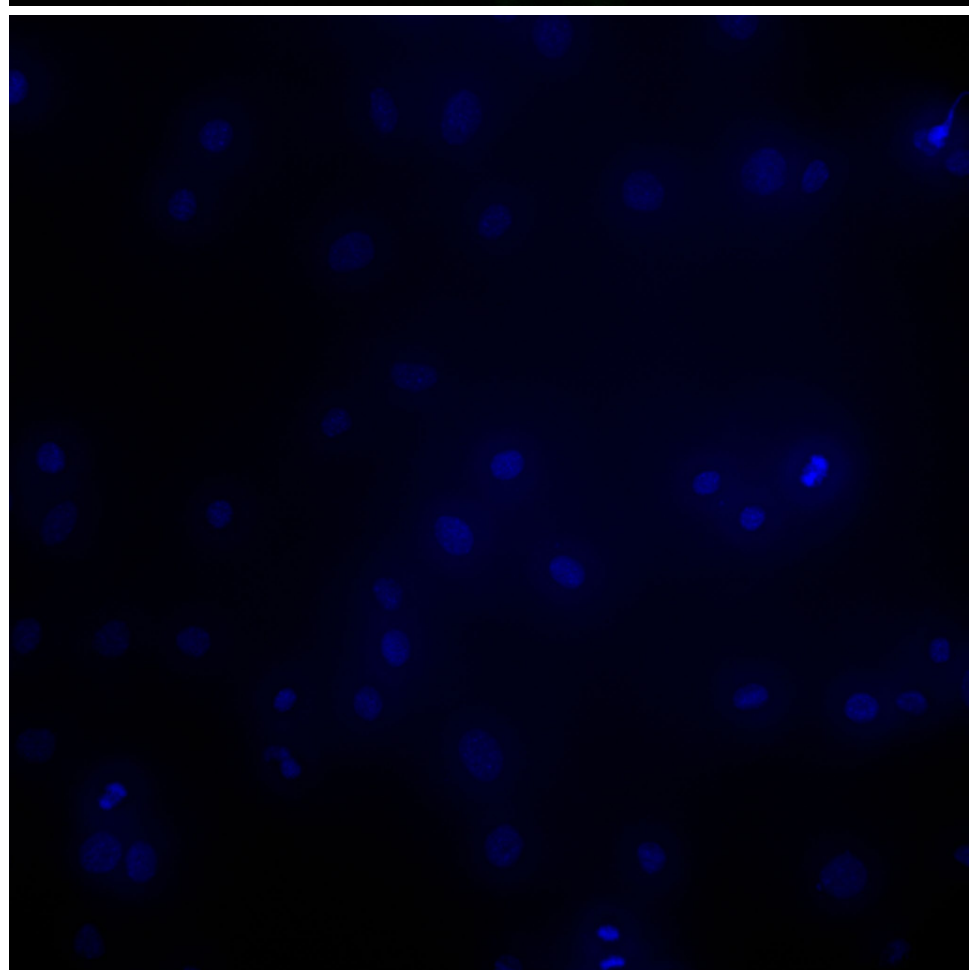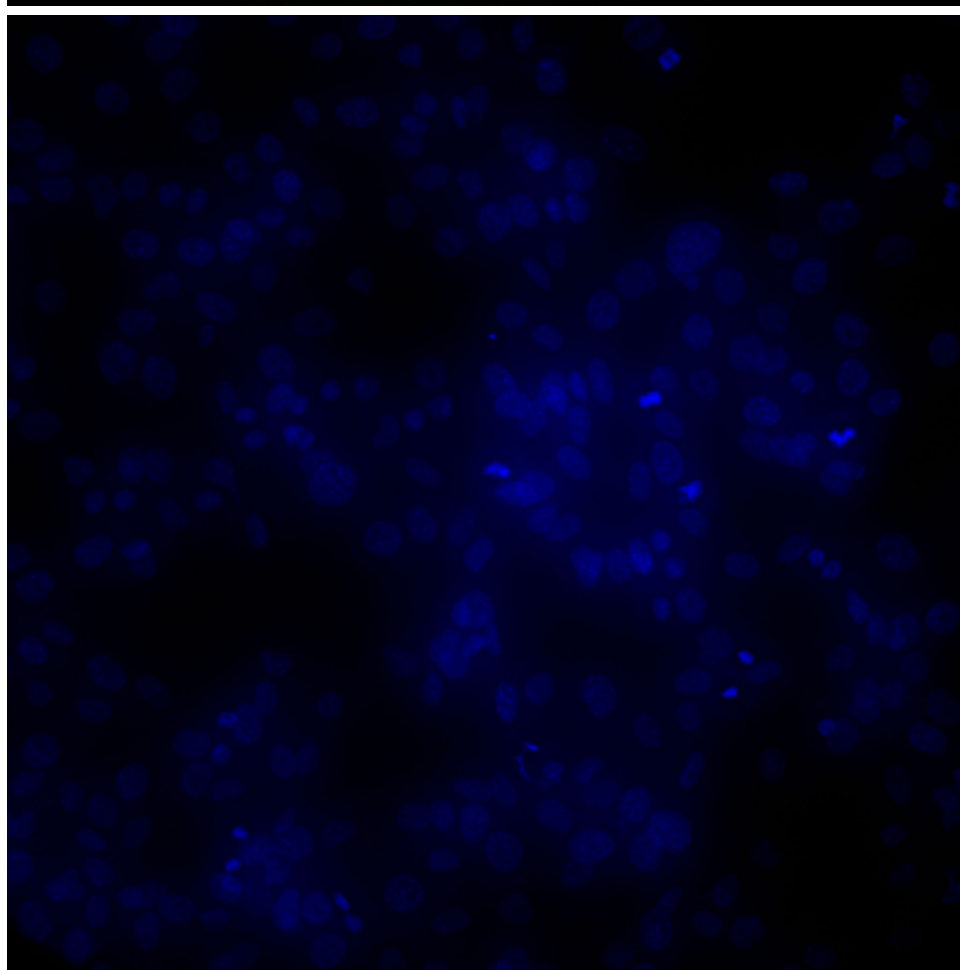



# Day 1 Myogenin

WT

2A4

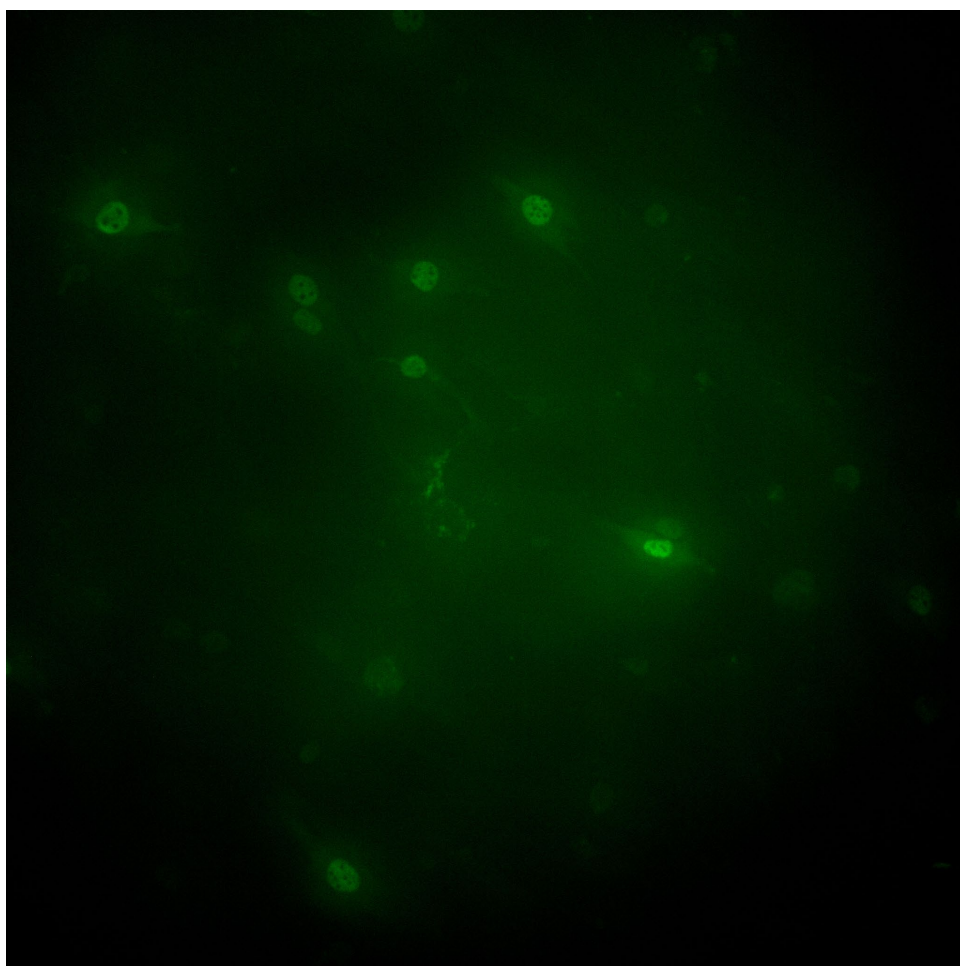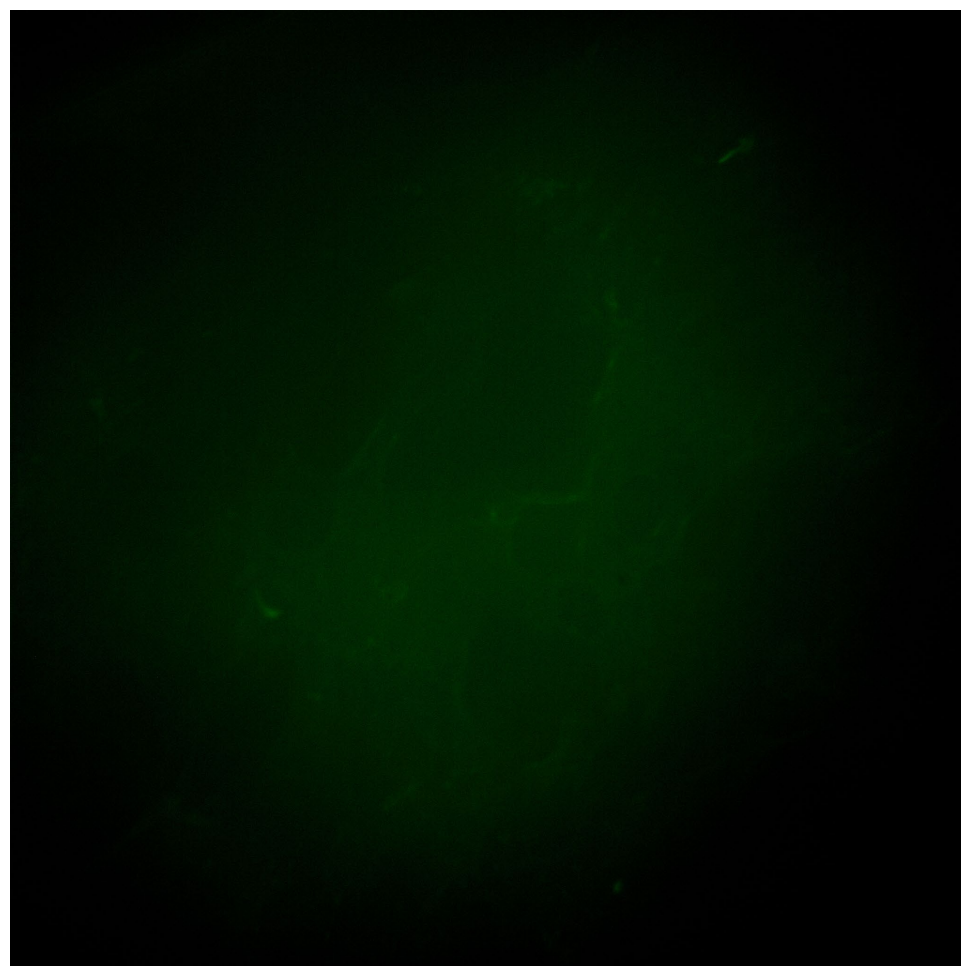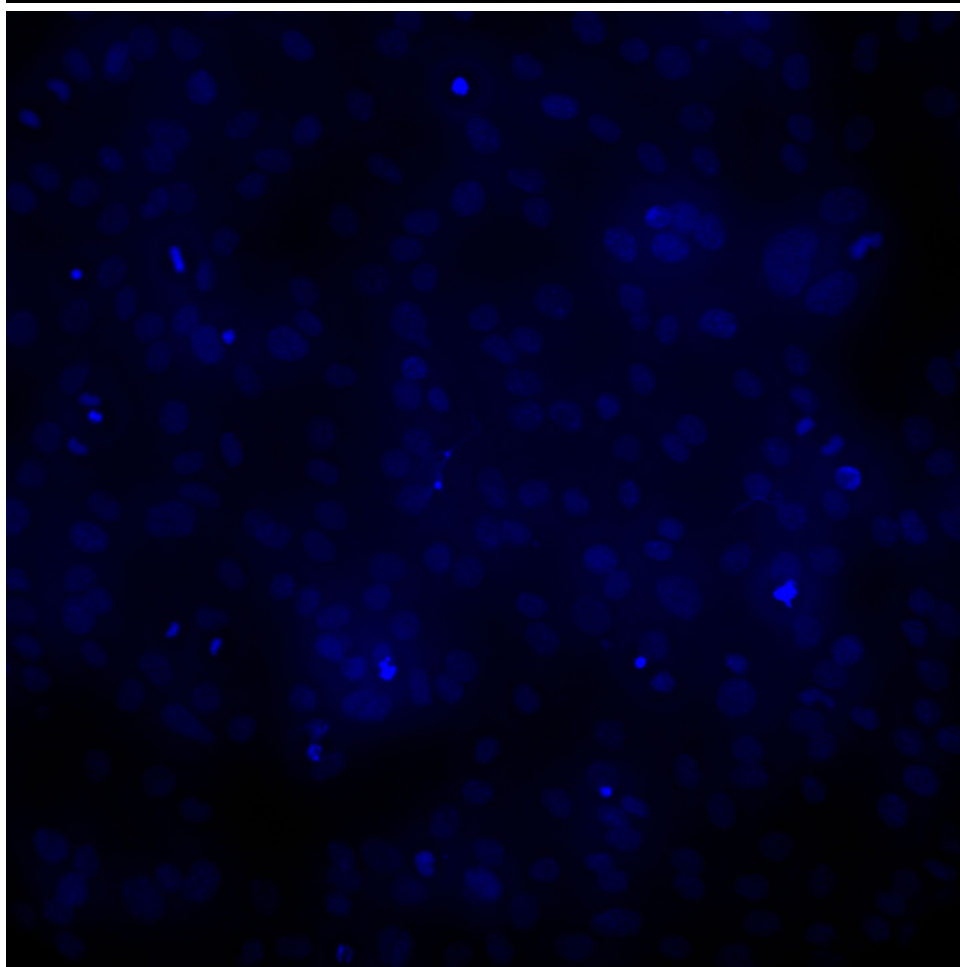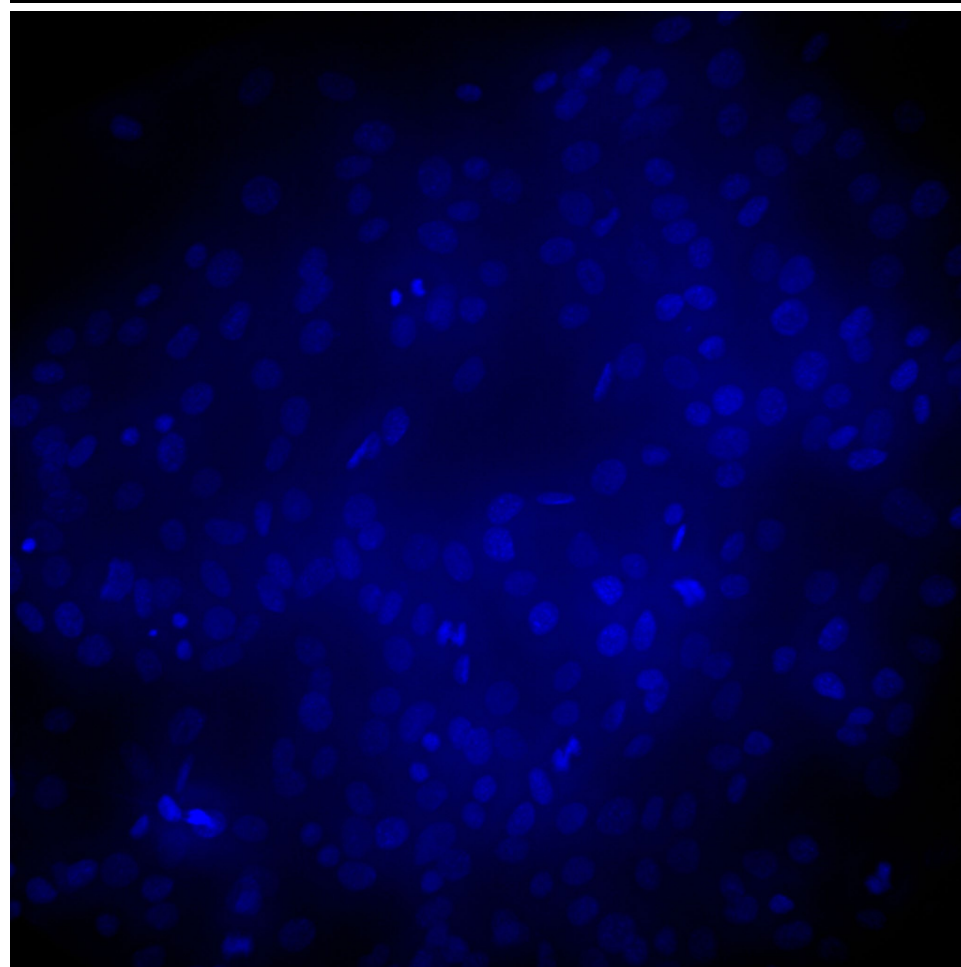



# Day 2 Myogenin

WT

2A4

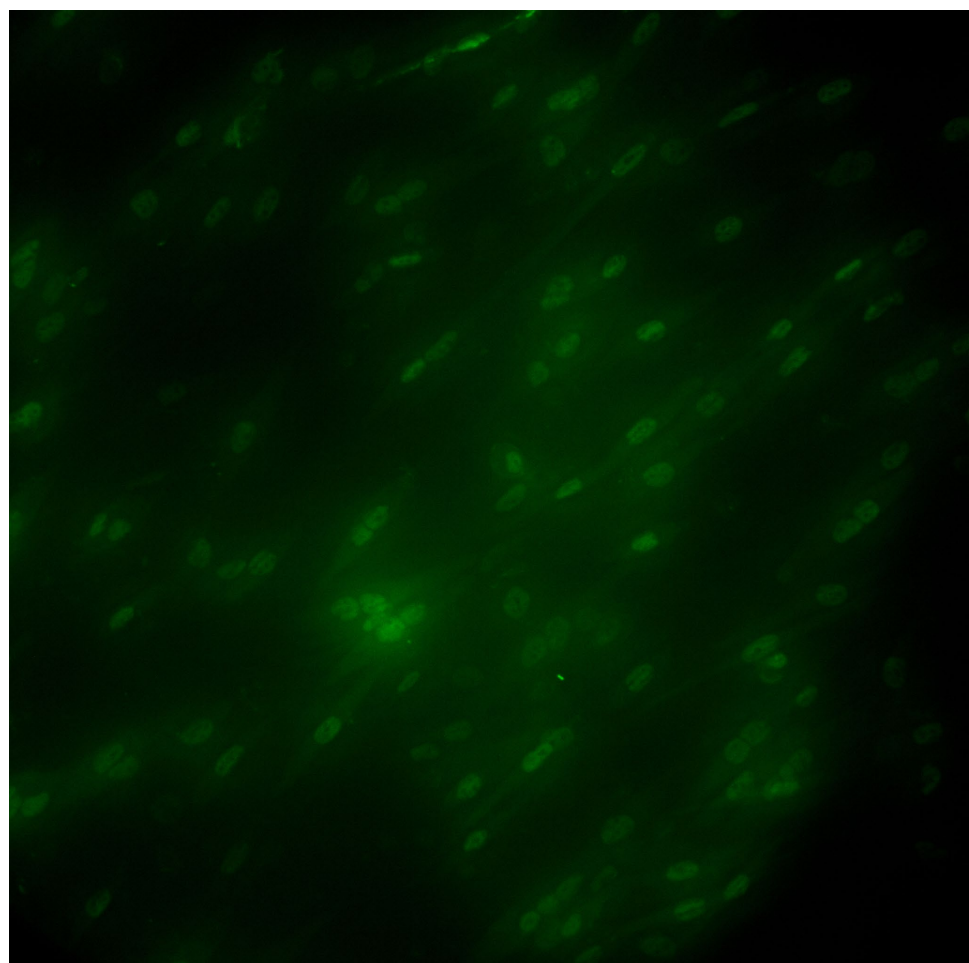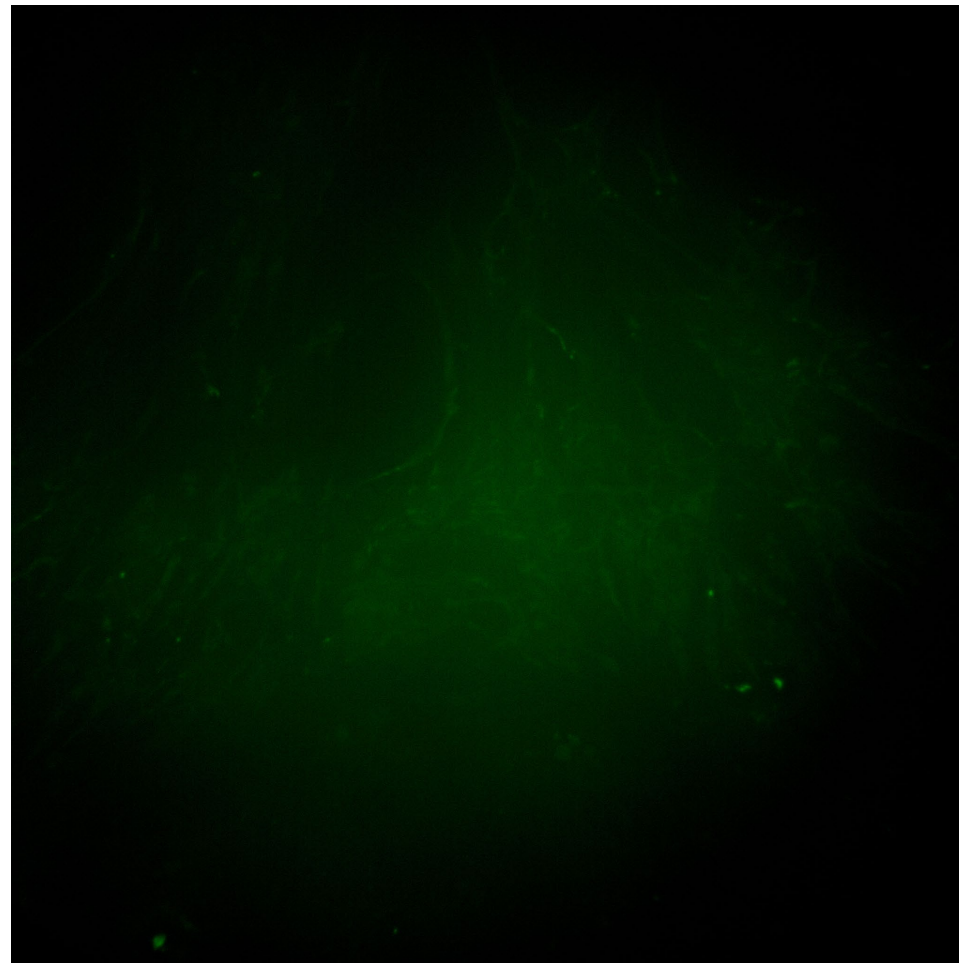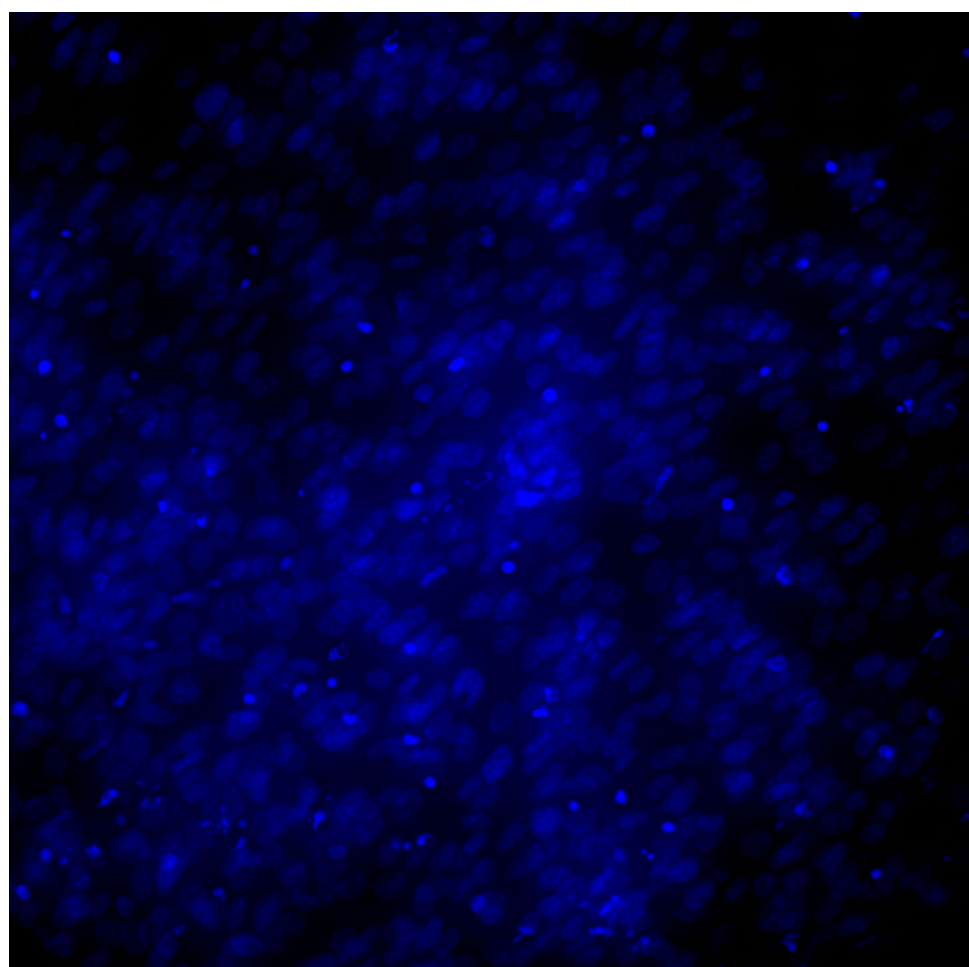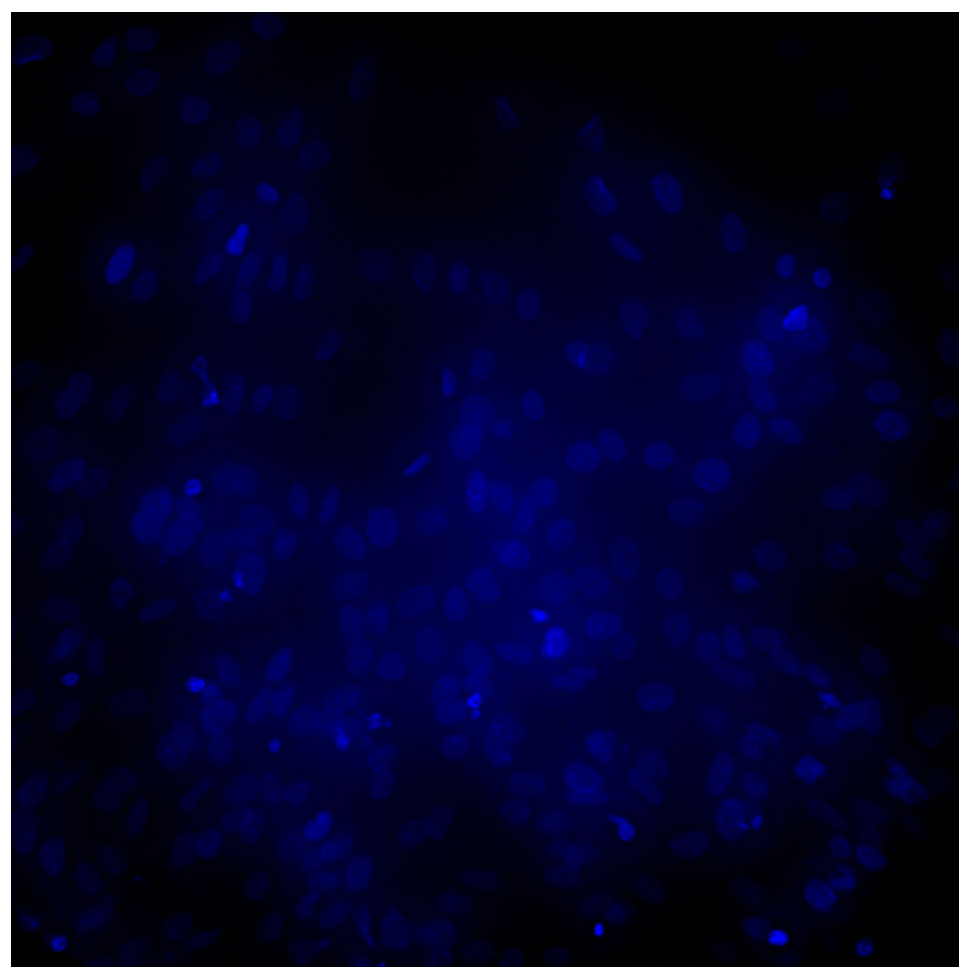



# Day 3 Myogenin

WT

2A4

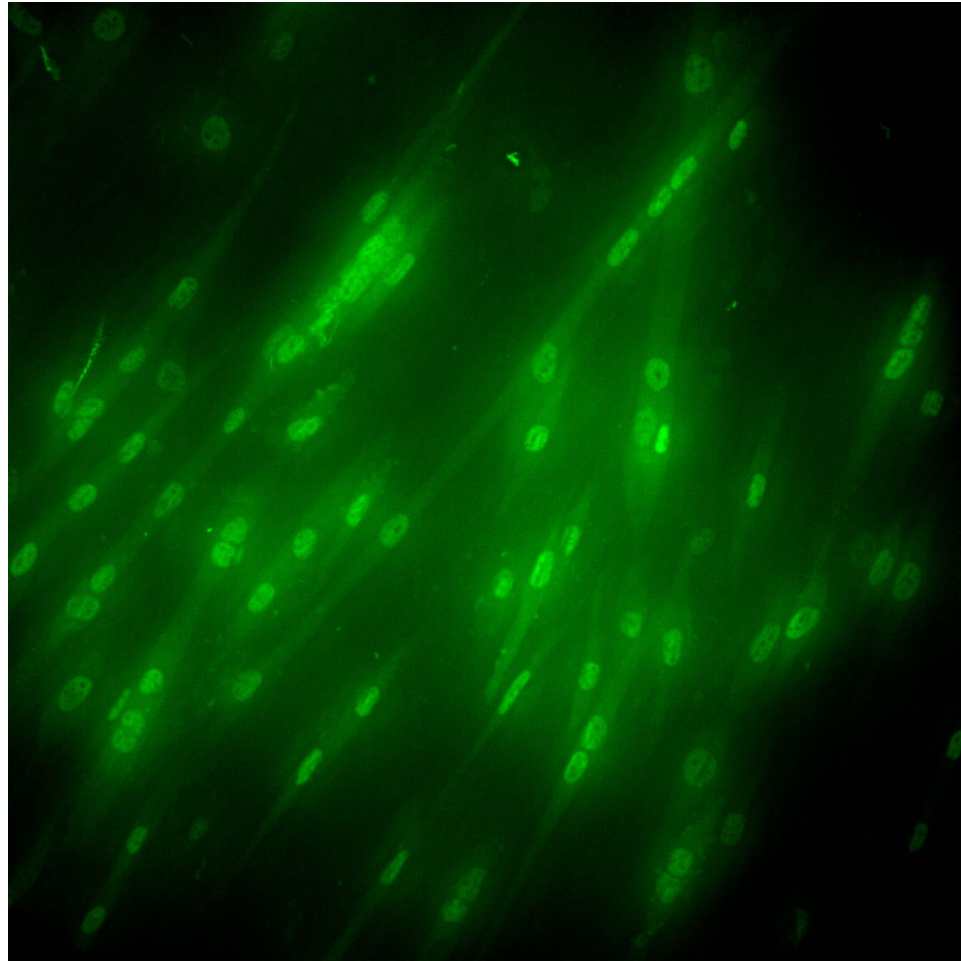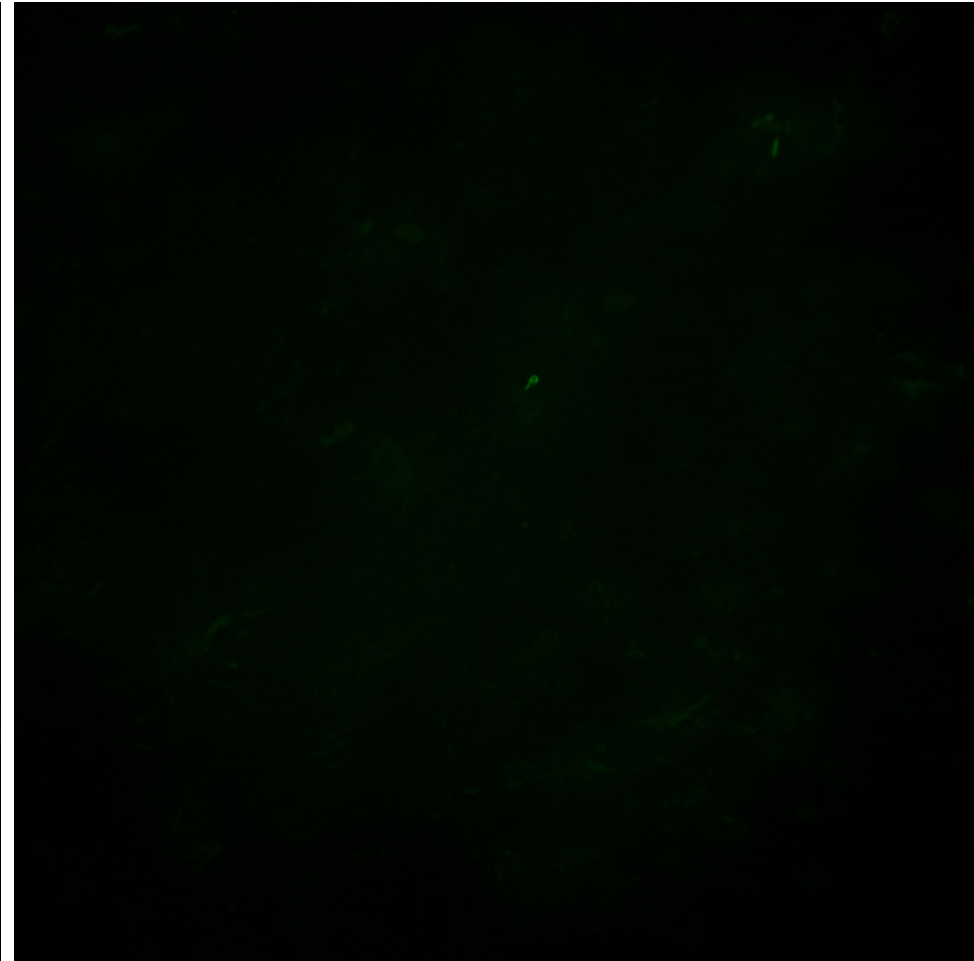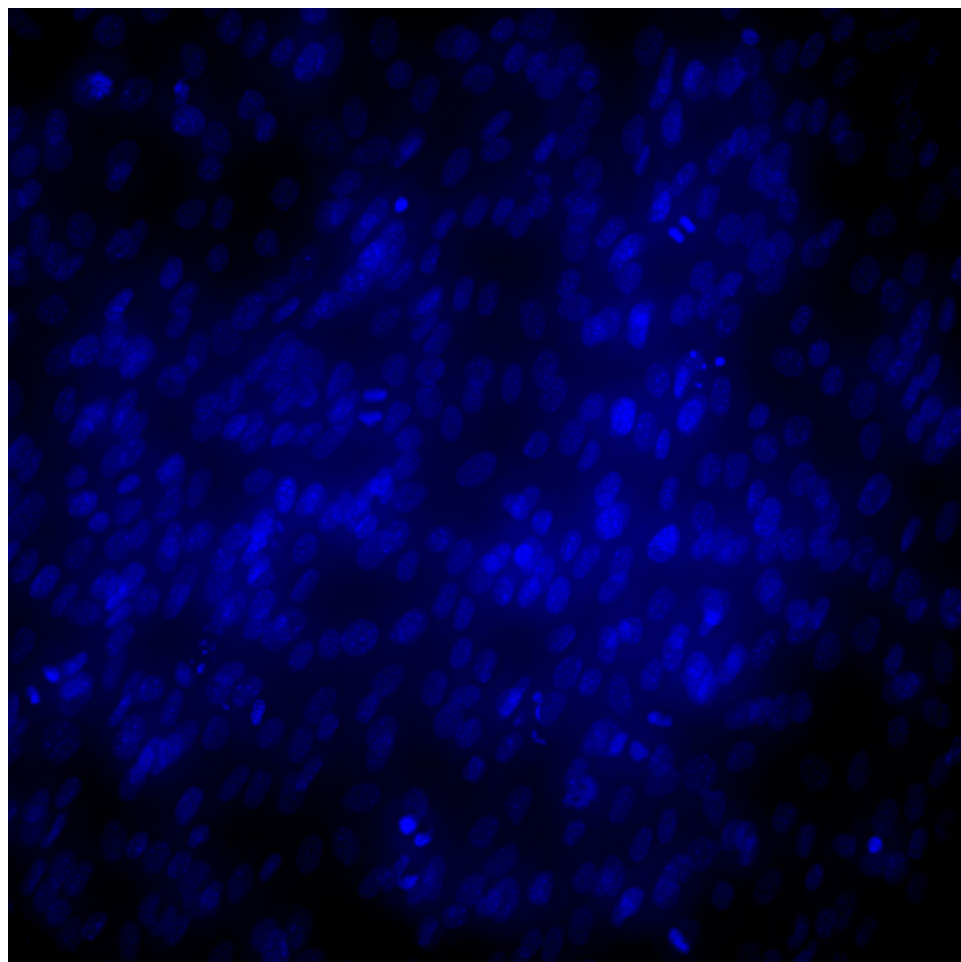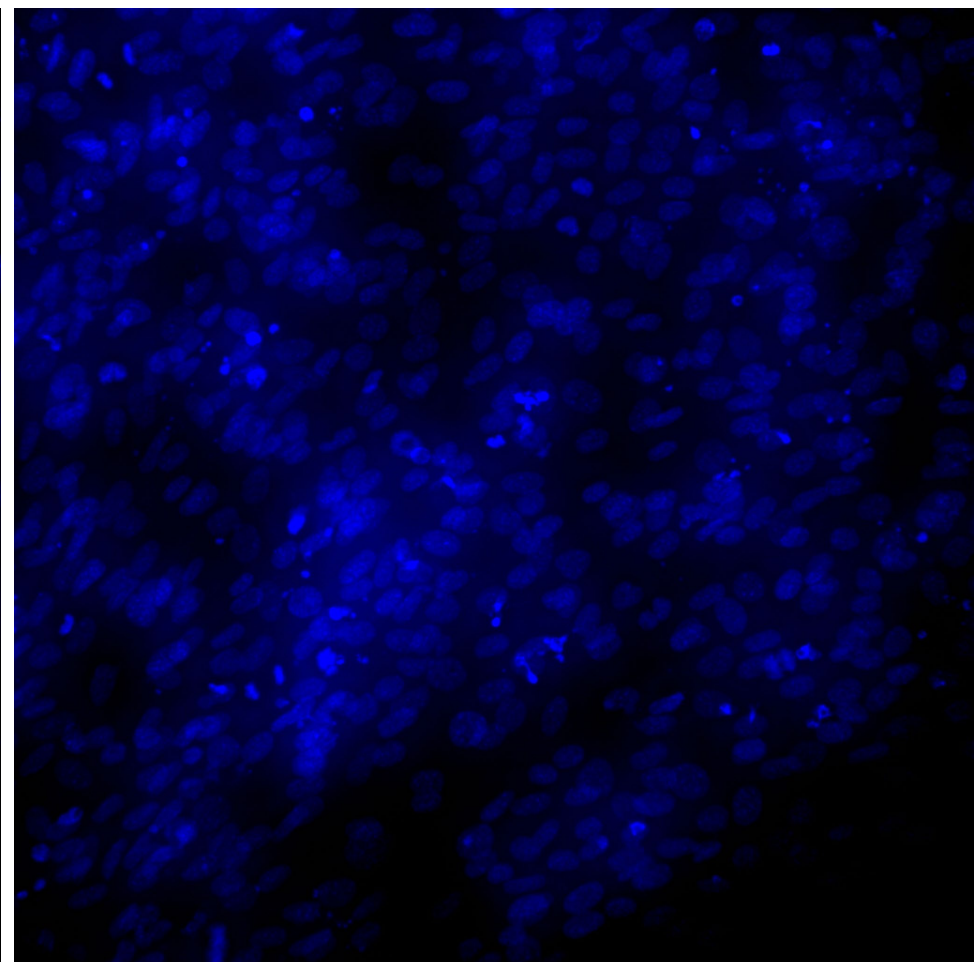



# Day 4 myogenin

WT

2A4

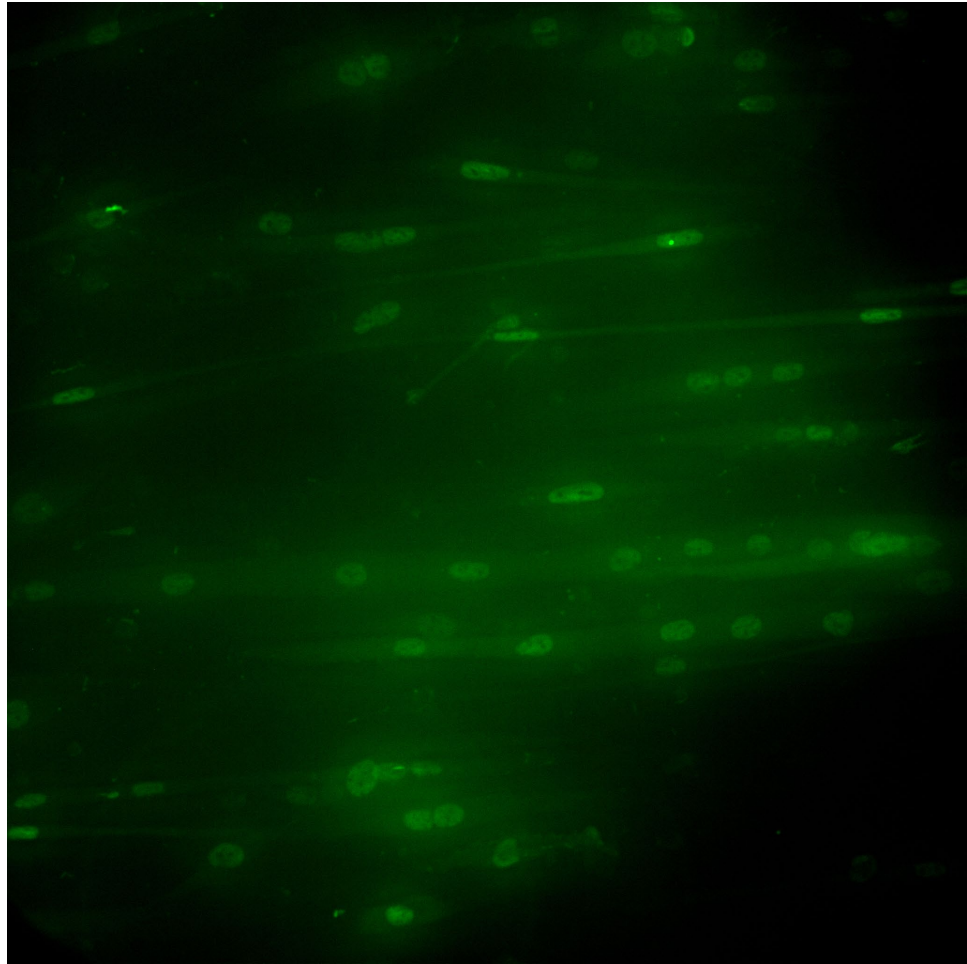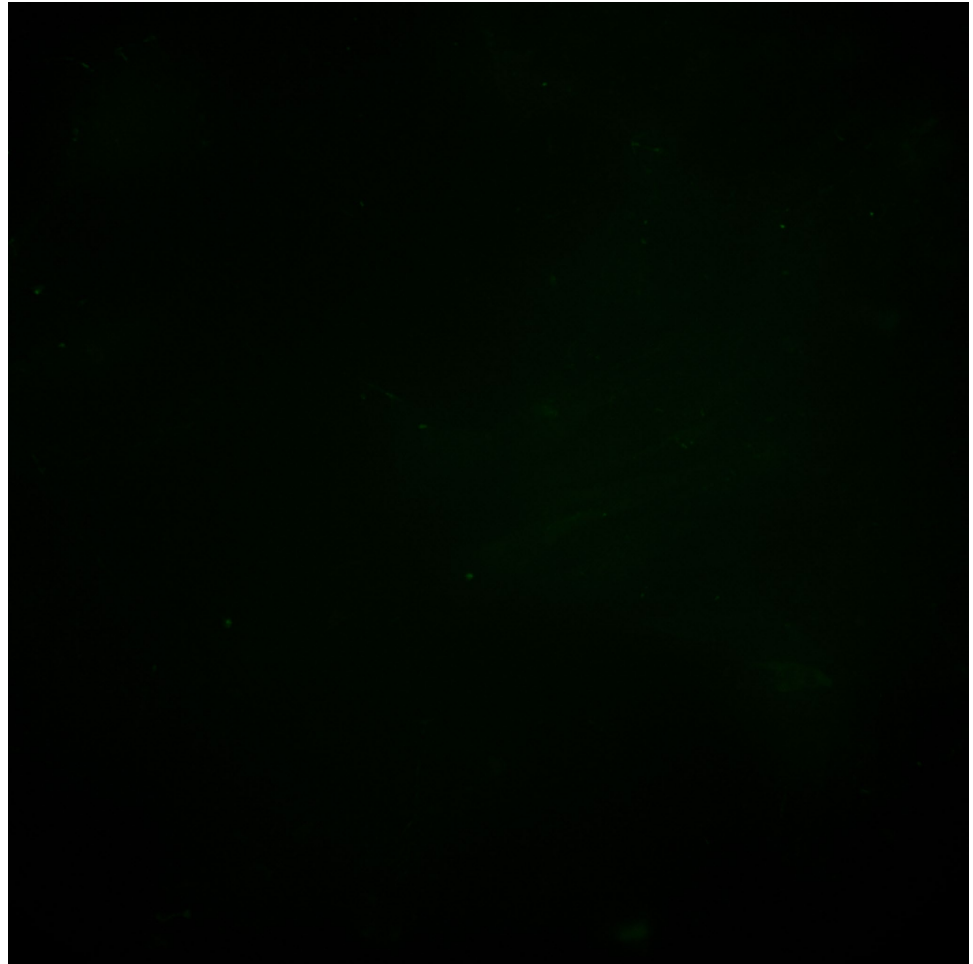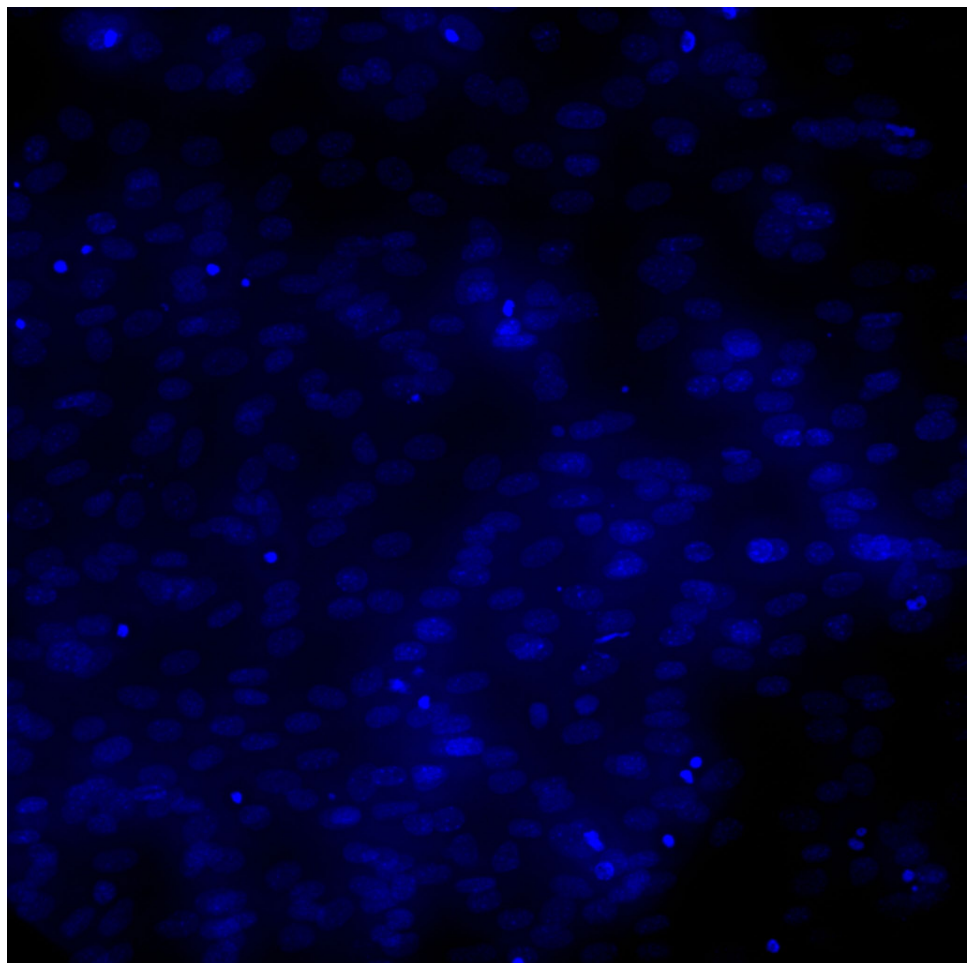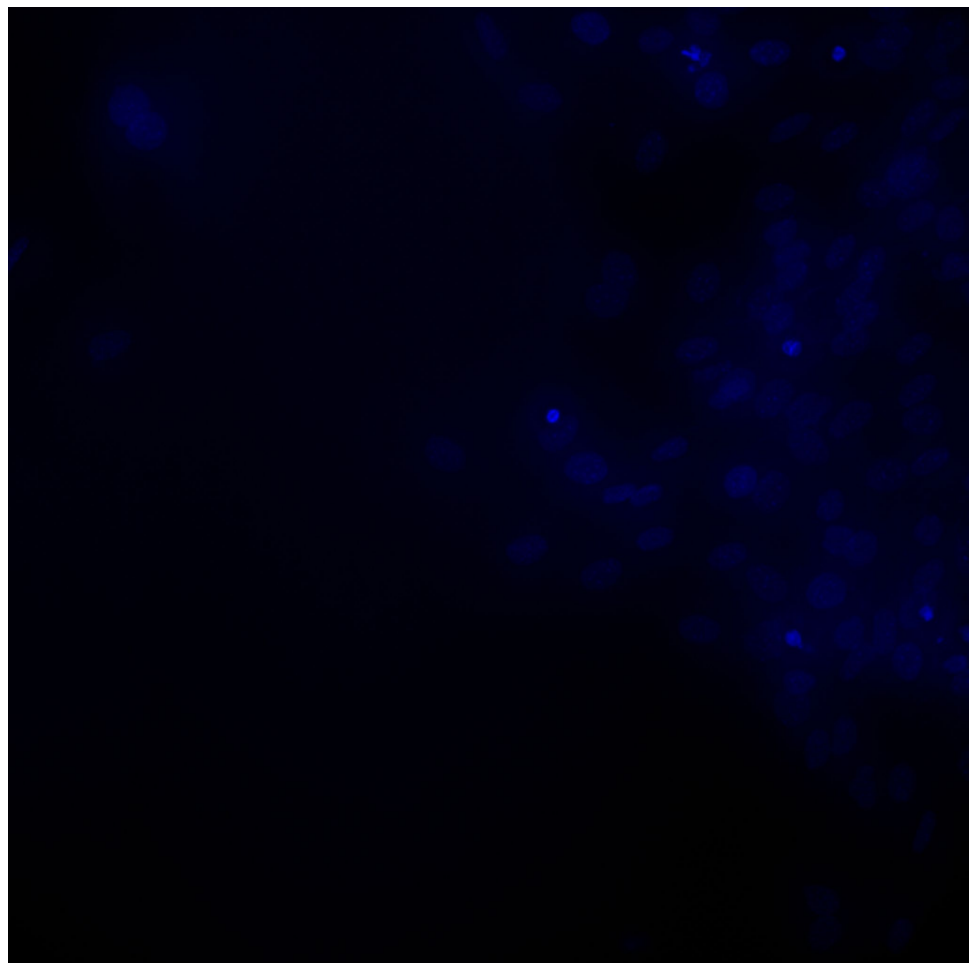



# Day 0 MHC

WT

2A4

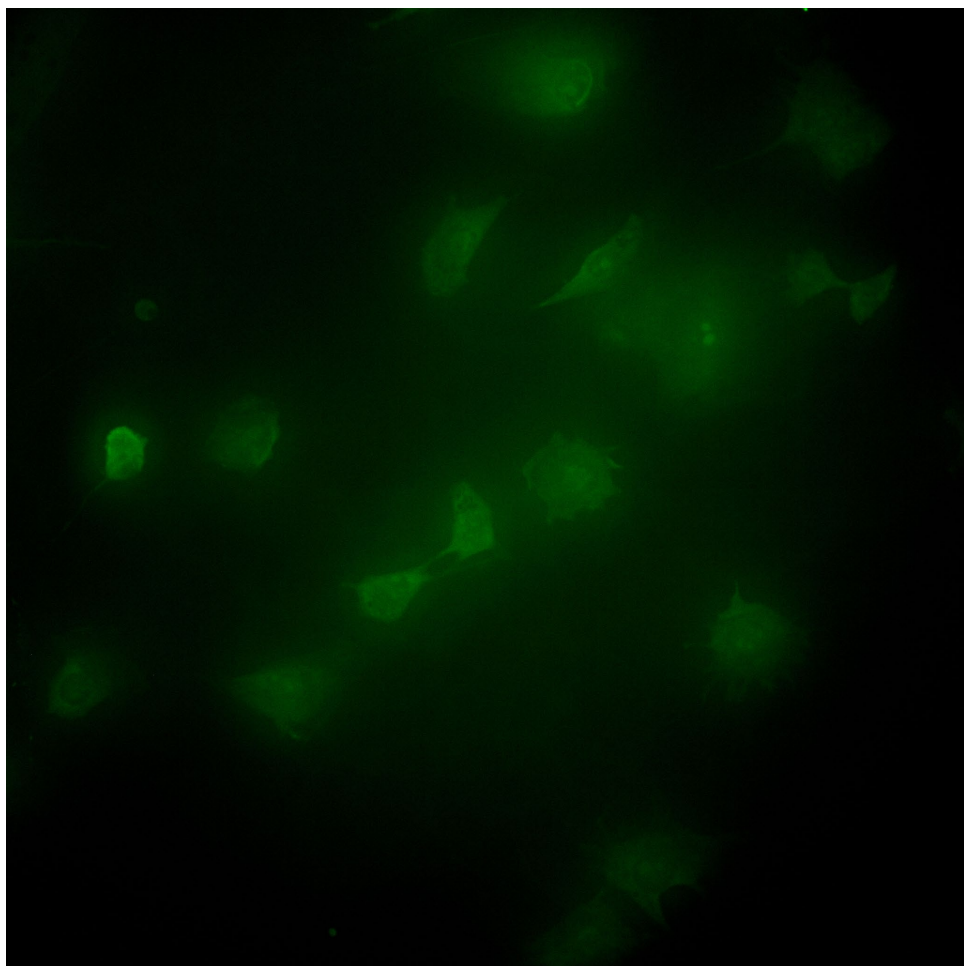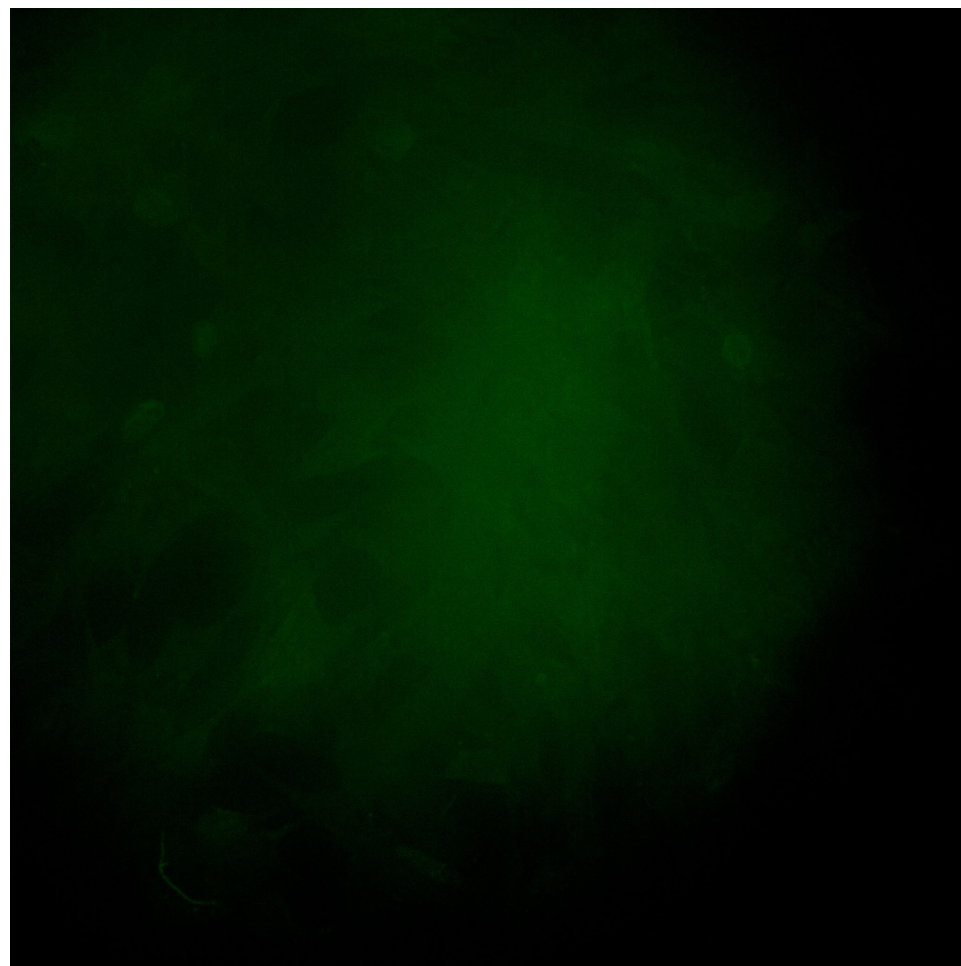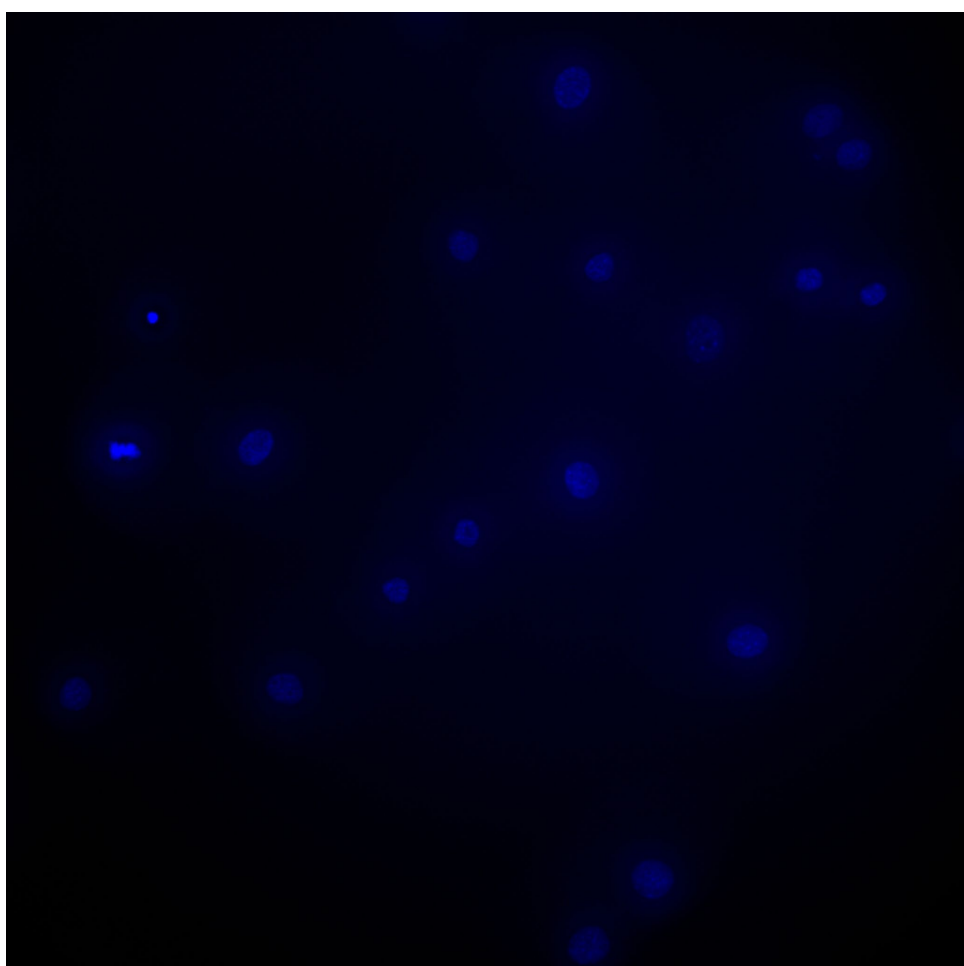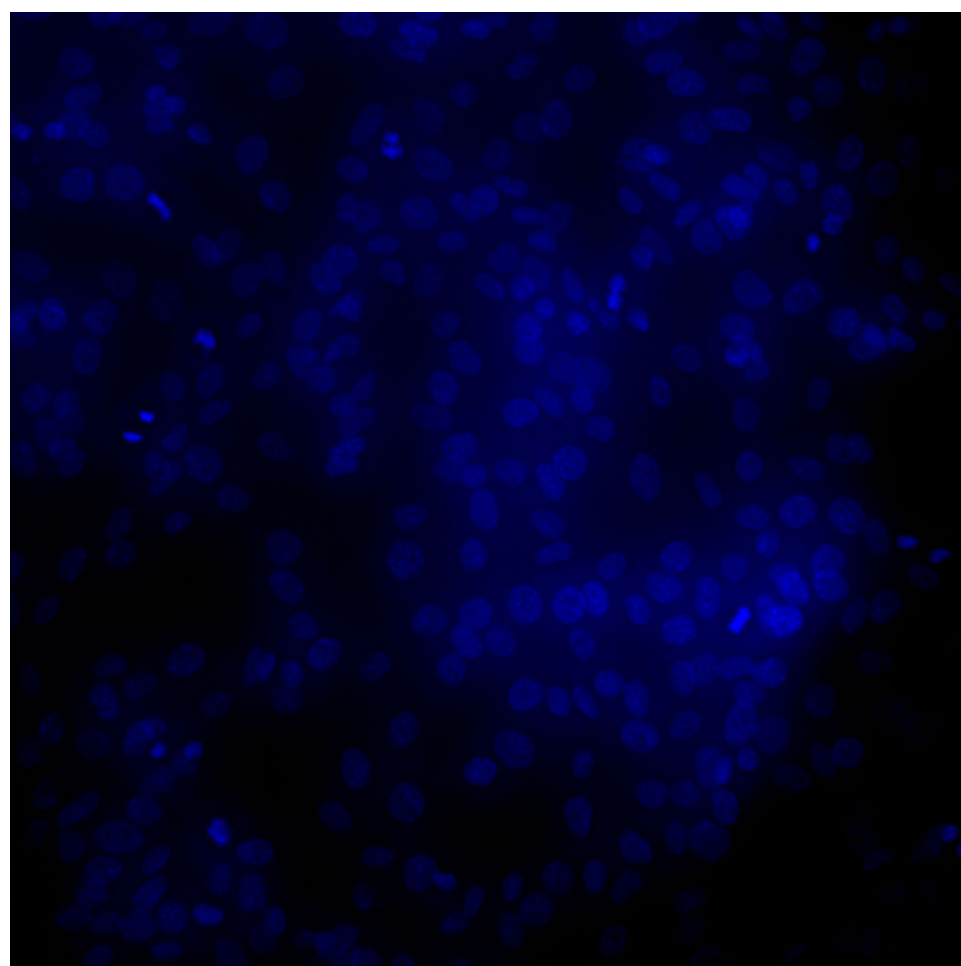



# Day 1 MHC

WT

2A4

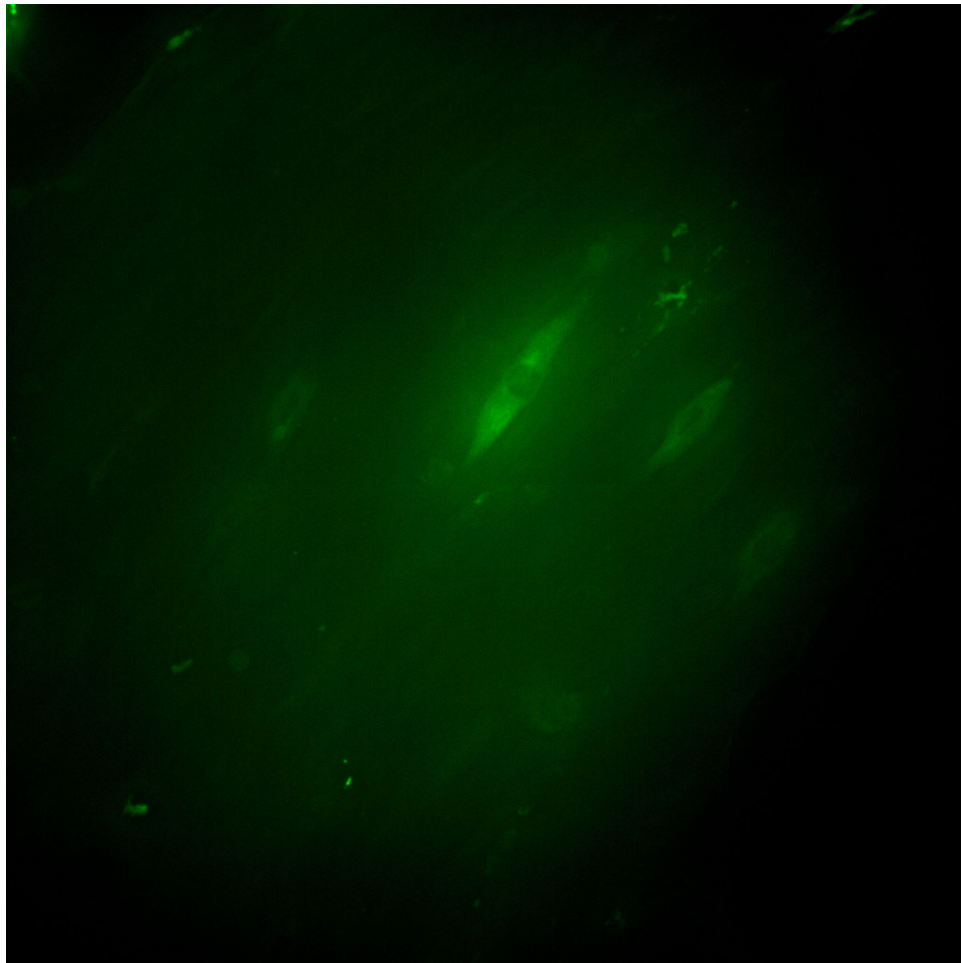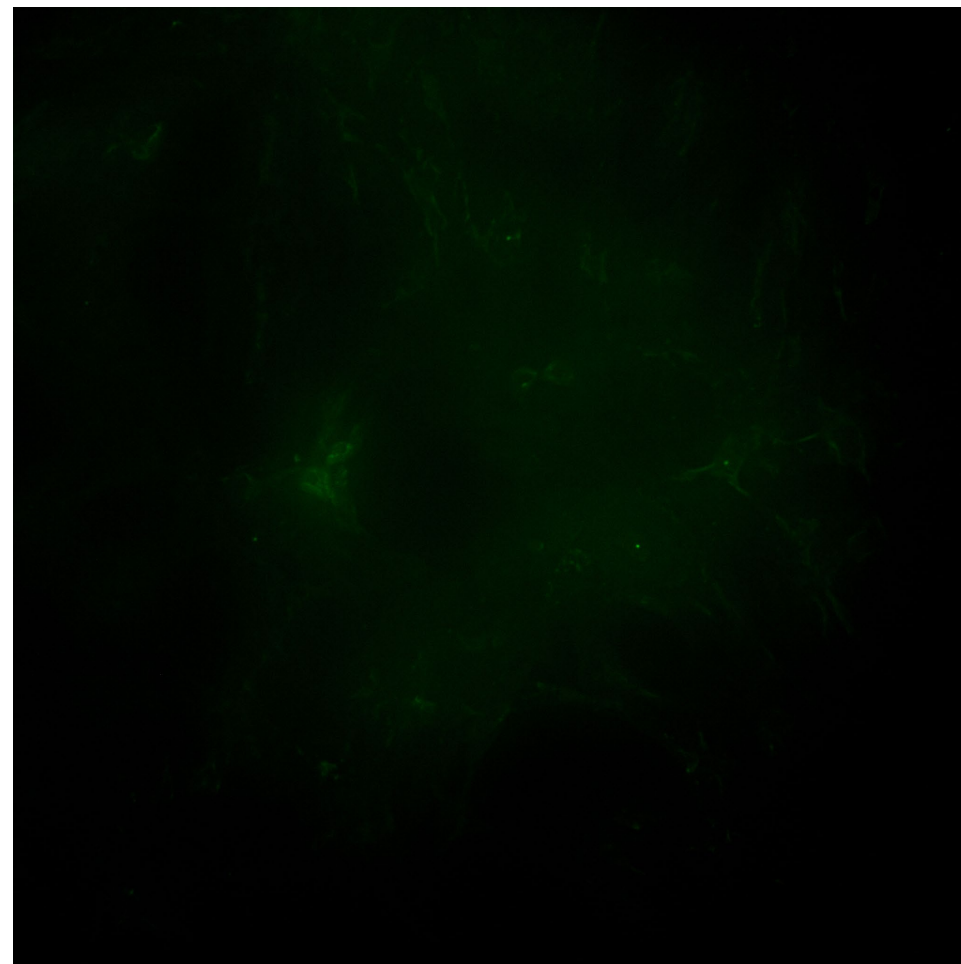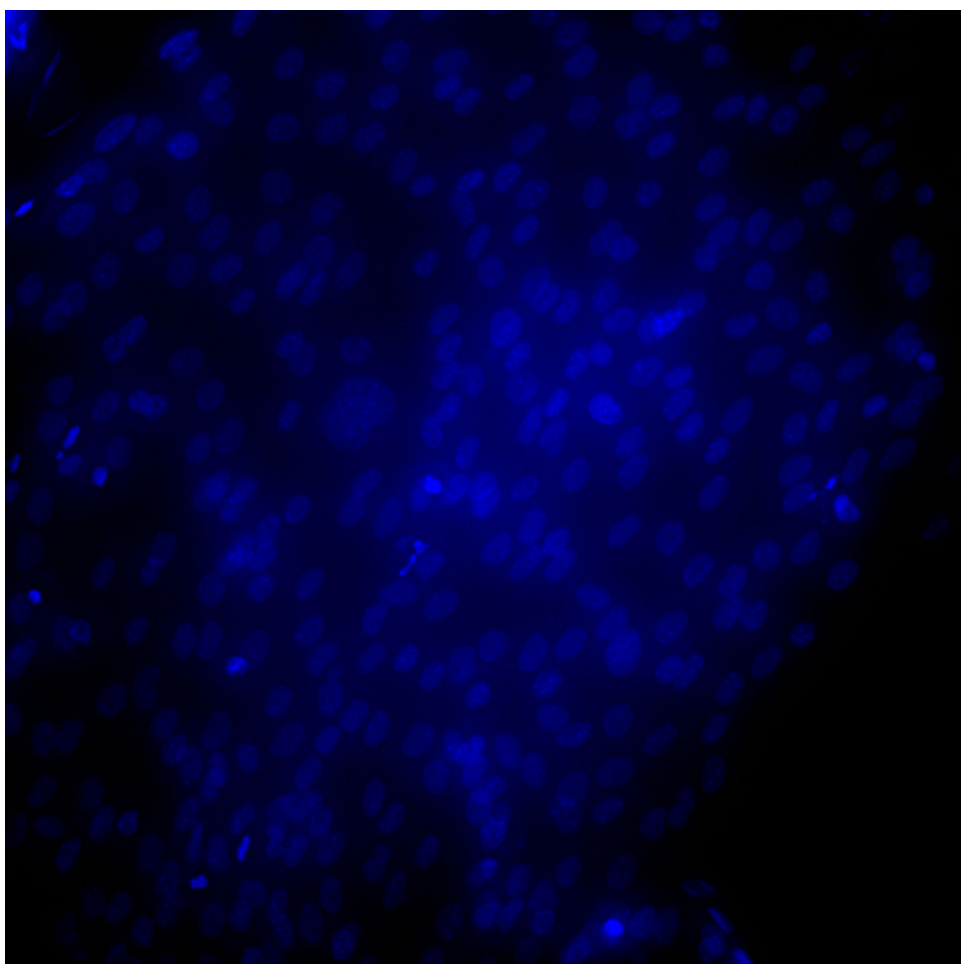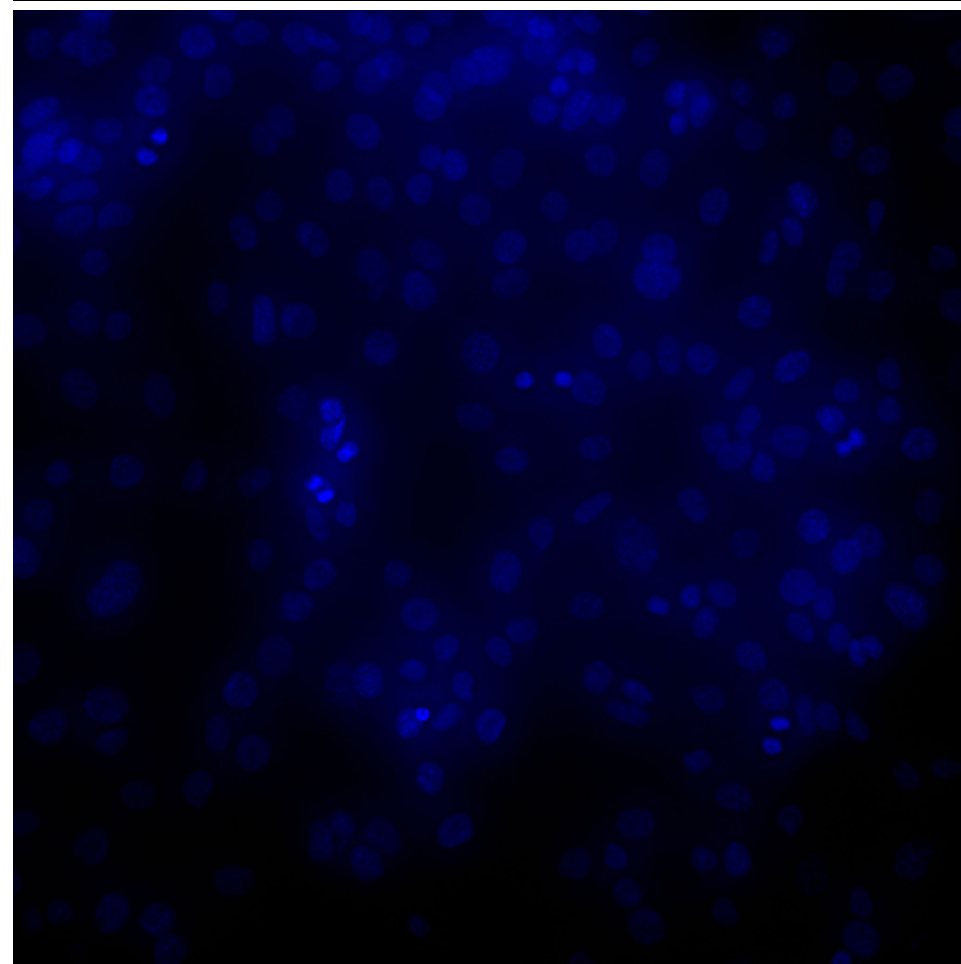



# Day 2 MHC

WT

2A4

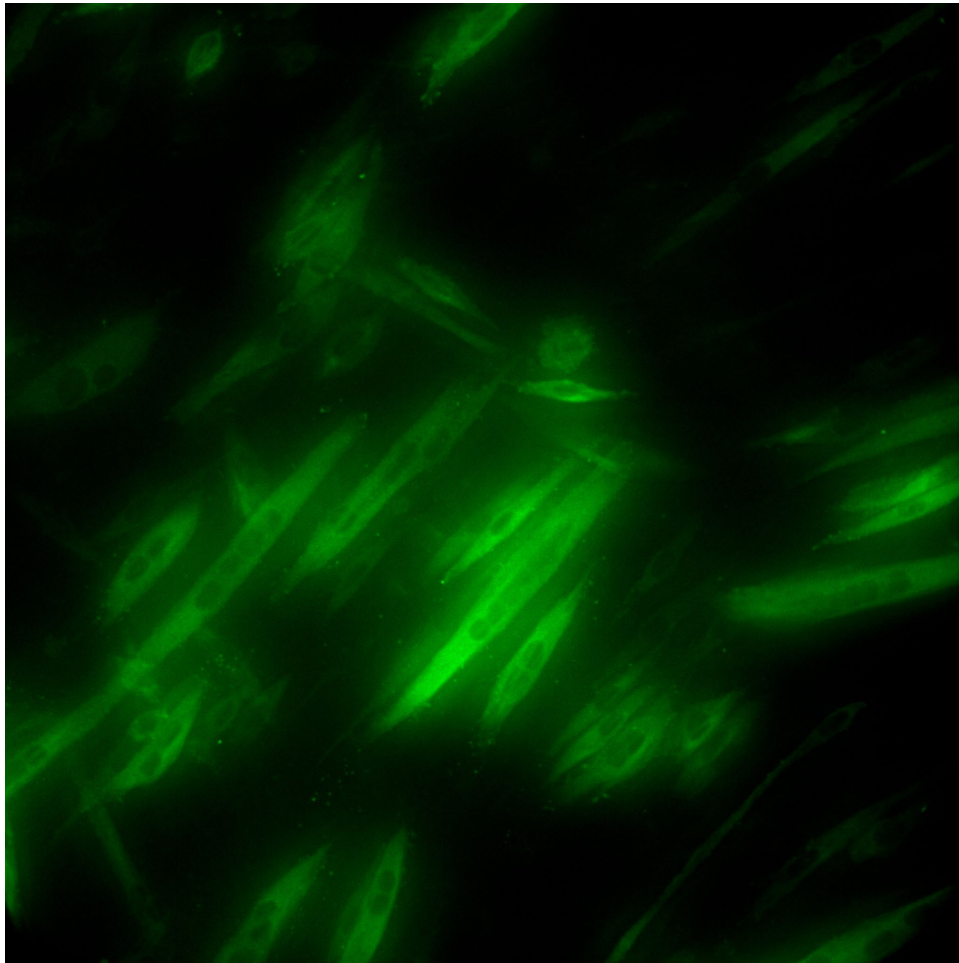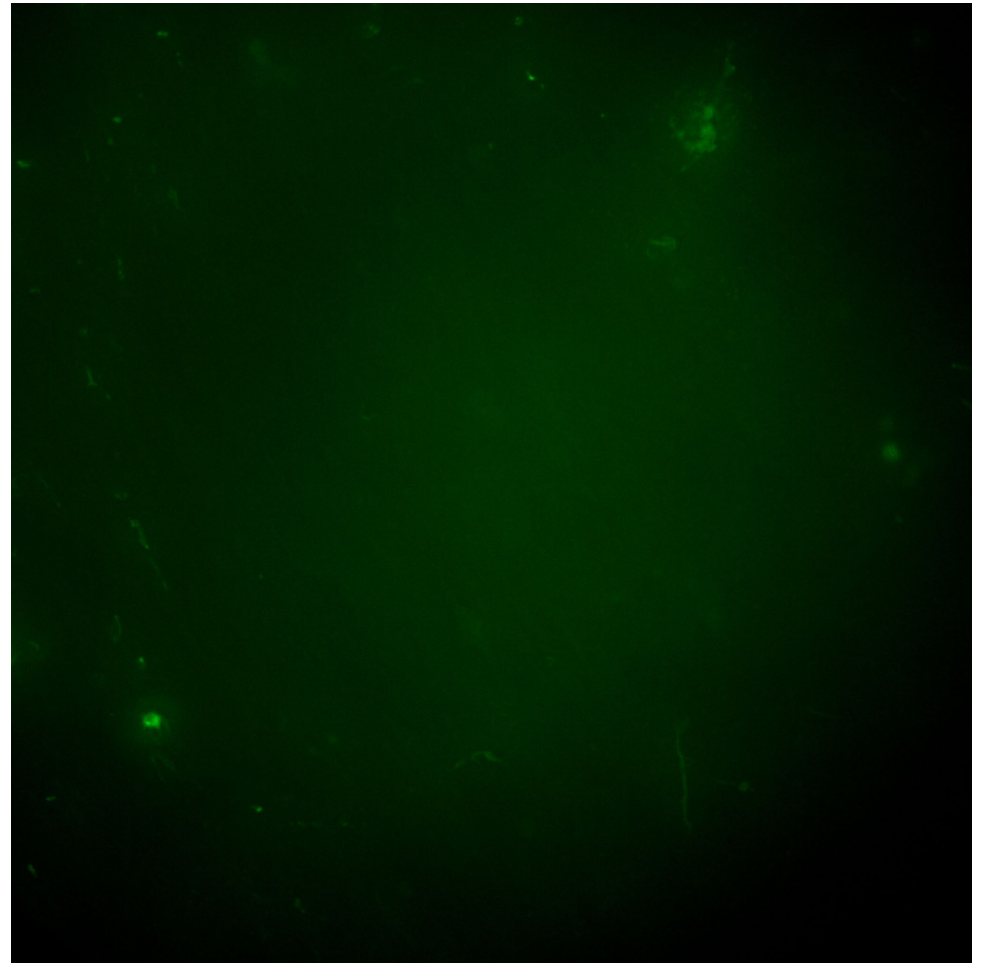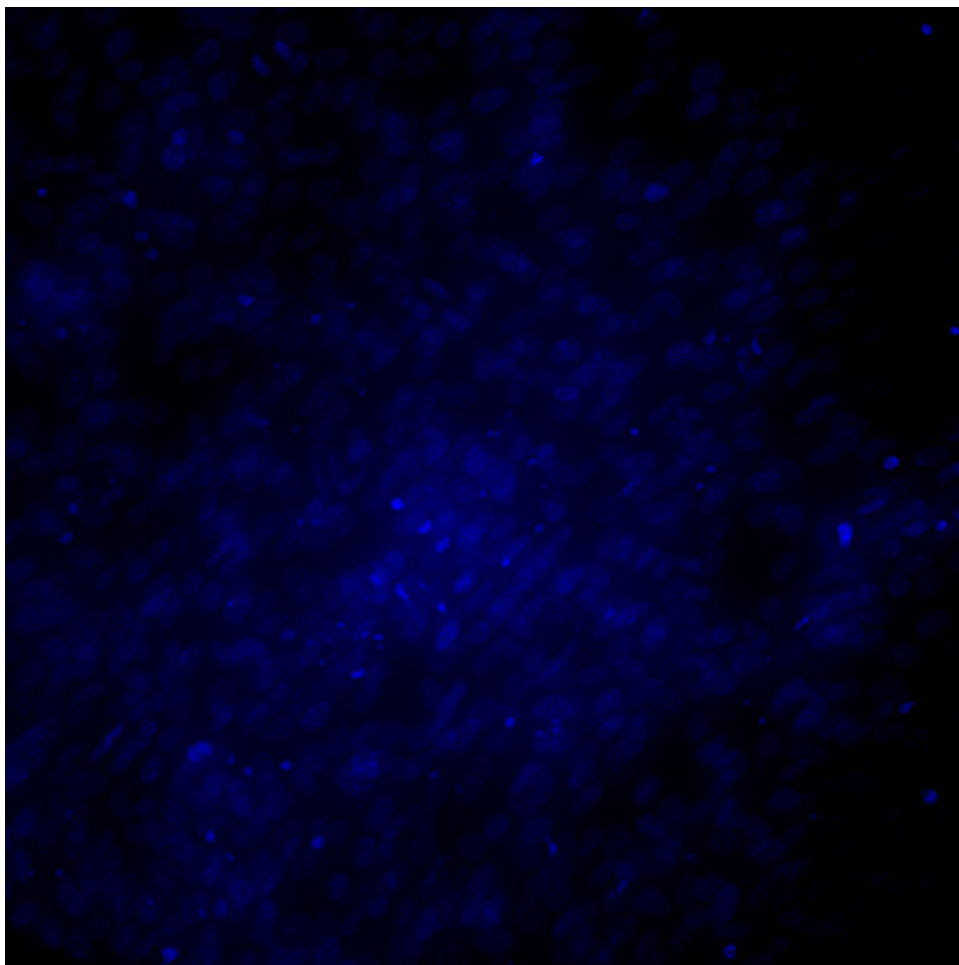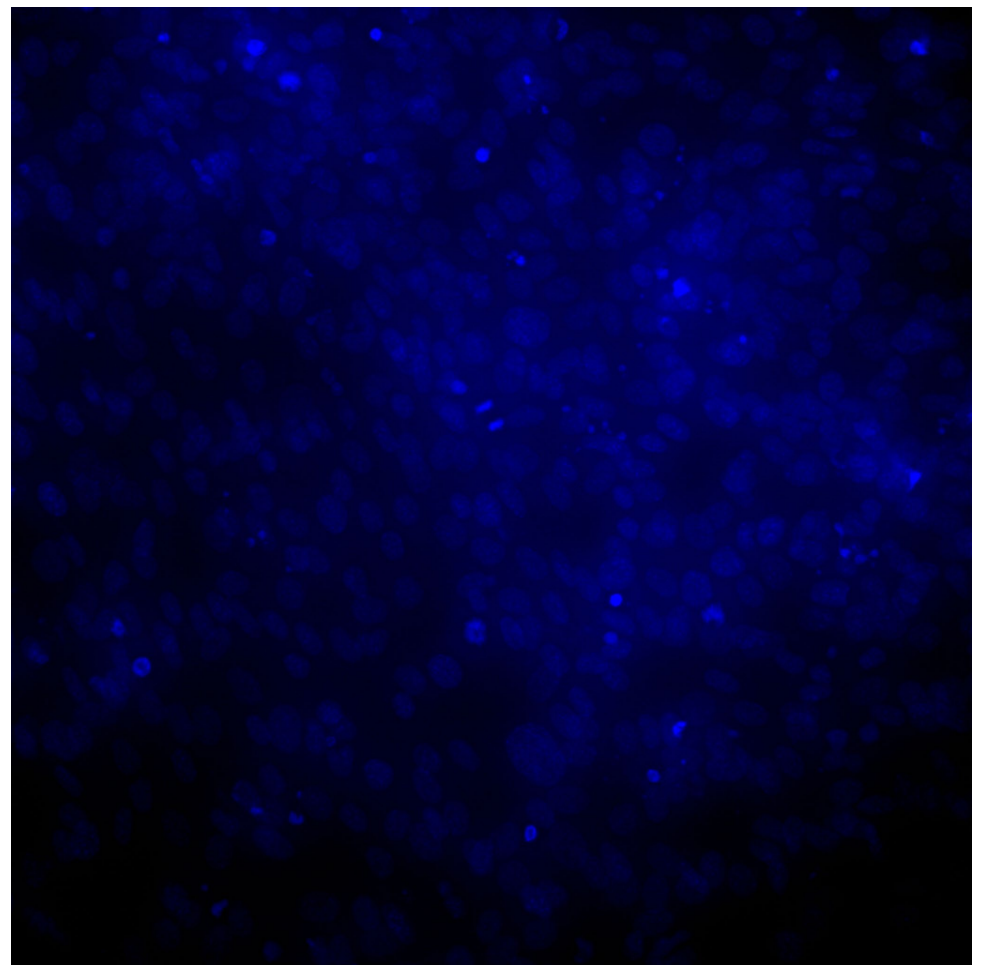



# Day 3 MHC

WT

2A4

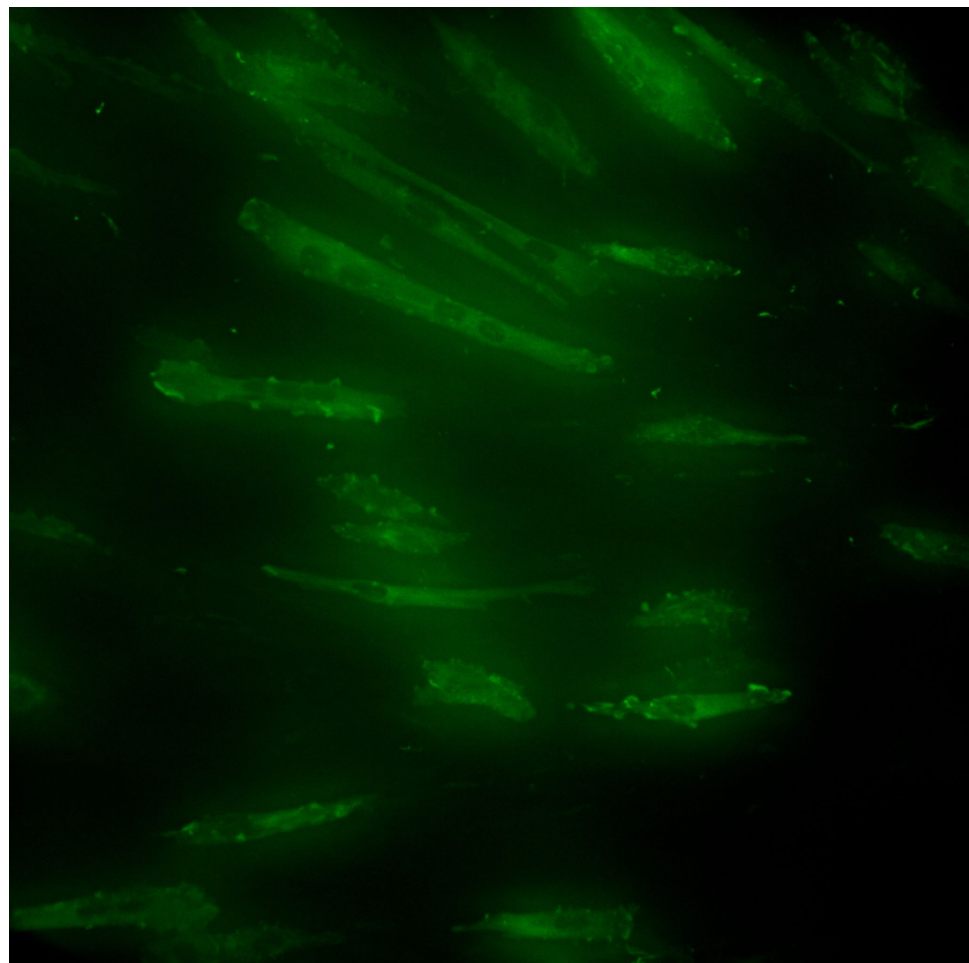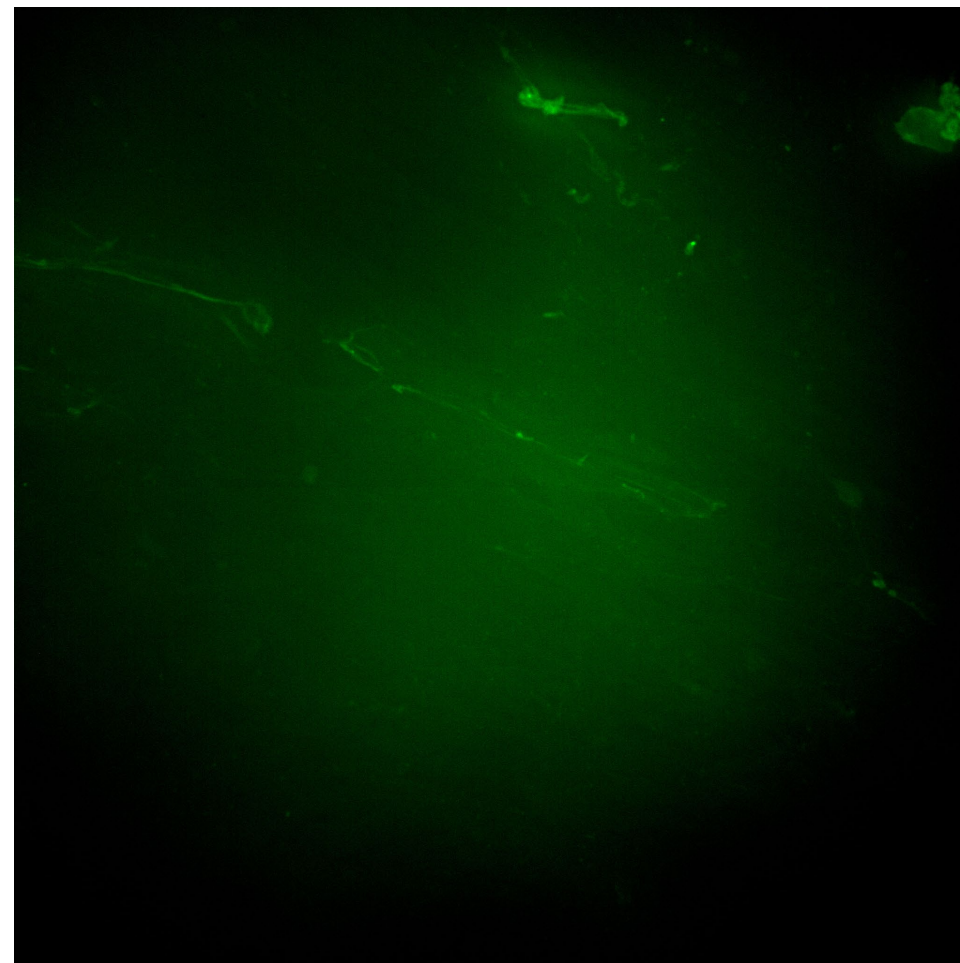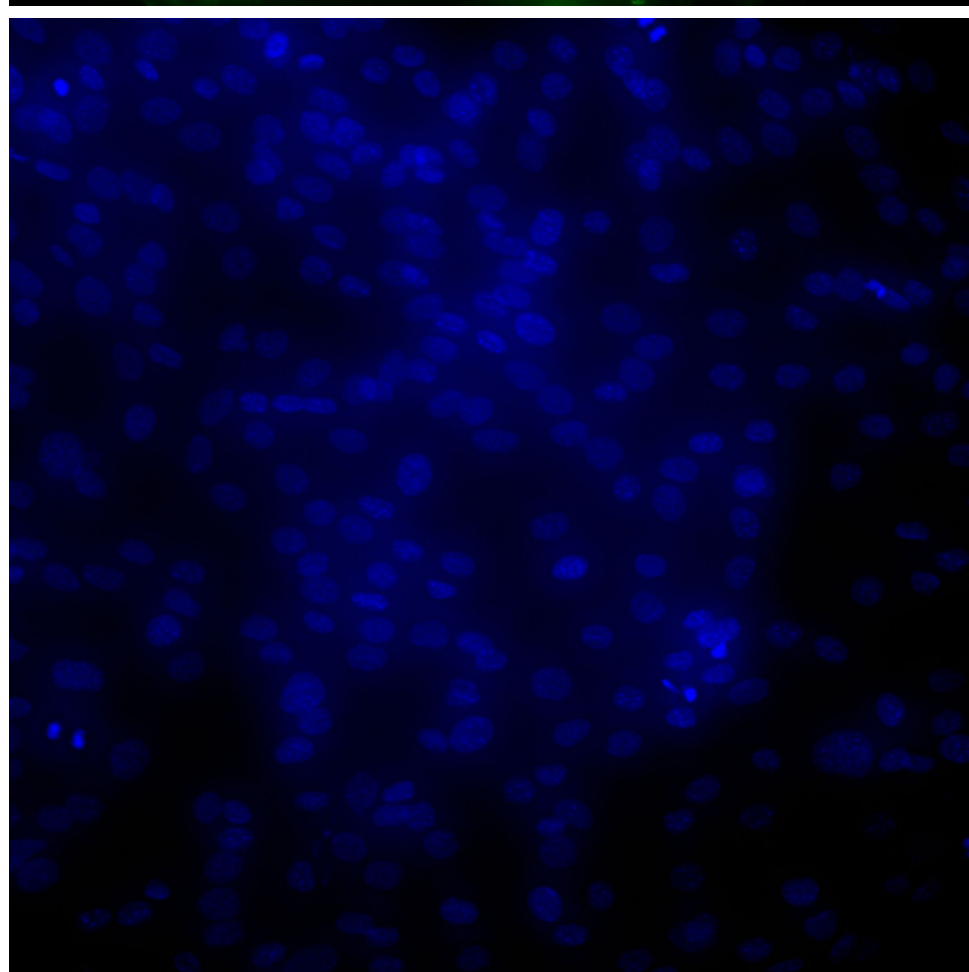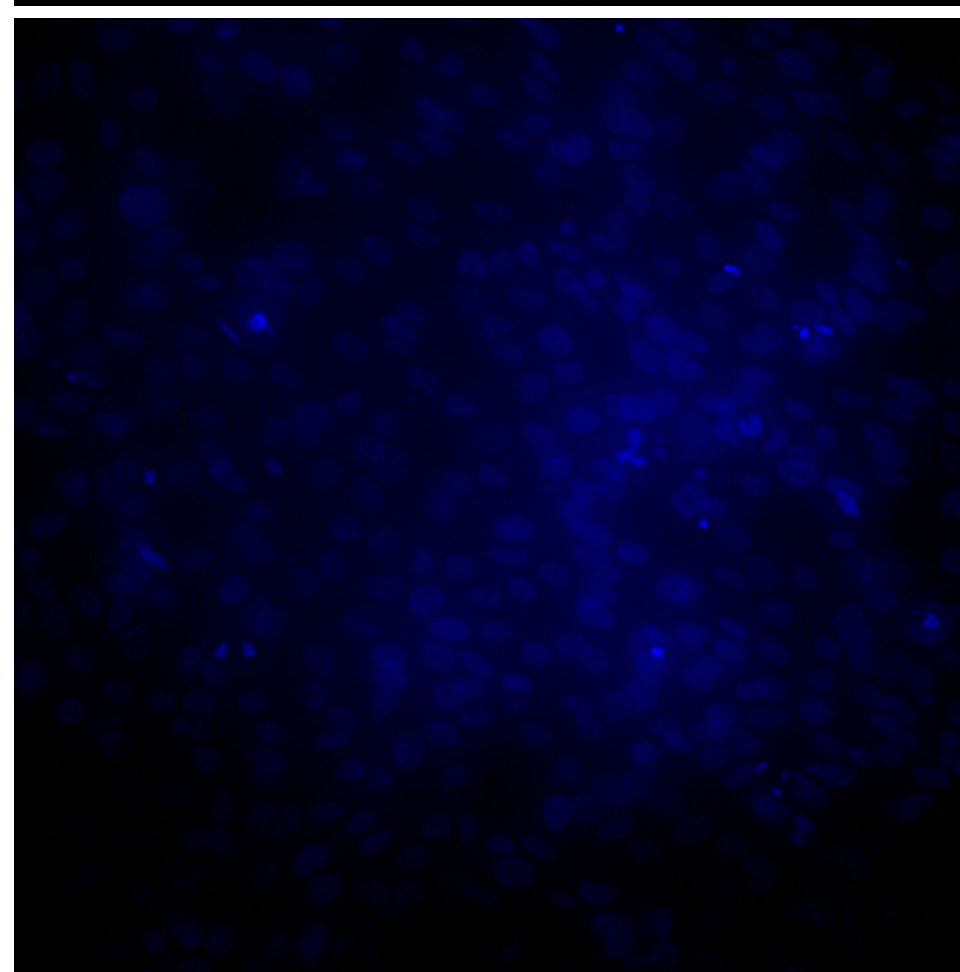



# Day 4 MHC

WT

2A4

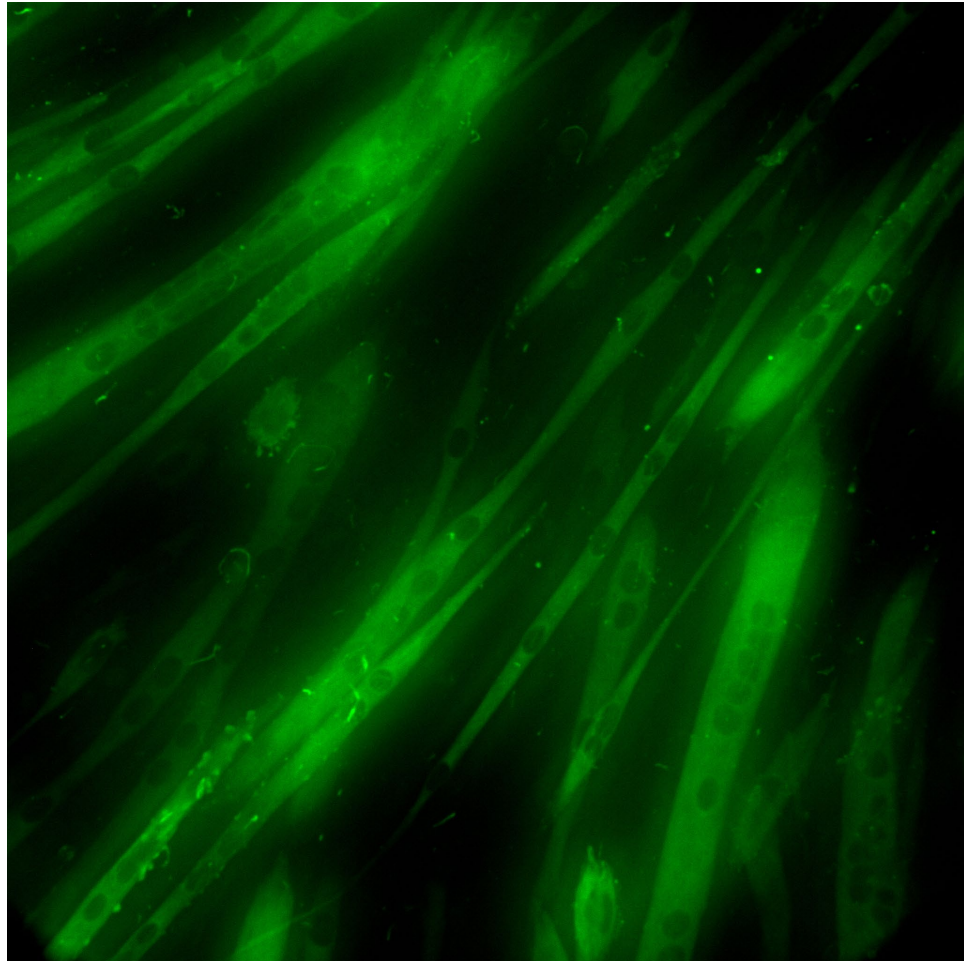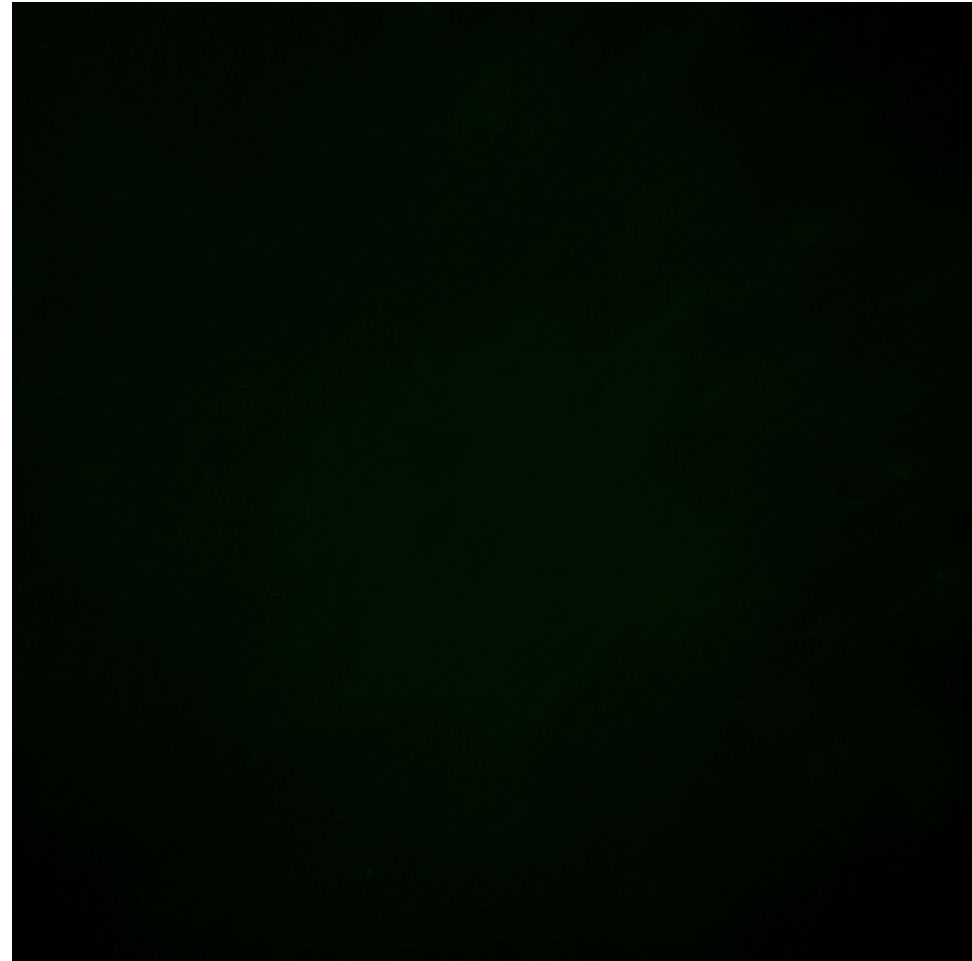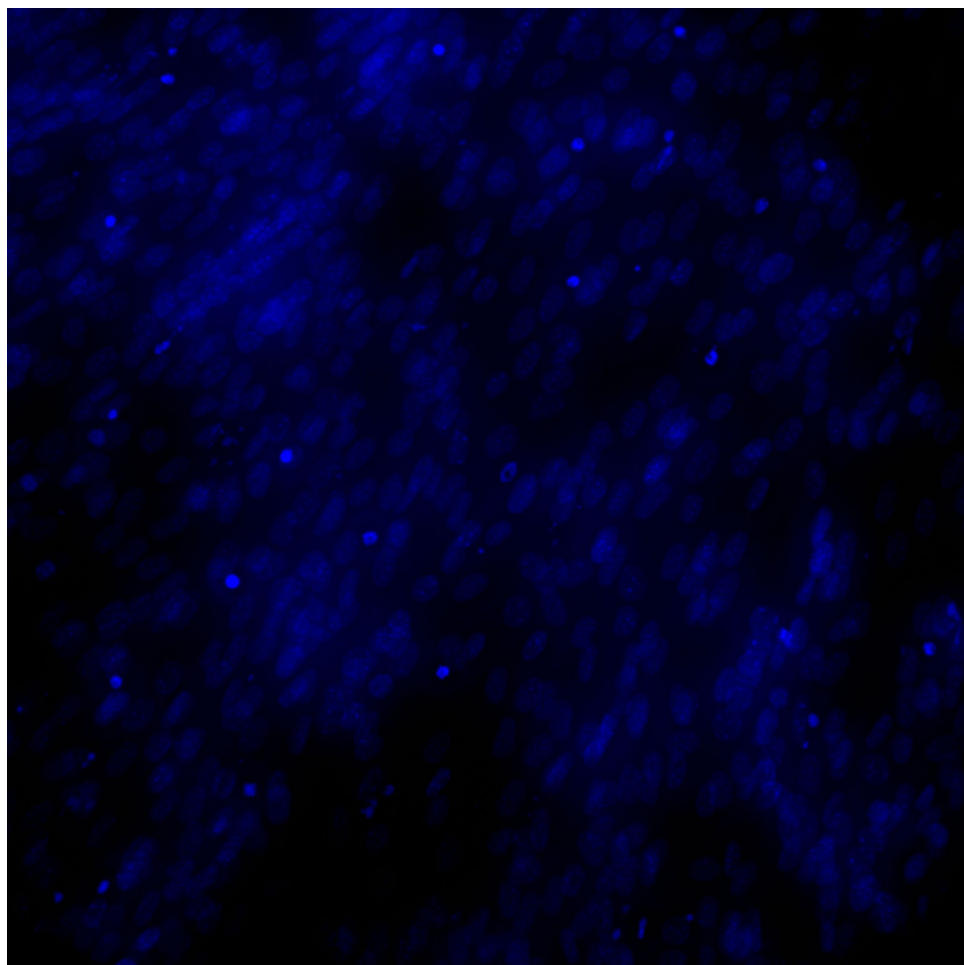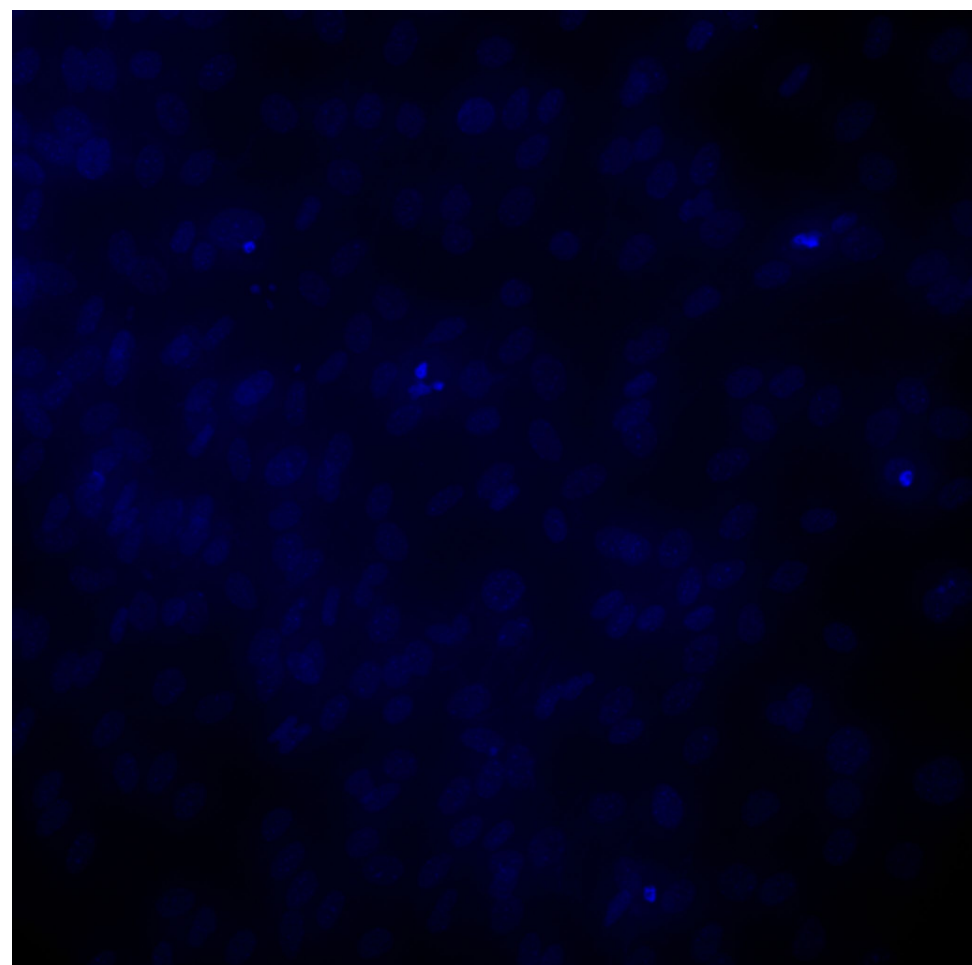



# Day 0 Brightfield

WT

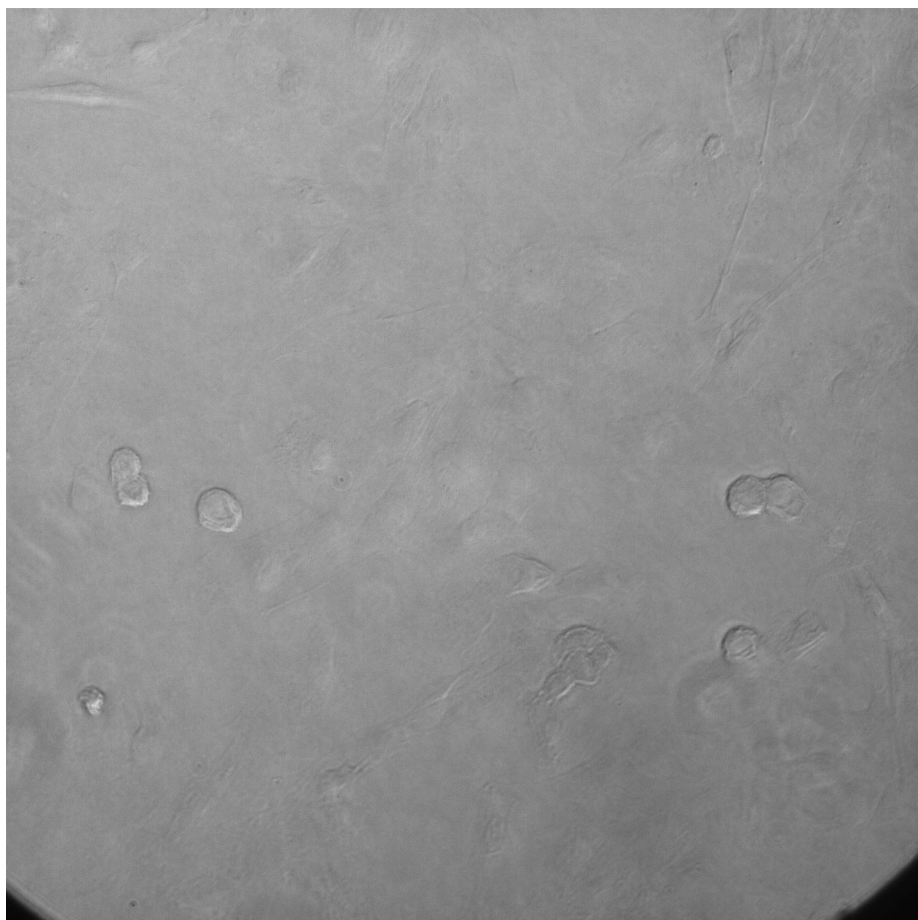

2A4

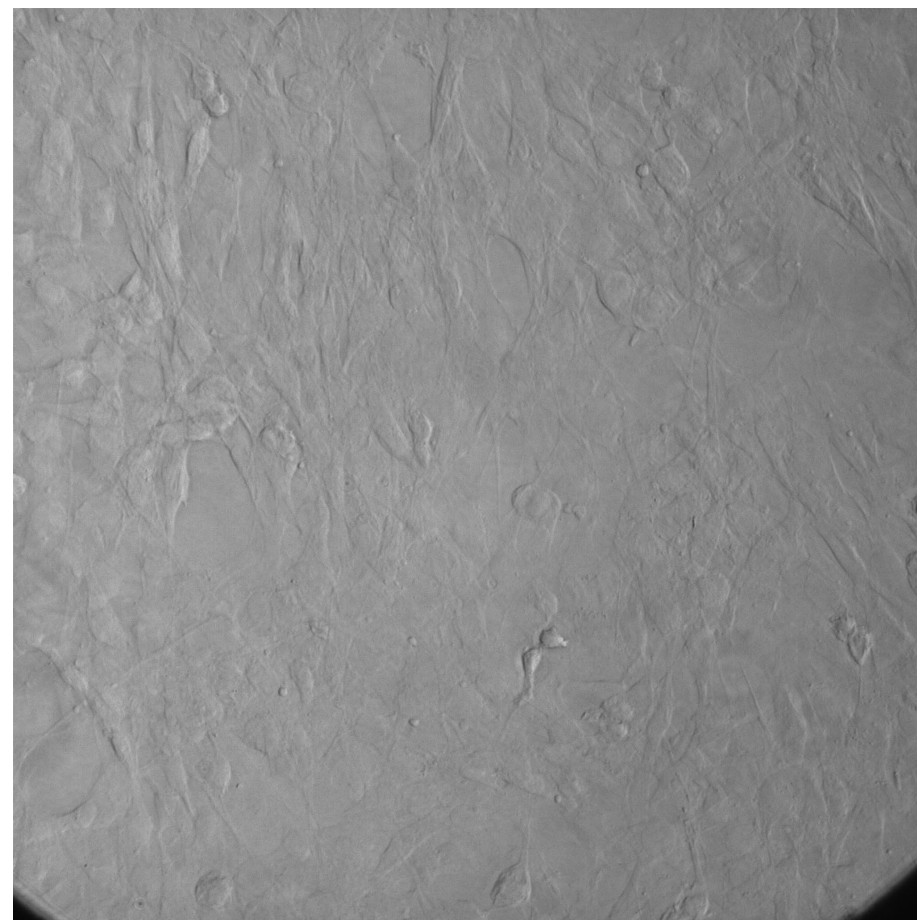



# Day 1 Brightfield

WT

2A4

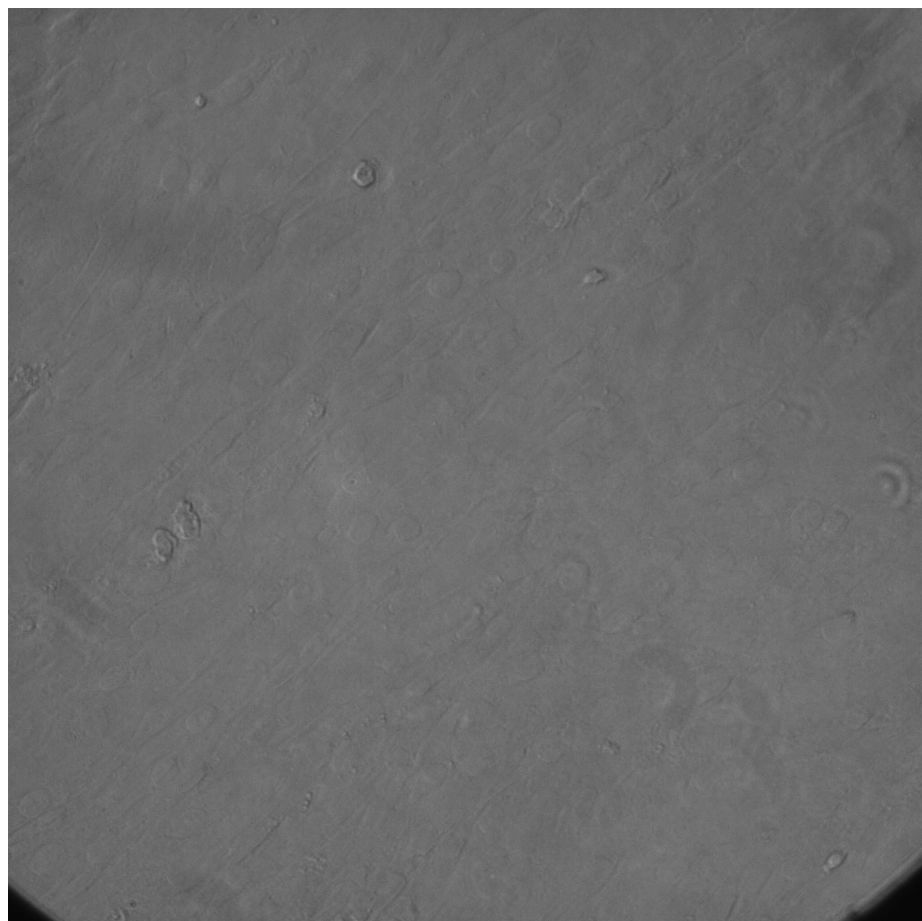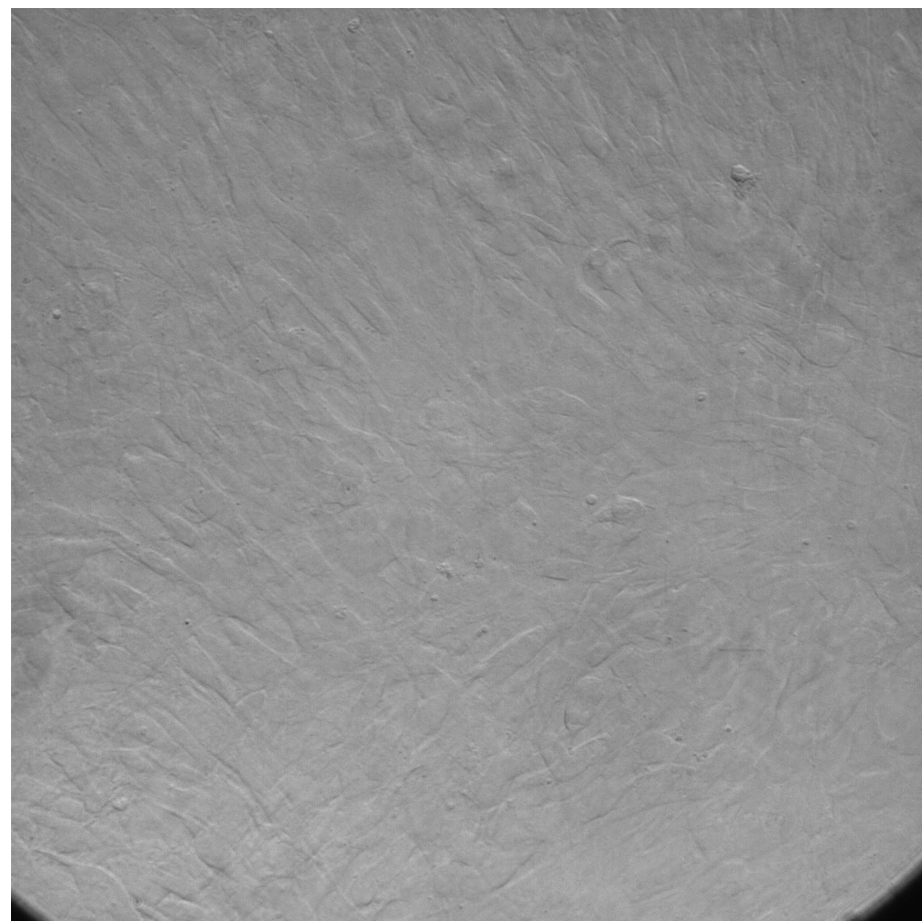



# Day 2 Brightfield

WT

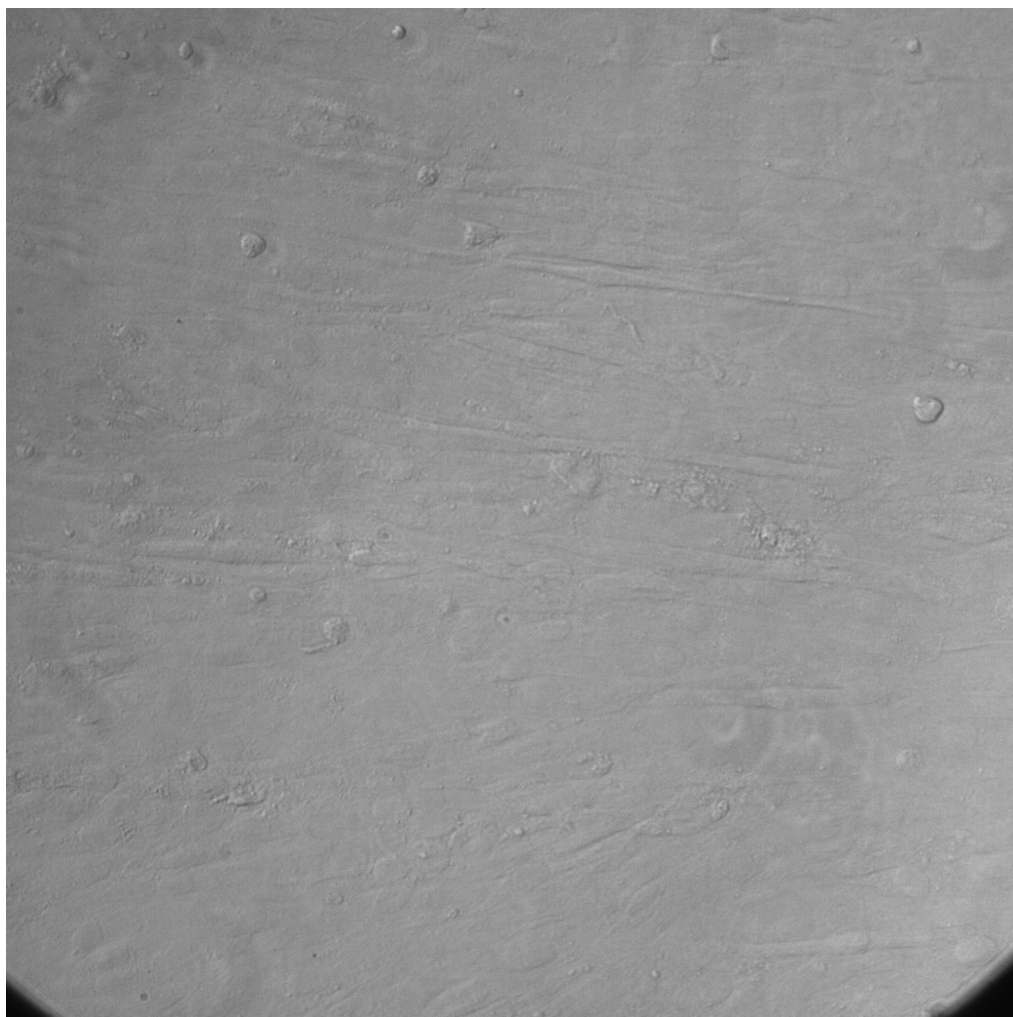

2A4

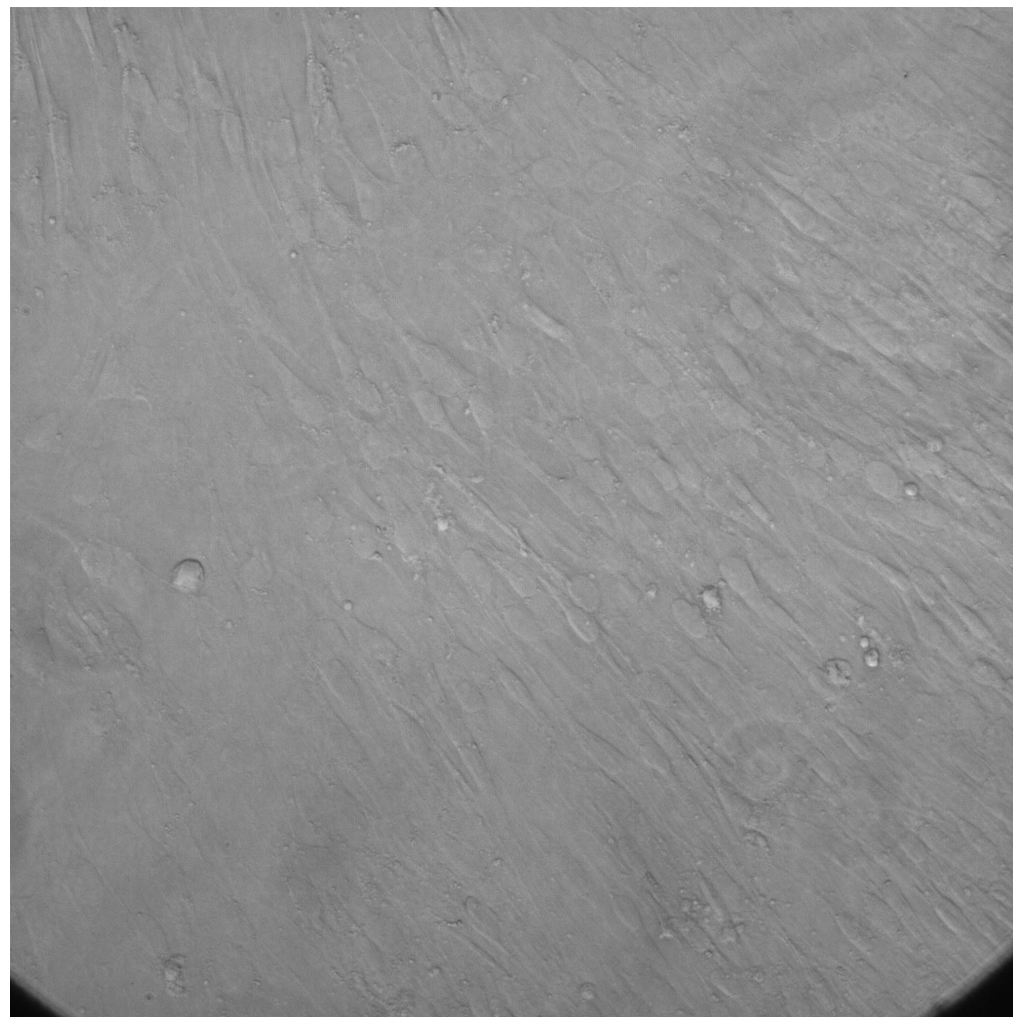



# Day 3 Brightfield

WT

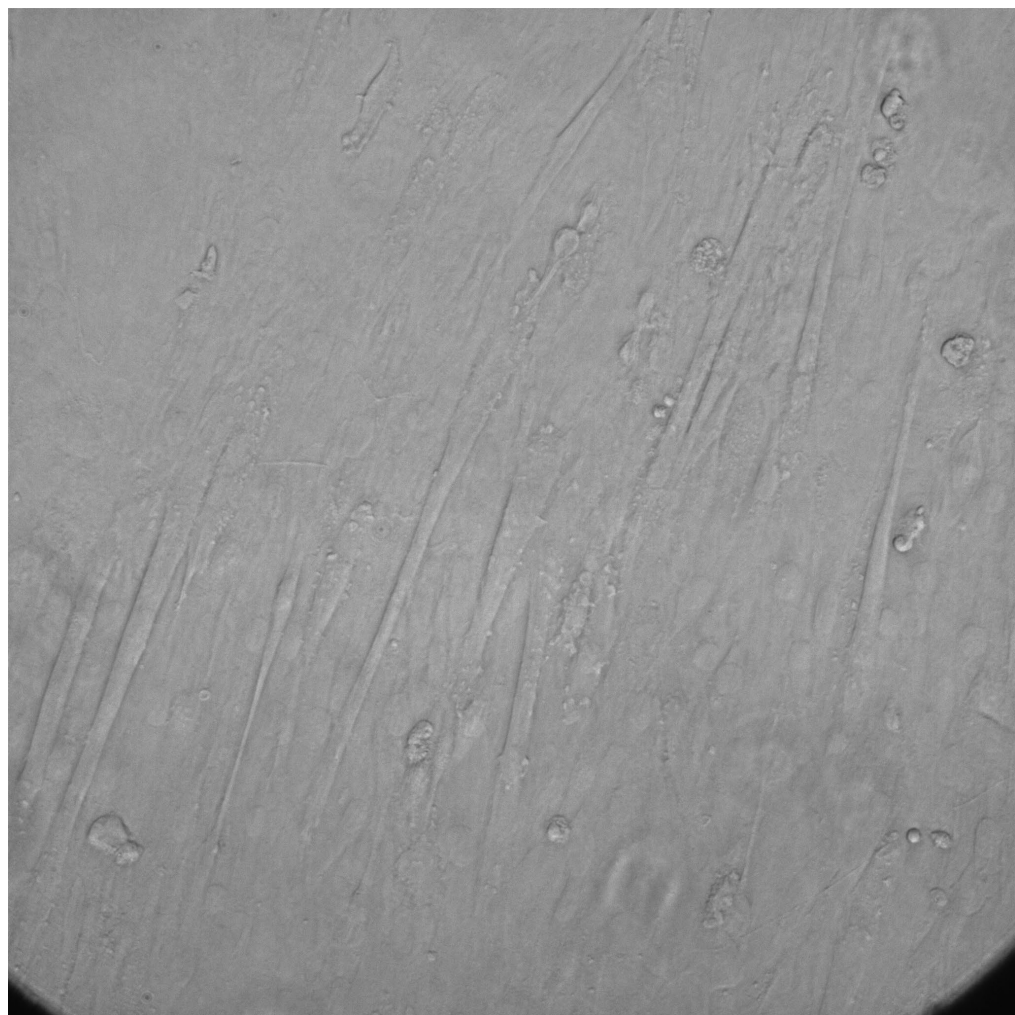

2A4

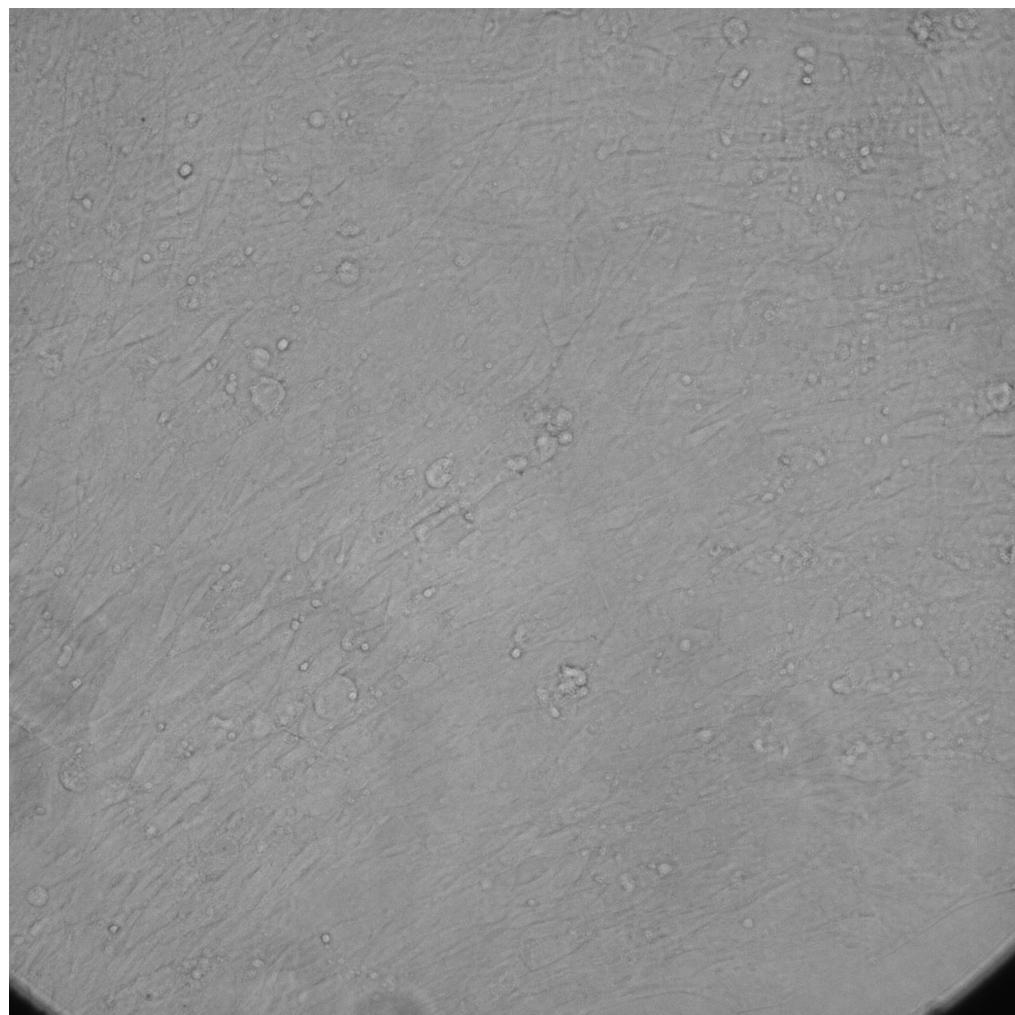



# Day 4 Brightfield

WT

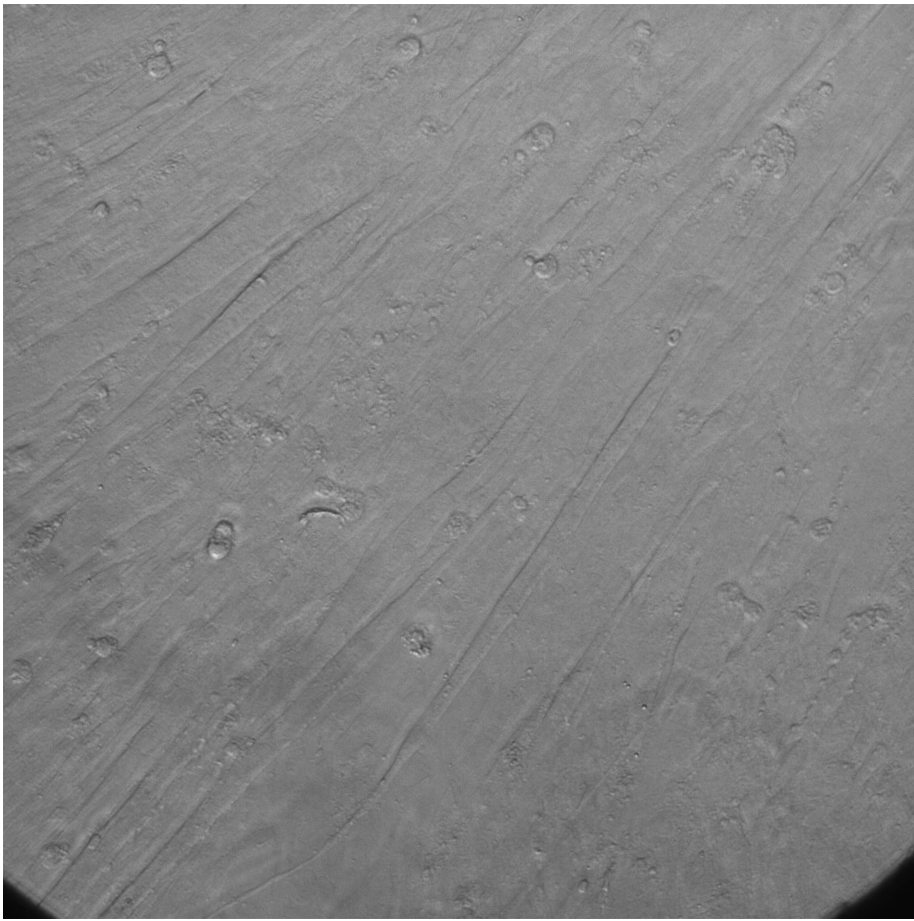

2A4

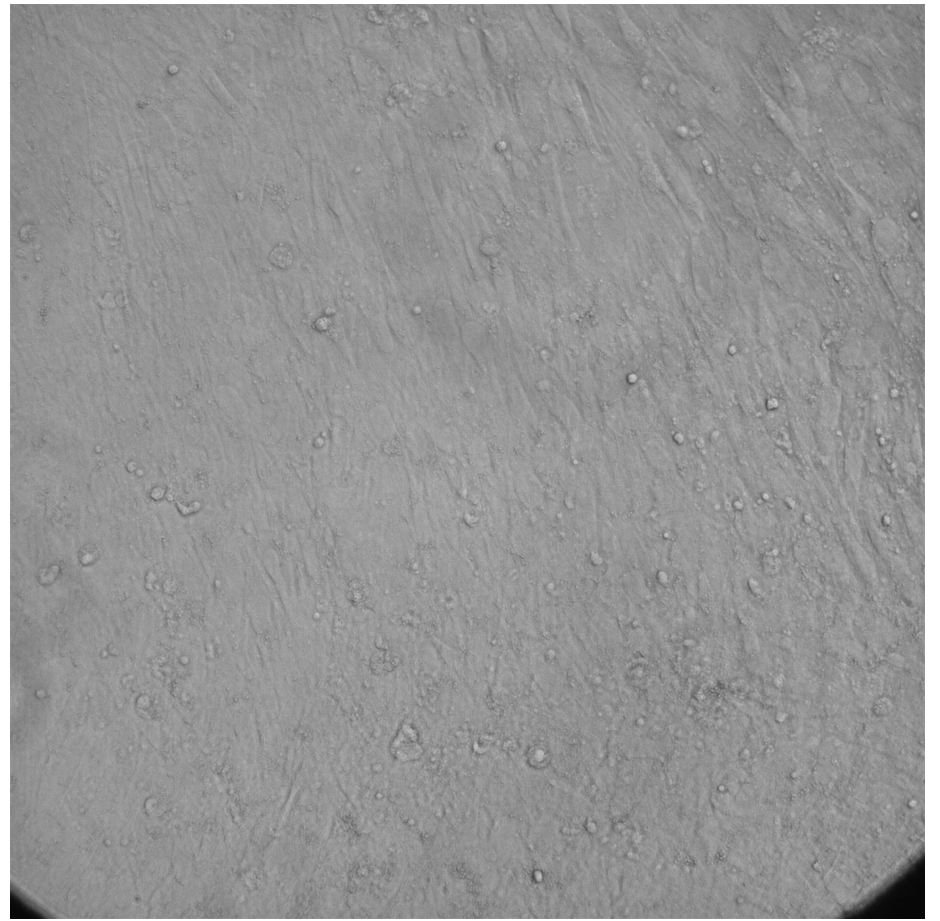

Supplement: pone.0239047.s004.pdf [file pone.0239047.s004.pdf]
